# Supplementary material for: Role of Breastfeeding and Complementary Food on Hemoglobin and Ferritin Levels in a Cambodian Cross-Sectional Sample of Children Aged 3 to 24 Months
Source: PLoS One. 2016 Mar 14;11(3):e0150750. doi: 10.1371/journal.pone.0150750 (PMC4790902; doi:10.1371/journal.pone.0150750)
Supplement: S1 Data — (XLSX) [file pone.0150750.s001.xlsx]

## Sheet: Cambodia_minimal data set_PlosO
EDUCRESPYEARS	DRINKWA	LATRINE	HHDDS	Wealthindex	VITA	DEWORM	BFSTILL	ExcluBF	ContinuedBF	ASF	CFI	SEXCHILD	age_days	age_sq	age_mo_compl	HCH	WCH	WLZ	LAZ	WAZ	crp	CRP_ln	agp	AGP_ln	Inflammation_new	HB	FER	FER_ln	sTfR	sTfR_ln	IDA	RBP	HAEMMO
3	1	2	6	1.70924	0	0	1	1	-99	-88	#NULL!	1	92	80007.6	3	59.55	5.875	0.01	-0.95	-0.72	0.04	0.0392207	0.72	-0.328504	0	100	60.6	4.10429	8.55	2.14593	3	1.27	12
0	1	2	7	-0.734109	1	0	1	1	-99	-88	#NULL!	2	93	79442.9	3	57.55	5.2	-0.06	-1.13	-0.97	0.14	0.131028	0.49	-0.71335	0	106	197.7	5.28675	5.65	1.73166	1	1.31	12.1
3	1	2	6	-1.03263	1	0	1	1	-99	-88	#NULL!	1	93	79442.9	3	59.2	5.3	-1.02	-1.16	-1.61	3.92	1.59331	1.09	0.0861777	3	110.21	50.7	3.92593	8.64	2.1564	#NULL!	0.85	12.1
3	1	2	8	1.50007	1	0	1	1	-99	-88	#NULL!	1	94	78880.2	3	57.7	5.7	0.78	-1.94	-1.03	#NULL!	#NULL!	#NULL!	#NULL!	#NULL!	#NULL!	#NULL!	#NULL!	#NULL!	#NULL!	#NULL!	#NULL!	12.2
0	1	2	5	-3.03877	0	0	1	1	-99	-88	#NULL!	2	94	78880.2	3	59.35	5.575	-0.27	-0.32	-0.46	0.02	0.0198026	0.36	-1.02165	0	110	73.8	4.30136	6.26	1.83418	#NULL!	0.7	11.8
3	1	2	6	3.16357	88	0	1	1	-99	-88	#NULL!	1	96	77760.7	3	62.45	6.325	-0.6	0.3	-0.22	0.47	0.385262	0.82	-0.198451	0	117	94.1	4.54436	6.67	1.89762	#NULL!	0.71	13.8
9	1	1	9	7.38008	1	0	1	1	-99	-88	#NULL!	1	96	77760.7	3	60.9	6.575	0.62	-0.46	0.12	0.59	0.463734	0.64	-0.446287	0	122	92.9	4.53152	7.75	2.04769	#NULL!	1.59	14.2
0	1	2	3	1.97079	1	0	1	1	-99	-88	#NULL!	2	97	77204	3	56.55	4.625	-0.8	-1.75	-2.02	0.61	0.476234	0.65	-0.430783	0	101	307.4	5.72815	5.09	1.62728	1	1.09	11.3
0	1	2	5	4.07191	1	0	1	1	-99	-88	#NULL!	2	97	77204	3	54.4	4.625	0.55	-2.77	-2.02	0.06	0.0582689	0.28	-1.27297	0	107	191.5	5.25489	5.3	1.66771	1	0.87	12.9
3	2	2	10	0.836398	0	0	1	1	-99	-88	#NULL!	2	97	77204	3	59.45	5.4	-0.66	-0.38	-0.79	4.99	1.79009	1.12	0.113329	3	107.12	216.75	5.37874	5.4912	1.70315	1	0.82	13.4
3	1	2	8	3.28733	0	0	1	1	-99	-88	#NULL!	1	97	77204	3	61	6.05	-0.42	-0.45	-0.62	3.29	1.45629	0.83	-0.18633	0	115	208.4	5.33946	12.33	2.51204	#NULL!	0.86	11.8
9	1	2	7	1.83238	1	0	1	1	-99	-88	#NULL!	2	98	76649.3	3	60.05	6.725	1.41	-0.14	0.93	0.24	0.215111	0.54	-0.616186	0	127	205.4	5.32496	6.99	1.94448	#NULL!	1.2	13.3
6	1	2	4	-4.46476	0	0	1	0	-99	-88	#NULL!	1	98	76649.3	3	58.55	6.075	0.99	-1.69	-0.62	0.32	0.277632	0.42	-0.867501	0	81	177.2	5.17728	14.63	2.68307	3	1.2	11.7
0	1	2	6	-0.484705	1	0	1	1	-99	-88	#NULL!	2	99	76096.6	3	59.2	5.525	-0.29	-0.57	-0.67	0.1	0.0953102	0.31	-1.17118	0	89	172.4	5.14982	5.52	1.70838	1	0.9	11.6
15	2	2	9	5.95622	1	0	1	1	-99	-88	#NULL!	2	100	75545.9	3	60.25	6.05	0.2	-0.12	0.04	0.36	0.307485	0.4	-0.916291	0	113	75	4.31749	7.18	1.9713	#NULL!	1.01	12.8
3	1	2	7	2.2811	1	0	1	1	-99	-88	#NULL!	1	103	73905.7	3	59.6	6.7	1.53	-1.38	0.09	0	0	0.49	-0.71335	0	84	4.2	1.43508	17.48	2.86106	4	0.94	13.3
3	1	2	7	-1.5575	1	0	1	1	-99	-88	#NULL!	1	104	73363	3	65.1	8.35	1.61	1.25	2.01	0.01	0.00995033	0.48	-0.733969	0	121	58.7	4.07244	8.54	2.14476	#NULL!	1.05	11.6
15	1	2	8	3.56696	1	0	1	0	-99	-88	#NULL!	1	105	72822.3	3	62.9	6.175	-1.11	0.15	-0.68	0.37	0.314811	0.46	-0.776529	0	109	97.2	4.57677	6.3	1.84055	1	0.83	12.4
9	1	1	8	11.276	1	0	1	0	-99	-88	#NULL!	2	105	72822.3	3	59.05	5.45	-0.35	-0.86	-0.93	0.21	0.19062	0.44	-0.820981	0	114	156.3	5.05178	6.53	1.87641	#NULL!	1.39	13.7
3	2	2	6	-4.11085	1	0	1	0	-99	-88	#NULL!	1	106	72283.6	3	61.45	6.575	0.35	-0.6	-0.17	32.31	3.50586	1.03	0.0295588	2	127.68	33.761	3.51931	6.0552	1.80092	#NULL!	0.73	11.5
3	1	2	6	-0.177317	1	0	1	1	-99	-88	#NULL!	1	107	71746.9	3	60.7	6.15	-0.06	-1	-0.76	3.68	1.5433	1	0	0	110	133.8	4.89635	6.96	1.94018	#NULL!	0.88	12.1
3	1	2	9	-4.28224	1	0	1	1	-99	-88	#NULL!	1	107	71746.9	3	58	5.775	0.74	-2.31	-1.31	0.12	0.113329	0.35	-1.04982	0	108	125.9	4.83549	7.77	2.05027	1	0.71	11.3
6	1	2	8	5.92297	1	0	1	1	-99	-88	#NULL!	1	108	71212.2	3	57.75	5.575	0.48	-2.46	-1.63	0.77	0.57098	0.55	-0.597837	0	107	75.8	4.3281	7.57	2.02419	1	1.19	10
9	1	2	7	-2.1397	0	0	1	0	-99	-88	#NULL!	1	109	70679.5	3	58.9	5.45	-0.49	-1.94	-1.84	0	0	0.4	-0.916291	0	106	94.3	4.54648	7.44	2.00687	1	1.2	13.7
3	1	2	4	0.177413	1	0	1	1	-99	-88	#NULL!	1	111	69620	3	60.05	5.775	-0.48	-1.46	-1.41	0.02	0.0198026	0.3	-1.20397	0	102	85.9	4.45318	6.08	1.805	1	1.35	13.1
0	1	2	3	-4.27546	0	0	1	1	-99	-88	#NULL!	1	111	69620	3	62.65	6.075	-1.2	-0.21	-0.98	0.52	0.41871	0.71	-0.34249	0	98	126.5	4.84024	6.1	1.80829	1	0.77	12.6
0	1	2	5	-3.28891	0	0	1	1	-99	-88	#NULL!	1	111	69620	3	58.55	6.05	0.95	-2.19	-1.01	0.44	0.364643	0.54	-0.616186	0	82	58.5	4.06903	6.95	1.93874	1	0.89	11.1
9	2	1	8	3.00263	1	1	1	1	-99	-88	#NULL!	1	114	68045.9	3	63.45	6.575	-0.58	0.07	-0.37	0.26	0.231112	0.44	-0.820981	0	109	212.1	5.35706	5.68	1.73695	1	1.01	10.5
3	1	1	8	0.0785049	1	0	1	1	-99	-88	#NULL!	2	114	68045.9	3	62	7.05	1.08	0.21	0.92	0.65	0.500775	1.14	0.131028	3	124.63	113.625	4.7329	7.7568	2.04857	#NULL!	1.53	12.4
0	1	2	7	-4.59322	1	0	1	1	-99	-88	#NULL!	2	115	67525.2	3	59.9	5.275	-1.16	-0.8	-1.44	0.16	0.14842	0.37	-0.994252	0	108	16.3	2.79117	9.32	2.23216	3	0.71	12.2
6	1	2	6	-0.997683	1	0	1	1	-99	-88	#NULL!	1	116	67006.5	3	63.75	7.275	0.52	0.14	0.47	0.23	0.207014	0.53	-0.634878	0	100	67.8	4.21656	5.88	1.77156	1	0.91	12.2
3	2	2	7	-3.3889	1	0	1	1	-99	-88	#NULL!	2	117	66489.8	3	62.15	7.175	1.2	0.18	0.99	0.13	0.122218	0.44	-0.820981	0	118	67	4.20469	7.36	1.99606	#NULL!	1.16	11.4
0	1	2	8	-2.16581	1	0	1	1	-99	-88	#NULL!	1	119	65462.3	3	55	4.4	-0.38	-4.18	-3.81	0.12	0.113329	0.57	-0.562119	0	104	197.4	5.28523	6.31	1.84214	1	0.91	12.9
9	2	2	7	-2.68605	0	0	1	1	-99	-88	#NULL!	1	119	65462.3	3	60.5	5.875	-0.52	-1.53	-1.47	0.18	0.165514	0.45	-0.798508	0	116	77.3	4.34769	12.14	2.49651	#NULL!	1	12.7
3	1	2	6	-3.25393	1	0	1	1	-99	-88	#NULL!	1	120	64951.6	3	66.2	8	0.7	1.17	1.23	0.29	0.254642	0.45	-0.798508	0	108	35	3.55535	6.94	1.9373	1	1.01	12.4
3	1	2	6	2.55035	1	0	1	1	-99	-88	#NULL!	1	120	64951.6	3	62.6	6.925	0.43	-0.56	-0.06	0.68	0.518794	0.52	-0.653926	0	100	144.4	4.97259	7.28	1.98513	1	0.99	14
3	1	2	9	0.349727	0	0	1	1	-99	-88	#NULL!	2	121	64442.9	3	60.25	6.925	1.63	-0.83	0.62	16.16	2.84258	0.88	-0.127833	1	122.76	190.883	5.25166	6.9216	1.93465	#NULL!	1.02	13.9
9	2	1	6	-3.67211	1	0	1	1	-99	-88	#NULL!	1	121	64442.9	3	64.25	7.75	1.07	0.2	0.92	0.3	0.262364	0.7	-0.356675	0	122	52.3	3.957	7.51	2.01624	#NULL!	1.31	11.4
3	2	2	9	-3.82889	1	0	1	1	-99	-88	#NULL!	1	121	64442.9	3	62.55	7.35	1.16	-0.62	0.45	0.69	0.524729	0.51	-0.673345	0	98	238.5	5.47437	7.91	2.06813	1	0.84	12.3
3	2	2	6	-4.38902	1	1	1	1	-99	-88	#NULL!	1	122	63936.2	4	61.85	6.8	0.57	-0.99	-0.26	1.22	0.797507	0.84	-0.174353	0	107	69.7	4.2442	8.45	2.13417	3	1.09	11.7
3	1	1	7	3.19511	0	0	1	1	-99	-88	#NULL!	2	123	63431.5	4	62	4.925	-2.98	-0.08	-2.18	0.4	0.336472	0.59	-0.527633	0	112	24.9	3.21487	8.79	2.17361	#NULL!	0.6	15.5
0	1	2	4	-2.81774	1	1	1	1	-99	-88	#NULL!	1	125	62428.1	4	62.15	6.625	0.1	-0.94	-0.57	#NULL!	#NULL!	#NULL!	#NULL!	#NULL!	#NULL!	#NULL!	#NULL!	#NULL!	#NULL!	#NULL!	#NULL!	10.3
9	1	2	4	-3.33158	1	0	1	1	-99	-88	#NULL!	2	125	62428.1	4	57.3	5.4	0.49	-2.31	-1.47	0.19	0.173953	0.49	-0.71335	0	107	47	3.85015	5.25	1.65823	1	1.39	11.7
9	1	1	8	8.89194	0	0	1	1	-99	-88	#NULL!	1	125	62428.1	4	60.4	6.575	0.88	-1.78	-0.64	0.54	0.431782	0.83	-0.18633	0	127	89.4	4.49312	8.75	2.16905	#NULL!	1.16	11.5
3	1	2	7	1.40355	1	0	1	1	-99	-88	#NULL!	1	127	61432.7	4	62.85	6.225	-0.99	-0.68	-1.16	3.09	1.40854	1.26	0.231112	3	113.3	45.3	3.81331	6.816	1.91927	#NULL!	1.1	10.2
0	1	2	6	0.676937	1	1	1	1	-99	-88	#NULL!	2	128	60937.9	4	61	5.975	-0.29	-0.7	-0.72	2.94	1.37118	0.95	-0.0512933	0	116	242.9	5.49265	6.02	1.79509	#NULL!	0.81	12.1
0	1	2	4	-2.86415	0	0	1	0	-99	-88	#NULL!	1	128	60937.9	4	60.7	5.4	-1.67	-1.74	-2.4	0.71	0.536493	0.77	-0.261365	0	107	43.8	3.77963	6.05	1.80006	1	1.39	13.5
9	1	2	7	2.10603	0	0	1	1	-99	-88	#NULL!	2	128	60937.9	4	59.65	6.175	0.7	-1.32	-0.46	0.61	0.476234	0.5	-0.693147	0	109	100.8	4.61314	7.7	2.04122	1	1.24	13.6
0	1	2	8	-3.53905	0	0	1	1	-99	-88	#NULL!	1	129	60445.2	4	60.95	5.725	-1.08	-1.65	-1.93	0.02	0.0198026	0.36	-1.02165	0	137	78.5	4.3631	6.43	1.86097	#NULL!	0.92	11.2
0	1	2	6	2.50364	0	0	1	0	-99	-88	#NULL!	2	130	59954.5	4	63.5	7.025	0.45	0.39	0.55	0.08	0.076961	0.64	-0.446287	0	102	54.5	3.9982	6.77	1.9125	1	1.21	10.9
3	1	2	6	-0.634629	1	1	1	1	-99	-88	#NULL!	1	130	59954.5	4	60.95	8.1	2.98	-1.68	1.12	0.8	0.587787	0.61	-0.494296	0	117	29.3	3.37759	8.69	2.16217	#NULL!	0.74	13.6
3	1	2	8	3.54921	1	0	1	1	-99	-88	#NULL!	2	131	59465.8	4	60.5	7.475	2.3	-1.01	1.03	0.87	0.625938	0.77	-0.261365	0	111	38.5	3.65066	13.54	2.60565	#NULL!	1.31	10.7
0	1	2	5	-3.33158	1	0	1	1	-99	-88	#NULL!	1	133	58494.4	4	60.2	6.075	0.05	-2.14	-1.51	1.53	0.928219	0.71	-0.34249	0	101	53.8	3.98527	8.13	2.09556	1	1.21	11
3	1	2	6	-2.81774	0	0	1	1	-99	-88	#NULL!	1	133	58494.4	4	62.95	5.7	-2.14	-0.82	-2.05	0.3	0.262364	0.5	-0.693147	0	106	26.5	3.27714	8.34	2.12106	3	1.09	10.8
0	1	2	6	-1.19464	1	0	1	0	-99	-88	#NULL!	2	134	58011.7	4	60.3	5.6	-0.67	-1.19	-1.37	0.17	0.157004	0.4	-0.916291	0	103	191.2	5.25332	5.19	1.64673	1	1	11.5
0	1	1	5	-1.36195	1	0	1	1	-99	-88	#NULL!	1	134	58011.7	4	61.8	7.025	0.96	-1.41	-0.25	0.27	0.239017	0.68	-0.385662	0	116	31.6	3.45316	8.17	2.10047	#NULL!	1.21	12.6
3	1	2	6	1.06705	1	0	1	1	-99	-88	#NULL!	1	134	58011.7	4	57.6	5.925	1.28	-3.41	-1.74	0	0	0.66	-0.415515	0	109	48.3	3.87743	8.47	2.13653	3	1.34	12.8
3	2	2	6	7.27663	1	0	1	1	-99	-88	#NULL!	1	134	58011.7	4	63.4	6.175	-1.34	-0.64	-1.38	1.79	1.02604	0.77	-0.261365	0	111	58.3	4.0656	9.68	2.27006	#NULL!	0.75	13.2
3	1	2	9	-2.02851	0	0	1	1	-99	-88	#NULL!	2	135	57531	4	62.05	6.425	0.06	-0.42	-0.28	6.67	2.03732	0.61	-0.494296	1	110.88	75.383	4.32258	6.7568	1.91055	#NULL!	1.06	14
12	1	2	9	-0.926688	1	0	1	1	-99	-88	#NULL!	2	135	57531	4	61.65	5.625	-1.26	-0.6	-1.36	0.61	0.476234	0.62	-0.478036	0	97	28.2	3.33932	6.76	1.91102	1	1.26	13.1
0	1	2	6	-2.96436	1	1	1	1	-99	-88	#NULL!	2	137	56575.5	4	61.1	5.775	-0.71	-0.91	-1.18	0.19	0.173953	0.42	-0.867501	0	113	20.6	3.02529	7.61	2.02946	#NULL!	1.01	12.9
3	1	2	5	-2.4316	1	0	1	1	-99	-88	#NULL!	2	137	56575.5	4	60.15	5.975	0.11	-1.35	-0.9	0.13	0.122218	0.68	-0.385662	0	127	64.5	4.16667	8.11	2.0931	#NULL!	1.23	14.2
0	1	2	7	-1.83119	0	0	1	0	-99	-88	#NULL!	1	137	56575.5	4	64.6	6.075	-2.09	-0.16	-1.59	0.07	0.0676586	0.53	-0.634878	0	108	36.3	3.59182	8.15	2.09802	1	1.02	12.6
3	1	2	6	-3.59945	0	1	1	1	-99	-88	#NULL!	1	138	56100.8	4	64.3	8.6	2.25	-0.34	1.5	0.37	0.314811	0.7	-0.356675	0	112	98.7	4.59208	6.9	1.93152	#NULL!	1.66	13.8
3	2	2	6	-3.58499	1	0	1	0	-99	-88	#NULL!	1	139	55628.1	4	66.1	7.6	0.12	0.49	0.36	0.08	0.076961	0.53	-0.634878	0	120	9	2.19722	8.7	2.16332	#NULL!	1.08	12.1
3	1	2	7	-3.64935	1	1	1	1	-99	-88	#NULL!	1	139	55628.1	4	62.3	7.025	0.73	-1.32	-0.35	3.14	1.4207	1.17	0.157004	3	101.97	6.9	1.93152	11.7504	2.46389	4	1.13	14.1
9	1	2	6	-4.09294	1	0	1	1	-99	-88	#NULL!	1	140	55157.4	4	64.4	8.075	1.48	-0.35	0.88	1.04	0.71295	0.61	-0.494296	0	123	22.8	3.12676	8.7	2.16332	#NULL!	0.82	15.2
9	1	1	8	5.86156	1	0	1	1	-99	-88	#NULL!	1	144	53294.5	4	65.1	7.15	-0.24	-0.14	-0.29	6.31	1.98924	0.89	-0.116534	1	100.98	61.908	4.12565	7.313	1.98965	1	0.91	12.6
0	1	2	5	-1.13503	1	0	1	1	-99	-88	#NULL!	2	145	52833.8	4	60.3	6.125	0.31	-1.5	-0.85	0.03	0.0295588	0.34	-1.07881	0	110	46.1	3.83081	5.37	1.68083	#NULL!	1.09	13.7
0	1	2	7	-0.855785	1	1	1	1	-99	-88	#NULL!	1	145	52833.8	4	63.25	7.225	0.65	-1.05	-0.22	0.1	0.0953102	0.46	-0.776529	0	107	39.8	3.68387	8.83	2.17816	3	1.29	13.8
6	1	2	8	-3.52832	1	0	0	0	-99	-88	#NULL!	2	146	52375.1	4	62.5	6.7	0.34	-0.53	-0.13	2.58	1.27536	0.71	-0.34249	0	112	109.9	4.69957	5.5	1.70475	#NULL!	0.87	12.9
9	1	2	6	-0.559115	1	0	1	1	-99	-88	#NULL!	1	146	52375.1	4	62.4	6.875	0.43	-1.48	-0.68	0.42	0.350657	0.96	-0.040822	0	85	54.1	3.99083	5.7	1.74047	1	2.06	11.2
3	2	1	9	2.45451	88	88	1	0	-99	-88	#NULL!	2	146	52375.1	4	61.35	5.2	-2.02	-1.05	-2.2	0.57	0.451076	0.42	-0.867501	0	128	115.3	4.74754	6.26	1.83418	#NULL!	0.73	13.4
0	1	2	7	0.561926	1	1	1	1	-99	-88	#NULL!	1	146	52375.1	4	64.1	7.15	0.17	-0.67	-0.33	0.14	0.131028	0.56	-0.579818	0	101	33.5	3.51155	14.14	2.64901	3	1.03	13
6	1	2	7	5.07951	1	0	1	1	-99	-88	#NULL!	1	147	51918.4	4	62.1	6.55	0	-1.65	-1.13	0.34	0.29267	0.43	-0.84397	0	112	92.3	4.52504	6.58	1.88403	#NULL!	1.13	12
3	1	2	5	-3.32912	1	0	1	0	-99	-88	#NULL!	1	147	51918.4	4	62.3	7.175	0.98	-1.56	-0.32	0.09	0.0861777	0.46	-0.776529	0	101	10.9	2.38876	14.67	2.6858	4	1.27	10.8
0	1	2	5	-2.46425	1	0	0	0	-99	-88	#NULL!	1	148	51463.7	4	62.05	6.125	-0.81	-1.71	-1.74	0.66	0.506818	0.81	-0.210721	0	126	113.8	4.73444	7.37	1.99742	#NULL!	0.98	13.5
9	1	2	8	1.18923	1	0	1	1	-99	-88	#NULL!	2	149	51011	4	62.2	6.725	0.49	-0.74	-0.16	#NULL!	#NULL!	#NULL!	#NULL!	#NULL!	#NULL!	#NULL!	#NULL!	#NULL!	#NULL!	#NULL!	#NULL!	14.2
3	1	2	7	-0.688758	1	1	1	1	-99	-88	#NULL!	1	149	51011	4	64.3	6.9	-0.35	-0.67	-0.7	0.42	0.350657	0.46	-0.776529	0	108	44.5	3.79549	7.02	1.94876	1	1.12	13.4
9	1	1	5	3.60182	0	0	1	1	-99	-88	#NULL!	2	149	51011	4	60.95	5.45	-1.29	-1.31	-1.87	0.22	0.198851	0.39	-0.941609	0	132	32.9	3.49347	9.55	2.25654	#NULL!	1.69	13.3
3	1	1	5	0.0633516	1	1	1	1	-99	-88	#NULL!	1	150	50560.3	4	64.05	6.925	-0.21	-0.81	-0.69	0.25	0.223144	0.38	-0.967584	0	124	18.2	2.90142	7.67	2.03732	#NULL!	1.12	12.9
3	2	2	2	-4.83525	0	0	1	1	-99	-88	#NULL!	2	151	50111.6	4	61.65	6.5	0.36	-1.04	-0.47	0.77	0.57098	0.52	-0.653926	0	130	73.3	4.29456	4.36	1.47247	#NULL!	0.86	12.5
3	1	2	6	-4.72168	1	0	1	1	-99	-88	#NULL!	1	151	50111.6	4	64	7.225	0.33	-0.87	-0.33	0.39	0.329304	0.54	-0.616186	0	107	19.5	2.97041	8.33	2.11986	3	0.96	12.5
3	2	2	7	2.4254	0	0	1	1	-99	-88	#NULL!	1	152	49664.8	4	67.15	6.725	-1.82	0.6	-0.99	0.17	0.157004	0.36	-1.02165	0	120	204.5	5.32057	5.55	1.7138	#NULL!	0.98	13.6
3	1	2	8	0.55598	1	0	1	1	-99	-88	#NULL!	1	152	49664.8	4	62.1	6.675	0.22	-1.8	-1.06	0.47	0.385262	0.47	-0.755023	0	113	20.9	3.03975	8.12	2.09433	#NULL!	0.82	14
3	1	2	7	-0.19753	0	0	1	1	-99	-88	#NULL!	1	152	49664.8	4	65.05	6	-2.43	-0.4	-1.99	0.08	0.076961	0.55	-0.597837	0	97	22.8	3.12676	12.26	2.50634	3	0.99	12.8
9	1	2	7	0.648315	1	0	1	0	-99	-88	#NULL!	2	153	49220.1	5	63.9	6.875	0.07	-0.08	-0.05	0.29	0.254642	0.47	-0.755023	0	111	22.9	3.13114	8.48	2.13771	#NULL!	0.87	13.1
9	1	2	5	-3.40044	1	0	1	1	-99	-88	#NULL!	2	154	48777.4	5	59.5	5.875	0.23	-2.09	-1.35	0.32	0.277632	0.57	-0.562119	0	91	146.4	4.98634	5.79	1.75613	1	1.37	12.6
0	1	1	5	-2.47679	0	0	1	1	-99	-88	#NULL!	2	155	48336.7	5	61.45	6.45	0.36	-1.24	-0.6	1.39	0.871293	0.88	-0.127833	0	96	29.9	3.39786	6.94	1.9373	1	0.79	12.3
9	1	1	5	-2.55383	0	0	0	0	-99	-88	#NULL!	1	155	48336.7	5	65.4	7.125	-0.41	-0.32	-0.53	0.26	0.231112	0.53	-0.634878	0	117	66.3	4.19419	7.58	2.02551	#NULL!	1.35	13
0	1	2	6	-0.208562	1	0	1	1	-99	-88	#NULL!	1	157	47461.3	5	65.4	7.25	-0.19	-0.37	-0.4	0.29	0.254642	0.47	-0.755023	0	93	48.9	3.88978	7.46	2.00956	1	1.12	13.4
0	1	2	8	0.285147	1	0	1	1	-99	-88	#NULL!	1	157	47461.3	5	60.95	6.325	0.13	-2.48	-1.63	1.12	0.751416	0.83	-0.18633	0	78	54.2	3.99268	18.77	2.93226	3	1.04	12.8
0	2	2	7	1.1091	0	0	1	0	-99	-88	#NULL!	2	160	46163.1	5	63.8	8.15	1.91	-0.31	1.23	0.66	0.506818	0.5	-0.693147	0	116	41.5	3.72569	5.93	1.78002	#NULL!	1.19	10.2
0	2	2	7	1.17374	1	0	1	1	-99	-88	#NULL!	1	160	46163.1	5	64.4	7.9	1.24	-0.93	0.32	2.24	1.17557	0.9	-0.105361	0	106	16.7	2.81541	9.95	2.29757	3	0.97	14.6
0	1	2	6	-2.70424	1	0	1	1	-99	-88	#NULL!	1	161	45734.4	5	64.1	6.625	-0.77	-1.1	-1.29	0.44	0.364643	0.45	-0.798508	0	112	14.1	2.64617	7.01	1.94734	#NULL!	0.76	12.5
0	1	2	5	-4.53238	0	0	1	0	-99	-88	#NULL!	2	162	45307.7	5	62.7	6.575	0.05	-0.85	-0.56	0.58	0.457425	0.72	-0.328504	0	112	19.6	2.97553	6.63	1.8916	#NULL!	0.88	13.4
3	1	1	9	2.79806	1	0	0	0	-99	-88	#NULL!	2	162	45307.7	5	63.2	5.775	-1.62	-0.63	-1.63	0.08	0.076961	0.62	-0.478036	0	127	112.6	4.72384	6.95	1.93874	#NULL!	1.4	14.4
6	2	2	4	-0.768352	0	0	1	0	-99	-88	#NULL!	2	163	44883	5	62.95	6.375	-0.4	-0.76	-0.83	1.43	0.887891	1.01	0.00995033	3	98.88	25.65	3.24454	6.3168	1.84321	1	0.79	12.7
9	1	2	7	1.34553	0	0	1	0	-99	-88	#NULL!	1	163	44883	5	65.4	7.25	-0.19	-0.54	-0.51	22.67	3.16421	1.28	0.24686	2	117.6	24.486	3.1981	8.1954	2.10357	#NULL!	1.08	12.5
3	1	2	8	-0.19235	1	0	1	1	-99	-88	#NULL!	1	165	44039.6	5	66.95	8.025	0.45	0.14	0.37	0.13	0.122218	0.45	-0.798508	0	119	39.9	3.68638	6.88	1.92862	#NULL!	1.36	10.7
9	1	2	5	3.73928	1	1	1	1	-99	-88	#NULL!	2	165	44039.6	5	63.1	6.75	0.18	-0.75	-0.38	2.31	1.19695	0.96	-0.040822	0	108	38.9	3.66099	8.98	2.195	3	1.2	13.2
3	2	2	6	2.7415	1	1	1	1	-99	-88	#NULL!	2	166	43620.9	5	66.15	7.425	0.12	0.59	0.37	1.93	1.075	0.74	-0.301105	0	116	22.8	3.12676	7.49	2.01357	#NULL!	1.15	11
12	1	2	8	3.2029	0	0	1	1	-99	-88	#NULL!	2	166	43620.9	5	63.65	6.175	-1.03	-0.52	-1.14	0.27	0.239017	0.58	-0.544727	0	107	32.7	3.48738	7.88	2.06433	1	1.16	10.9
9	2	1	5	0.388559	0	0	1	1	-99	-88	#NULL!	2	167	43204.2	5	61.15	5.875	-0.54	-1.66	-1.56	0.27	0.239017	0.48	-0.733969	0	106	26.3	3.26957	6.47	1.86718	1	0.92	11.7
6	1	2	6	-1.74993	1	0	1	0	-99	-88	#NULL!	2	167	43204.2	5	65.15	7.35	0.35	0.12	0.28	0.08	0.076961	0.47	-0.755023	0	112	17.3	2.85071	9	2.19722	#NULL!	1.15	11
3	2	1	9	1.93414	1	0	1	0	-99	-88	#NULL!	2	168	42789.4	5	60.1	5.75	-0.28	-2.16	-1.75	0.24	0.215111	0.58	-0.544727	0	108	104.3	4.64727	6.15	1.81645	1	1.44	11.6
9	1	1	9	1.76977	1	0	1	1	-99	-88	#NULL!	1	168	42789.4	5	64.55	8.025	1.35	-1.07	0.32	0	0	0.4	-0.916291	0	99	4.2	1.43508	9.85	2.28747	4	0.84	12
3	1	2	7	-0.910958	1	0	1	1	-99	-88	#NULL!	2	169	42376.7	5	61.1	6.25	0.17	-1.73	-1.08	0.38	0.322083	0.54	-0.616186	0	126	29.3	3.37759	6.52	1.87487	#NULL!	2.48	15.7
1	1	2	4	-2.55716	0	0	1	1	-99	-88	#NULL!	2	170	41966	5	64	7.125	0.42	-0.47	-0.02	0.33	0.285179	0.6	-0.510826	0	93	7.8	2.05412	16.79	2.82078	4	0.85	12.3
3	1	1	9	-1.08254	1	0	1	0	-99	-88	#NULL!	1	174	40343.2	5	65.65	6.825	-1.04	-0.71	-1.24	1.6	0.955511	0.7	-0.356675	0	105	41.8	3.7329	8.1	2.09186	1	1.1	13.5
3	1	2	4	-0.39153	0	0	1	1	-99	-88	#NULL!	1	174	40343.2	5	65.35	8.9	2.25	-0.85	1.19	0.48	0.392042	0.65	-0.430783	0	80	3.2	1.16315	17.88	2.88368	4	1.12	13
3	1	2	7	-2.02728	1	0	0	0	-99	-88	#NULL!	1	175	39942.5	5	64.1	6.075	-1.87	-1.46	-2.29	0.15	0.139762	1	0	0	100	150.1	5.0113	7.3	1.98787	1	0.84	11.9
9	1	1	9	1.25672	1	0	1	0	-99	-88	#NULL!	2	176	39543.8	5	62.4	6	-0.84	-1.32	-1.52	1.58	0.947789	1.23	0.207014	3	110.21	56.25	4.02981	7.7952	2.05351	#NULL!	1.02	12.9
3	1	2	7	-1.55526	0	0	1	1	-99	-88	#NULL!	1	176	39543.8	5	66.65	8.05	0.61	-0.29	0.23	2.25	1.17865	0.77	-0.261365	0	94	20.1	3.00072	8.06	2.08691	1	0.9	14.1
3	1	2	6	2.48176	1	0	1	0	-99	-88	#NULL!	1	176	39543.8	5	67.25	8.55	1.11	-0.01	0.79	1.7	0.993252	0.84	-0.174353	0	118	17.1	2.83908	8.18	2.10169	#NULL!	1	11.3
3	1	1	6	4.06621	1	0	1	0	-99	-88	#NULL!	1	176	39543.8	5	59.9	5.875	-0.19	-3.45	-2.6	0.23	0.207014	0.41	-0.891598	0	80	5.1	1.62924	19.72	2.98163	4	0.88	13.6
6	1	1	7	5.46443	1	0	1	1	-99	-88	#NULL!	2	177	39147	5	66.65	7.575	0.17	0.54	0.38	0.14	0.131028	0.45	-0.798508	0	122	85.9	4.45318	4.76	1.56025	#NULL!	1.26	13.7
9	1	1	4	-1.47224	1	1	1	1	-99	-88	#NULL!	1	178	38752.3	5	64.55	6.925	-0.41	-1.32	-1.17	0.11	0.10436	0.42	-0.867501	0	116	42.9	3.75887	5.83	1.76302	#NULL!	1.09	13.6
9	1	2	6	1.50354	0	0	1	1	-99	-88	#NULL!	1	178	38752.3	5	65.35	6.825	-0.92	-0.95	-1.3	0.11	0.10436	0.47	-0.755023	0	113	24.8	3.21084	7.26	1.98238	#NULL!	0.9	11.9
3	1	2	10	1.67294	1	0	1	1	-99	-88	#NULL!	2	179	38359.6	5	61.75	6.975	1.06	-1.68	-0.33	0	0	0.38	-0.967584	0	123	33.9	3.52342	6.86	1.92571	#NULL!	1.28	13.5
3	1	1	6	-0.938722	1	0	1	0	-99	-88	#NULL!	2	179	38359.6	5	63.1	6.325	-0.54	-1.08	-1.13	0.09	0.0861777	0.66	-0.415515	0	107	69.9	4.24707	9.16	2.21485	3	1.09	11.7
3	1	2	6	-4.25645	1	0	1	1	-99	-88	#NULL!	1	180	37968.9	5	66.6	7.45	-0.31	-0.41	-0.53	0.47	0.385262	1.01	0.00995033	3	118.45	242.475	5.4909	5.7024	1.74089	#NULL!	1.55	13.1
9	1	1	7	3.21524	1	0	1	1	-99	-88	#NULL!	2	180	37968.9	5	63.05	7.175	0.85	-1.12	-0.11	0.82	0.598837	0.39	-0.941609	0	111	20	2.99573	6.66	1.89612	#NULL!	0.82	13
6	1	2	4	4.33839	1	0	1	0	-99	-88	#NULL!	2	180	37968.9	5	61.3	5.45	-1.45	-1.9	-2.38	0.14	0.131028	0.44	-0.820981	0	91	16.9	2.82731	7.73	2.04511	1	1.07	11
3	1	2	9	-0.753413	0	0	1	0	-99	-88	#NULL!	1	180	37968.9	5	62.35	7.125	0.88	-2.4	-0.94	1.46	0.900161	1.17	0.157004	3	117.42	19.425	2.96656	7.872	2.06331	#NULL!	1.14	12.4
0	1	2	4	-1.89385	1	0	1	-88	-99	0	9	2	183	36808.8	6	61.55	5.225	-2.07	-1.85	-2.79	0.62	0.482426	0.59	-0.527633	0	107	30.1	3.40453	7.11	1.9615	1	1.06	12.6
3	1	1	4	1.78548	1	0	1	-88	-99	0	3	1	183	36808.8	6	67.95	8.325	0.54	0.14	0.43	1.12	0.751416	1.48	0.392042	3	117.42	145.275	4.97863	7.5744	2.02477	#NULL!	1.13	11
0	1	2	8	0.563157	1	1	1	-88	-99	0	3	2	183	36808.8	6	65.95	7.525	0.33	0.09	0.24	0.62	0.482426	0.5	-0.693147	0	114	29.6	3.38777	8.29	2.11505	#NULL!	1.18	14.2
3	1	2	3	2.9251	0	0	1	-88	-99	0	8	1	183	36808.8	6	69.65	7.625	-1.12	0.94	-0.37	13.66	2.68512	1.46	0.378436	2	114.24	32.065	3.46777	9.7527	2.27754	#NULL!	1.06	11.6
3	1	2	5	-3.28891	1	0	1	-88	-99	0	3	2	183	36808.8	6	66.3	8.5	1.52	0.24	1.24	0.5	0.405465	0.7	-0.356675	0	87	8	2.07944	14.72	2.68921	4	1.19	13.1
6	2	1	7	-2.66061	1	0	1	-88	-99	0	4	2	184	36426.1	6	61.1	6.725	0.95	-2.07	-0.7	0.17	0.157004	0.69	-0.371064	0	103	108.2	4.68398	8.2	2.10413	1	0.97	13.3
0	1	2	5	-2.37768	1	0	1	-88	-99	1	8	1	184	36426.1	6	67.45	8.1	0.39	-0.12	0.17	5.13	1.81319	0.73	-0.314711	1	106.92	9.471	2.24823	13.6063	2.61053	4	0.98	15.2
3	1	2	7	0.401387	1	0	1	-88	-99	0	3	2	185	36045.3	6	63.25	8.2	2.17	-1.15	0.92	8.34	2.23431	0.64	-0.446287	1	108.9	8.008	2.08044	6.1594	1.81798	2	0.98	13.5
3	1	2	6	2.8731	1	0	1	-88	-99	0	6	1	185	36045.3	6	67.95	6.75	-2.06	0.09	-1.5	1.24	0.806476	0.77	-0.261365	0	118	114.8	4.74319	6.17	1.8197	#NULL!	0.99	13.8
9	2	2	6	1.05611	1	0	1	-88	-99	0	3	1	185	36045.3	6	61.35	7.1	1.31	-2.99	-1.04	1.19	0.783902	1.31	0.270027	3	119.48	10.35	2.33699	10.3776	2.33965	#NULL!	1.21	14
3	1	2	7	-2.4957	0	0	1	-88	-99	1	8	2	185	36045.3	6	62.75	6.175	-0.67	-1.37	-1.42	0.03	0.0295588	0.4	-0.916291	0	102	20.6	3.02529	6.79	1.91545	1	1.11	13.5
3	2	2	7	1.58832	0	0	1	-88	-99	1	7	1	186	35666.6	6	65.95	8.3	1.23	-0.86	0.36	0.36	0.307485	0.59	-0.527633	0	116	9.8	2.28238	8.89	2.18493	#NULL!	1.18	14.3
3	2	2	7	2.73902	0	0	1	-88	-99	0	6	2	187	35289.9	6	66.9	6.725	-1.24	0.41	-0.74	19.59	3.02481	1.08	0.076961	2	123.2	38.372	3.64733	5.2461	1.65748	#NULL!	0.71	13
0	1	2	7	-3.34975	1	0	1	-88	-99	0	7	2	187	35289.9	6	62.1	6.175	-0.4	-1.7	-1.44	6.82	2.05668	1.18	0.165514	2	116.48	124.126	4.8213	7.0383	1.95137	#NULL!	0.86	12.5
3	1	2	10	-2.54358	1	0	1	-88	-99	1	10	1	188	34915.2	6	66.35	8.275	1.04	-0.73	0.3	1.33	0.845868	0.87	-0.139262	0	96	31.5	3.44999	10	2.30259	3	0.62	11.9
3	1	2	8	0.0645741	1	0	1	-88	-99	1	7	1	188	34915.2	6	65.45	7.675	0.48	-1.14	-0.39	1.46	0.900161	0.54	-0.616186	0	119	27.2	3.30322	6.02	1.79509	#NULL!	0.84	13.9
3	1	2	9	0.798064	1	0	1	-88	-99	1	10	2	190	34171.8	6	66.6	6.9	-0.84	0.21	-0.56	0.33	0.285179	0.6	-0.510826	0	117	23.9	3.17388	8.05	2.08567	#NULL!	0.99	13.5
3	2	2	8	1.08579	1	0	1	-88	-99	0	7	2	191	33803.1	6	60.2	5.65	-0.53	-2.62	-2.23	0.33	0.285179	0.66	-0.415515	0	105	37.8	3.63231	6.9	1.93152	1	1.27	13.6
3	1	2	8	-2.38216	1	1	1	-88	-99	0	7	1	191	33803.1	6	64.9	6.525	-1.3	-1.47	-1.89	0.15	0.139762	0.59	-0.527633	0	108	19.8	2.98568	7.9	2.06686	1	1.32	13.7
3	1	2	10	6.77785	1	0	1	-88	-99	0	3	1	191	33803.1	6	65.1	7.3	0.02	-1.38	-0.88	0.2	0.182322	0.59	-0.527633	0	111	15.1	2.71469	8.27	2.11263	#NULL!	0.96	12.9
6	2	2	5	-3.24509	1	0	1	-88	-99	0	7	1	191	33803.1	6	68.1	7.975	-0.03	0.02	-0.08	8.51	2.25234	1.06	0.0582689	2	97.44	12.084	2.49188	12.4845	2.52449	3	0.88	13.5
3	1	1	6	5.51625	1	0	1	-88	-99	0	6	1	191	33803.1	6	67.65	6.975	-1.54	-0.19	-1.29	8.97	2.29958	0.86	-0.150823	1	76.23	7.7	2.04122	23.5561	3.15938	4	0.88	12.9
0	1	2	8	4.97677	1	0	1	-88	-99	1	9	1	191	33803.1	6	64	7.075	0.08	-1.89	-1.17	0.19	0.173953	0.5	-0.693147	0	112	45.2	3.8111	7.4	2.00148	#NULL!	1.34	12.6
12	1	2	7	-1.48009	1	0	1	-88	-99	0	5	1	192	33436.4	6	66.7	7.1	-0.95	-0.66	-1.14	0.03	0.0295588	0.47	-0.755023	0	115	5.1	1.62924	8.56	2.1471	#NULL!	0.84	12.3
3	1	2	6	1.58785	1	0	1	-88	-99	0	7	1	192	33436.4	6	66.15	7.45	-0.14	-0.91	-0.71	0.34	0.29267	0.81	-0.210721	0	91	43.2	3.76584	9.22	2.22138	3	1.01	13.1
9	1	2	9	0.25936	1	0	1	-88	-99	0	6	2	193	33071.6	6	62.75	6.6	0.08	-1.54	-0.97	0.74	0.553885	0.79	-0.235722	0	106	157.4	5.05879	6.72	1.90509	1	1.22	14.3
6	1	2	9	-1.31319	0	0	1	-88	-99	0	4	1	194	32708.9	6	64.25	6.45	-1.16	-1.84	-2.03	0.12	0.113329	0.43	-0.84397	0	116	21.9	3.08649	7.24	1.97962	#NULL!	1.41	14.2
0	2	2	5	-4.71357	0	1	1	-88	-99	1	8	2	194	32708.9	6	64.3	7.25	0.51	-0.89	-0.2	1.52	0.924259	1	0	0	93	13.8	2.62467	9	2.19722	3	1.18	10.8
3	1	2	5	-3.58588	1	1	1	-88	-99	1	8	1	194	32708.9	6	70.55	7.875	-1.02	1.08	-0.24	0.04	0.0392207	0.58	-0.544727	0	99	9.1	2.20827	13.41	2.596	4	0.94	12.4
3	1	2	5	2.41169	1	1	0	-88	-99	1	6	2	194	32708.9	6	64.9	6.975	-0.14	-0.62	-0.53	0.4	0.336472	0.49	-0.71335	0	101	68.9	4.23266	7.15	1.96711	1	1.15	#NULL!
9	1	2	9	-3.35653	1	1	1	-88	-99	1	9	1	195	32348.2	6	64.1	7.05	0	-1.94	-1.25	3.93	1.59534	0.91	-0.0943107	0	101	17	2.83321	9.19	2.21812	3	0.94	12.4
3	1	2	6	-1.2674	0	0	1	-88	-99	0	8	2	196	31989.5	6	65.05	7.8	1.02	-0.6	0.37	2.45	1.23837	0.66	-0.415515	0	104	77.2	4.3464	6.66	1.89612	1	0.99	11.8
3	1	1	8	5.55445	1	1	1	-88	-99	1	9	1	197	31632.8	6	70.6	9.025	0.63	1.04	0.98	4.83	1.76302	0.96	-0.040822	0	96	14.3	2.66026	8.38	2.12585	3	0.82	12.8
9	1	2	7	-4.72168	1	0	1	-88	-99	1	7	2	197	31632.8	6	62.05	5.525	-1.64	-1.93	-2.51	1.3	0.832909	0.74	-0.301105	0	102	15.3	2.72785	9.13	2.21157	3	0.85	12.2
3	1	2	9	-3.23548	0	0	1	-88	-99	0	6	1	198	31278.1	6	64.6	7.425	0.41	-1.77	-0.83	1.07	0.727549	0.8	-0.223144	0	112	23.8	3.16969	8.75	2.16905	#NULL!	0.85	14.5
9	1	2	8	0.946885	1	0	1	-88	-99	1	8	1	198	31278.1	6	65.65	7.425	0	-1.28	-0.83	11.02	2.48657	1.16	0.14842	2	104.16	5.936	1.78104	13.4763	2.60093	4	0.95	11.1
0	1	2	7	0.410941	1	0	1	-88	-99	0	3	1	200	30574.7	6	67.95	7.125	-1.38	-0.26	-1.22	0.33	0.285179	0.44	-0.820981	0	92	93.4	4.53689	6.2	1.82455	1	1.03	13.1
3	2	2	6	0.722085	1	1	1	-88	-99	0	8	2	200	30574.7	6	65.1	7.475	0.55	-0.67	-0.03	0.05	0.0487902	0.41	-0.891598	0	96	33.1	3.49953	14.21	2.65395	3	1.07	9.1
6	1	2	7	-4.20783	1	0	1	-88	-99	0	6	1	203	29534.5	6	66	7.575	0.11	-1.24	-0.71	#NULL!	#NULL!	#NULL!	#NULL!	#NULL!	#NULL!	#NULL!	#NULL!	#NULL!	#NULL!	#NULL!	#NULL!	12.1
3	1	1	10	0.448268	1	0	1	-88	-99	0	3	2	203	29534.5	6	64.7	6.7	-0.5	-0.91	-0.97	4.1	1.62924	0.96	-0.040822	0	109	93.7	4.5401	6.21	1.82616	1	0.91	13
3	1	2	7	-0.113053	1	0	1	-88	-99	1	8	1	203	29534.5	6	72.2	8.5	-0.58	1.63	0.35	0	0	0.47	-0.755023	0	111	11.1	2.40695	10.41	2.34277	#NULL!	1.33	12.6
3	1	2	5	-1.26345	0	0	1	-88	-99	1	8	2	203	29534.5	6	67	8.075	0.75	0.09	0.56	2.08	1.12493	1.3	0.262364	3	111.24	230.175	5.43884	8.9664	2.19348	#NULL!	1.36	12.1
6	1	2	8	0.195537	1	0	1	-88	-99	1	10	2	204	29191.8	6	66.45	7.075	-0.52	-0.17	-0.53	0.27	0.239017	0.48	-0.733969	0	107	9.2	2.2192	7.65	2.03471	2	0.99	11.5
0	1	2	8	5.33039	1	0	1	-88	-99	1	8	2	205	28851.1	6	65.5	6.675	-0.84	-0.6	-1.03	0.57	0.451076	0.62	-0.478036	0	111	33.1	3.49953	9.14	2.21266	#NULL!	1.03	13.8
3	1	2	6	2.10051	1	0	1	-88	-99	1	9	2	206	28512.4	6	61.45	6.275	0.05	-2.38	-1.56	0.23	0.207014	0.56	-0.579818	0	99	55.6	4.01818	5.8	1.75786	1	1.09	12
3	2	1	6	5.826	1	0	1	-88	-99	1	7	2	206	28512.4	6	67.4	7.725	0.15	0.2	0.17	7.98	2.195	1.2	0.182322	2	125.44	30.74	3.42556	6.6468	1.89414	#NULL!	1.22	13.5
3	1	2	9	-2.43934	1	1	1	-88	-99	1	9	1	207	28175.7	6	67.75	7.2	-1.16	-0.52	-1.21	0.19	0.173953	0.62	-0.478036	0	99	17.6	2.8679	10.87	2.38601	3	0.97	13.3
3	1	2	8	5.19119	0	0	1	-88	-99	1	8	1	208	27841	6	62.55	5.925	-1.47	-2.94	-2.97	13.81	2.6953	1.31	0.270027	2	109.76	23.585	3.16061	5.8725	1.77028	1	0.77	14
3	1	1	7	-1.30905	0	0	1	-88	-99	1	9	1	208	27841	6	71.3	8.25	-0.67	1.1	0.01	4.11	1.6312	0.71	-0.34249	0	113	30.5	3.41773	7.24	1.97962	#NULL!	1.05	13
3	2	2	9	-2.31201	0	0	1	-88	-99	0	7	2	209	27508.2	6	64.95	7.075	0	-0.93	-0.59	0.17	0.157004	0.51	-0.673345	0	105	62.3	4.13196	6.01	1.79342	1	0.77	12
3	1	2	9	1.40272	1	0	1	-88	-99	1	7	1	211	26848.8	6	70.1	10.475	2.51	0.48	2.19	1.67	0.982078	0.74	-0.301105	0	96	27.6	3.31782	8.32	2.11866	3	1	11.1
3	1	2	10	-0.0795104	0	0	1	-88	-99	1	8	2	212	26522.1	6	65.65	6.25	-1.64	-0.68	-1.66	0.06	0.0582689	0.78	-0.248461	0	106	34.7	3.54674	6.83	1.92132	1	1.07	11.8
3	1	2	8	-2.13539	1	0	1	-88	-99	1	10	1	212	26522.1	6	63.5	5.825	-2.13	-2.59	-3.16	4.15	1.639	0.87	-0.139262	0	90	27	3.29584	8.12	2.09433	1	0.99	14.5
3	1	2	6	1.05499	1	1	1	-88	-99	0	9	1	213	26197.4	7	66.95	6.55	-2.07	-1.02	-2.14	1.29	0.828552	0.73	-0.314711	0	106	55	4.00733	6.69	1.90061	1	0.84	10.8
3	2	1	6	-2.46128	1	1	1	-88	-99	0	6	1	213	26197.4	7	64.25	6.85	-0.41	-2.26	-1.74	0.86	0.620576	0.63	-0.462035	0	89	6.4	1.8563	16.57	2.80759	4	0.87	11.7
0	1	1	7	5.91681	1	0	1	-88	-99	1	9	1	213	26197.4	7	67.4	6.85	-1.67	-0.81	-1.74	1.81	1.03318	0.88	-0.127833	0	106	86.1	4.45551	6.93	1.93586	1	1.1	13.3
3	1	1	4	6.0506	1	0	1	-88	-99	1	9	1	213	26197.4	7	71	8.85	0.28	0.85	0.59	0.17	0.157004	0.73	-0.314711	0	101	12.4	2.5177	9.38	2.23858	3	1.07	11.7
3	1	2	4	-0.319621	1	0	1	-88	-99	1	8	2	214	25874.7	7	66.5	6.35	-1.76	-0.36	-1.55	1.3	0.832909	0.52	-0.653926	0	95	97.4	4.57883	4.72	1.55181	1	1.06	11.4
12	1	2	5	-0.97302	1	0	1	-88	-99	1	9	1	214	25874.7	7	63.5	6.575	-0.6	-2.63	-2.12	0.25	0.223144	0.59	-0.527633	0	100	43.8	3.77963	7.47	2.01089	1	1.72	14.8
3	1	2	6	-2.47368	1	1	1	-88	-99	1	9	2	214	25874.7	7	76.95	9.1	-0.49	4.15	1.41	0.77	0.57098	0.77	-0.261365	0	103	7.7	2.04122	14.11	2.64688	4	1.09	12.2
9	2	2	7	-4.49993	1	0	1	-88	-99	0	3	2	215	25554	7	63.1	6.65	0.02	-1.85	-1.17	2.36	1.21194	0.88	-0.127833	0	84	3.1	1.1314	17.82	2.88032	4	1.14	12.6
0	1	2	6	2.38964	1	0	1	-88	-99	0	7	2	216	25235.3	7	64.45	7.3	0.53	-1.29	-0.41	0.63	0.48858	0.77	-0.261365	0	112	18.6	2.92316	8.58	2.14943	#NULL!	1.13	12.3
0	1	2	8	4.24367	1	0	1	-88	-99	1	9	1	217	24918.6	7	63.85	7.875	1.41	-2.53	-0.53	0.92	0.652325	0.48	-0.733969	0	105	44.3	3.79098	6.77	1.9125	1	1.06	14.5
9	1	2	7	-1.46944	1	1	1	-88	-99	0	2	1	218	24603.8	7	67.15	8.275	0.75	-1.04	-0.09	0.23	0.207014	0.52	-0.653926	0	120	8.7	2.16332	9.63	2.26488	#NULL!	1.05	13.2
0	1	2	8	2.95854	1	0	1	-88	-99	1	8	2	218	24603.8	7	64.4	5.625	-2.41	-1.35	-2.62	34.31	3.56417	1.69	0.524729	2	72.8	78.387	4.36166	6.1248	1.81235	1	1.1	12.1
9	1	1	7	-0.0865787	0	0	1	-88	-99	0	8	2	219	24291.1	7	60.95	6.15	0.06	-2.85	-1.87	4.76	1.75094	1.25	0.223144	3	127.72	265.425	5.58133	4.3296	1.46548	#NULL!	1.28	11.9
9	1	2	9	-3.77904	0	0	1	-88	-99	0	5	1	219	24291.1	7	69.1	9.925	2.22	-0.16	1.58	0.82	0.598837	0.79	-0.235722	0	107	12.3	2.5096	7.56	2.02287	1	1.02	14
0	2	2	6	-4.94233	0	1	1	-88	-99	1	9	1	222	23365	7	68.7	7.7	-0.66	-0.41	-0.79	3.66	1.53902	1.42	0.350657	3	99.91	41.25	3.71965	13.6032	2.61031	3	0.76	13.3
3	1	2	8	-3.0252	1	0	1	-88	-99	1	9	1	222	23365	7	70.15	9.1	0.88	0.25	0.74	0.28	0.24686	1.24	0.215111	3	97.85	7.575	2.02485	17.0208	2.83444	4	1.08	13.8
3	1	2	7	2.51284	1	0	1	-88	-99	1	10	2	223	23060.3	7	66.55	6.475	-1.56	-0.52	-1.49	1.33	0.845868	0.99	-0.0100503	0	95	21.7	3.07731	13.18	2.5787	3	0.87	12.2
3	1	1	7	3.93257	1	1	1	-88	-99	1	7	1	223	23060.3	7	65.65	7.175	-0.42	-1.83	-1.45	0.34	0.29267	0.64	-0.446287	0	119	81.8	4.40428	15.63	2.74919	#NULL!	1.63	13
0	1	2	7	-0.677906	1	0	1	-88	-99	1	8	1	224	22757.6	7	63.4	6.675	-0.37	-2.88	-2.11	0.27	0.239017	0.56	-0.579818	0	83	3.6	1.28093	30	3.4012	4	1.37	13.8
9	1	2	9	-0.207972	1	0	1	-88	-99	1	8	1	224	22757.6	7	71.75	9.35	0.71	0.94	0.97	0.32	0.277632	0.96	-0.040822	0	106	96.2	4.56643	15.85	2.76317	3	1.95	13.5
3	1	1	11	5.68542	1	0	1	-88	-99	0	7	1	225	22456.9	7	71.35	8.55	-0.25	0.74	0.13	0	0	0.48	-0.733969	0	119	22.3	3.10459	7.16	1.96851	#NULL!	1.43	12.1
9	1	2	8	-2.13785	1	1	1	-88	-99	1	8	1	226	22158.1	7	65.95	6.85	-1.11	-1.75	-1.89	1.62	0.963174	0.65	-0.430783	0	97	31.3	3.44362	5.65	1.73166	1	0.86	11.7
3	1	1	9	3.19469	1	0	1	-88	-99	1	9	2	226	22158.1	7	66.05	8.2	1.22	-0.8	0.43	0.82	0.598837	0.49	-0.71335	0	103	23.3	3.14845	6.98	1.94305	1	1.16	12.8
3	1	2	8	0.56399	1	0	1	-88	-99	1	7	2	226	22158.1	7	64.3	6.3	-1.05	-1.55	-1.75	5.55	1.87947	1.2	0.182322	2	110.88	17.066	2.83709	7.4385	2.00667	#NULL!	0.94	13.6
3	1	2	2	-4.20783	1	0	1	-88	-99	0	6	2	227	21861.4	7	65.1	6.65	-0.73	-1.23	-1.31	0.59	0.463734	0.73	-0.314711	0	108	26.9	3.29213	7.32	1.99061	1	0.82	11.6
9	1	2	7	-3.81724	0	0	1	-88	-99	0	6	1	227	21861.4	7	68.55	8.6	0.73	-0.59	0.16	1.57	0.943906	0.97	-0.0304592	0	102	27.4	3.31054	14.55	2.67759	3	0.79	12.2
3	1	2	5	-1.54566	1	0	1	-88	-99	0	6	1	228	21566.7	7	68.75	8.775	0.9	-0.52	0.33	0.14	0.131028	0.46	-0.776529	0	97	39	3.66356	8.97	2.19389	3	1.69	12
3	1	2	8	-2.40313	1	0	1	-88	-99	1	9	1	228	21566.7	7	67.95	8.325	0.54	-0.88	-0.15	2.57	1.27257	0.82	-0.198451	0	102	53.3	3.97594	7.55	2.02155	1	1	13.7
3	2	2	9	3.15849	1	0	1	-88	-99	0	6	1	230	20983.3	7	70.95	8.1	-0.79	0.45	-0.42	0.23	0.207014	1.12	0.113329	3	111.24	94.35	4.54701	7.0752	1.9566	#NULL!	1.17	11.5
6	1	2	9	-1.89326	1	1	1	-88	-99	1	8	1	230	20983.3	7	65.4	8.125	1.17	-2.09	-0.4	0.31	0.270027	0.56	-0.579818	0	109	13.5	2.60269	8.93	2.18942	3	0.98	12.7
9	1	1	10	7.26043	1	0	1	-88	-99	1	8	2	232	20407.9	7	66.45	8.575	1.56	-0.75	0.73	5.3	1.84055	1.08	0.076961	2	115.36	10.176	2.32003	10.788	2.37843	#NULL!	1.1	13.4
9	1	1	7	-0.416884	1	0	1	-88	-99	1	8	1	232	20407.9	7	72.6	8.675	-0.46	1.16	0.18	0.63	0.48858	0.64	-0.446287	0	97	8.2	2.10413	11.87	2.47401	4	1.1	12.9
3	1	2	7	0.545794	0	0	1	-88	-99	1	9	1	233	20123.2	7	72.5	8.65	-0.45	1.09	0.15	0.38	0.322083	0.39	-0.941609	0	101	12.1	2.49321	18.14	2.89812	3	1.07	12
6	1	2	7	-2.51135	1	1	1	-88	-99	0	5	1	234	19840.4	7	69.4	7.525	-1.2	-0.35	-1.14	0.96	0.672944	0.79	-0.235722	0	80	16.8	2.82138	7.23	1.97824	1	1.13	11.5
3	1	2	6	-1.16911	0	0	1	-88	-99	1	9	2	234	19840.4	7	63	5.925	-1.24	-2.26	-2.36	0	0	0.49	-0.71335	0	79	59.8	4.09101	7.74	2.0464	1	1.11	13.7
9	1	1	7	12.4767	1	1	1	-88	-99	1	10	1	235	19559.7	7	68	7.375	-0.96	-1.01	-1.33	0.18	0.165514	0.48	-0.733969	0	112	11.9	2.47654	7.96	2.07443	#NULL!	0.96	11
9	1	1	9	8.78657	1	1	1	-88	-99	1	8	1	235	19559.7	7	70.35	8.55	0.07	0.07	0.02	0.32	0.277632	0.64	-0.446287	0	109	14.6	2.68102	8.67	2.15987	3	0.85	11.9
3	1	2	7	1.42977	1	0	0	-88	-99	1	6	2	235	19559.7	7	66.9	8.675	1.54	-0.62	0.79	1.8	1.02962	1.12	0.113329	3	107.12	127.125	4.84517	4.7808	1.56461	1	1.5	#NULL!
12	1	2	6	2.3675	0	0	1	-88	-99	0	6	2	236	19281	7	66.3	7.2	-0.26	-0.89	-0.74	0.02	0.0198026	0.35	-1.04982	0	111	17.1	2.83908	6.28	1.83737	#NULL!	1.04	14.5
9	1	2	3	1.22172	1	0	1	-88	-99	0	7	2	236	19281	7	61.95	6.65	0.48	-2.74	-1.4	0.4	0.336472	0.63	-0.462035	0	108	6.5	1.8718	15.09	2.71403	4	1.14	11.6
3	1	2	8	1.30232	1	0	1	-88	-99	0	5	2	237	19004.3	7	62.4	6.425	-0.09	-2.57	-1.71	0.79	0.582216	0.63	-0.462035	0	109	66.6	4.1987	6.35	1.84845	1	1.49	14.1
3	2	2	5	2.81838	0	0	1	-88	-99	0	7	2	237	19004.3	7	63.8	7.05	0.39	-1.97	-0.93	0.51	0.41211	0.55	-0.597837	0	85	20.3	3.01062	9.41	2.24177	3	0.95	11.7
0	1	2	6	-2.51741	1	0	1	-88	-99	0	6	1	237	19004.3	7	65.4	7.7	0.54	-2.23	-0.96	1.45	0.896088	0.77	-0.261365	0	108	13.1	2.57261	9.84	2.28646	3	0.92	11.2
3	1	2	7	6.6003	1	0	1	-88	-99	1	8	1	240	18186.2	7	69	7.9	-0.45	-0.65	-0.76	0.12	0.113329	0.73	-0.314711	0	106	29.1	3.37074	9.51	2.25234	3	1.87	13.8
9	1	2	9	3.76081	1	1	1	-88	-99	1	8	2	240	18186.2	7	67.45	8.25	0.85	-0.48	0.34	2.91	1.36354	0.76	-0.274437	0	96	60.1	4.09601	9.75	2.27727	3	1.03	11.6
9	1	2	6	1.2691	1	0	1	-88	-99	1	9	1	241	17917.5	7	70.45	8.975	0.61	-0.02	0.4	12.63	2.61227	1.26	0.231112	2	99.68	11.607	2.45161	12.8934	2.55672	4	1.21	12.4
0	2	2	4	-3.82009	1	0	1	-88	-99	0	7	1	242	17650.7	7	64.5	6.275	-1.63	-2.74	-2.86	1.99	1.09527	0.94	-0.0618754	0	81	8.8	2.17475	12.49	2.52493	4	0.81	13.7
0	1	1	8	5.70335	1	0	1	-88	-99	1	9	2	242	17650.7	7	63.45	6.5	-0.37	-2.21	-1.66	0.57	0.451076	0.62	-0.478036	0	112	47.4	3.85862	6.5	1.8718	#NULL!	1.44	13.3
3	1	2	7	2.38537	0	0	1	-88	-99	1	9	2	242	17650.7	7	68.45	7.925	0.11	-0.1	-0.01	0.55	0.438255	0.46	-0.776529	0	104	4.4	1.4816	8.1	2.09186	2	1.12	14.1
3	2	2	6	-3.1779	1	0	1	-88	-99	0	8	1	243	17386	7	73.75	7.95	-1.87	1.44	-0.73	10.54	2.44582	1.19	0.173953	2	95.2	26.553	3.27914	5.3331	1.67393	1	0.84	11.1
0	1	2	5	-2.97578	1	1	1	-88	-99	0	7	1	243	17386	7	72.6	9.975	1.22	0.92	1.36	5.75	1.90954	1.38	0.322083	2	103.04	13.038	2.56787	13.8504	2.62831	3	0.7	10.7
0	1	2	6	-3.44779	1	0	1	-88	-99	1	9	2	243	17386	7	69.45	7.925	-0.18	0.31	-0.02	0.06	0.0582689	0.34	-1.07881	0	106	3.2	1.16315	6.17	1.8197	2	0.92	12.6
3	1	2	4	2.10016	0	0	1	-88	-99	1	10	2	243	17386	7	68.95	7.1	-1.27	0.09	-0.93	0.16	0.14842	0.55	-0.597837	0	104	6.6	1.88707	8.55	2.14593	4	0.9	12.1
15	2	2	7	1.33825	1	0	1	-88	-99	1	8	1	243	17386	7	69.3	7.8	-0.71	-0.58	-0.9	0.43	0.357674	0.43	-0.84397	0	105	6.1	1.80829	13.9	2.63189	4	0.7	11.8
0	1	2	6	0.684581	0	0	1	-88	-99	1	9	1	243	17386	7	67.5	9.775	2.56	-1.4	1.17	0.04	0.0392207	0.53	-0.634878	0	91	4.1	1.41099	15.78	2.75874	4	1	11.2
6	1	2	7	-1.08464	1	0	1	-88	-99	0	8	1	244	17123.3	8	69.5	8.2	-0.16	-0.51	-0.46	0.73	0.548121	0.74	-0.301105	0	95	4.9	1.58924	14.73	2.68989	4	1.02	14.1
9	2	2	9	1.97739	1	0	1	-88	-99	1	8	1	244	17123.3	8	67.4	7.15	-1.12	-1.46	-1.7	0.22	0.198851	0.6	-0.510826	0	114	7.9	2.06686	7.32	1.99061	#NULL!	1	13.9
0	1	2	8	-3.03199	1	0	1	-88	-99	0	5	2	245	16862.6	8	64.3	5.525	-2.59	-1.91	-3.08	3.44	1.49065	1.29	0.254642	3	115.36	43.2	3.76584	5.8368	1.76418	#NULL!	1.21	12.8
0	1	2	9	-3.39242	1	1	1	-88	-99	1	8	2	245	16862.6	8	66.65	6.375	-1.78	-0.92	-1.86	4.04	1.61741	0.86	-0.150823	0	98	79.8	4.37952	8.16	2.09924	1	1.03	13.7
0	1	2	6	-3.73444	1	0	1	-88	-99	1	9	1	245	16862.6	8	69.05	7.425	-1.25	-0.73	-1.38	0.12	0.113329	0.5	-0.693147	0	112	7.8	2.05412	8.26	2.11142	#NULL!	0.94	11.7
3	1	1	5	-0.0865787	1	0	1	-88	-99	1	9	2	245	16862.6	8	68	7.825	0.11	-0.35	-0.15	0	0	0.57	-0.562119	0	102	9.6	2.26176	9.83	2.28544	4	1.53	11
3	1	2	8	3.95762	1	0	1	-88	-99	1	9	1	245	16862.6	8	67.7	7.275	-1.02	-1.34	-1.56	0.03	0.0295588	0.39	-0.941609	0	94	5.7	1.74047	19.92	2.99172	4	1.02	13.9
3	1	2	6	0.129661	1	1	1	-88	-99	1	8	1	245	16862.6	8	76.7	8.15	-2.34	2.73	-0.52	0.37	0.314811	0.73	-0.314711	0	94	4.2	1.43508	19.38	2.96424	4	1.07	14
12	1	1	10	0.53391	1	0	1	-88	-99	1	10	1	246	16603.9	8	68.4	6.925	-1.91	-1.05	-2.02	0.75	0.559616	0.91	-0.0943107	0	91	5.4	1.6864	8.45	2.13417	4	0.87	13
0	1	2	7	-1.32552	1	0	1	-88	-99	1	9	2	247	16347.2	8	64.8	6.9	-0.21	-1.74	-1.21	0.23	0.207014	0.49	-0.71335	0	106	8	2.07944	7.53	2.0189	2	1.39	13.6
3	1	2	8	-0.97078	1	0	1	-88	-99	1	9	2	247	16347.2	8	68.35	6.65	-1.84	-0.24	-1.52	0.51	0.41211	0.66	-0.415515	0	103	18.1	2.89591	5.13	1.63511	1	0.77	12.3
3	1	2	6	-0.998552	1	0	1	-88	-99	0	9	1	249	15839.8	8	69.3	8.575	0.44	-0.7	-0.11	1.73	1.0043	0.87	-0.139262	0	85	9.3	2.23001	16.04	2.77509	4	1	14.6
3	1	2	6	-0.895336	0	0	1	-88	-99	1	8	1	249	15839.8	8	70.75	8.55	-0.06	-0.05	-0.13	0.07	0.0676586	0.32	-1.13943	0	95	4.6	1.52606	21.14	3.05117	4	0.75	12
0	1	2	7	0.745511	1	0	1	-88	-99	1	10	1	250	15589	8	71.1	8.7	0.04	0.09	0.02	0.66	0.506818	0.54	-0.616186	0	105	7.3	1.98787	11.06	2.40333	4	1.05	13.4
3	1	1	5	-3.31519	0	0	1	-88	-99	0	6	2	251	15340.3	8	65	7.05	-0.05	-1.72	-1.07	0.7	0.530628	0.69	-0.371064	0	98	110.9	4.70863	7.57	2.02419	1	0.98	12
3	1	2	7	3.43895	0	0	1	-88	-99	0	7	1	251	15340.3	8	71	8.4	-0.35	0.03	-0.31	0.64	0.494696	0.67	-0.400478	0	92	4.2	1.43508	14.14	2.64901	4	0.81	12.7
0	1	2	9	-2.02796	1	1	1	-88	-99	1	-99	2	251	15340.3	8	67.65	7.9	0.32	-0.61	-0.12	0.46	0.378436	0.75	-0.287682	0	104	11.8	2.4681	13.74	2.62031	4	1.15	11.3
9	1	1	6	2.54433	0	0	1	-88	-99	0	-99	2	252	15093.6	8	65.3	6.625	-0.86	-1.62	-1.6	0.63	0.48858	1.28	0.24686	3	114.33	90.525	4.50563	6.5472	1.87904	#NULL!	1.21	13.3
0	1	2	6	-2.13005	1	1	1	-88	-99	0	7	1	252	15093.6	8	68.5	8.55	0.68	-1.12	-0.16	0.44	0.364643	0.51	-0.673345	0	82	12.7	2.5416	7.2	1.97408	1	0.84	11.1
3	2	2	8	0.419844	1	0	1	-88	-99	1	8	2	253	14848.9	8	68.6	7.25	-0.92	-0.25	-0.85	0.33	0.285179	0.72	-0.328504	0	106	14.9	2.70136	15.14	2.71734	3	1.16	11.9
3	1	2	8	3.40399	0	1	1	-88	-99	0	4	1	254	14606.2	8	68.05	7.2	-1.27	-1.37	-1.74	1.43	0.887891	0.8	-0.223144	0	118	40.6	3.70377	9.16	2.21485	#NULL!	0.92	11.1
3	1	2	5	-0.309152	1	0	1	-88	-99	0	5	2	255	14365.5	8	65.6	7.5	0.42	-1.55	-0.59	0.64	0.494696	0.83	-0.18633	0	119	22.9	3.13114	10.06	2.30857	#NULL!	1.46	12.9
3	1	1	6	8.14391	1	0	1	-88	-99	1	8	2	255	14365.5	8	71.4	8.325	-0.17	0.89	0.26	0.35	0.300105	0.65	-0.430783	0	116	9.3	2.23001	6.22	1.82777	#NULL!	1.1	14.6
3	1	1	6	-1.78652	1	1	1	-88	-99	1	8	2	255	14365.5	8	68.35	7.95	0.18	-0.39	-0.11	25.1	3.26194	1.4	0.336472	2	91.84	19.822	2.98679	10.5705	2.35807	3	0.81	11.3
15	1	2	6	0.10975	1	1	1	-88	-99	1	9	2	255	14365.5	8	69.15	8.15	0.22	-0.06	0.09	0.23	0.207014	0.7	-0.356675	0	101	2	0.693147	14.81	2.6953	4	0.84	13.3
3	1	2	8	3.04158	1	0	1	-88	-99	0	6	1	256	14126.8	8	66.3	8.75	1.71	-2.19	0.01	2.36	1.21194	0.68	-0.385662	0	101	9.5	2.25129	15.41	2.73502	4	1.01	12.8
9	1	2	8	-2.33825	1	0	1	-88	-99	1	8	1	256	14126.8	8	64.55	7.7	0.87	-2.98	-1.15	0.02	0.0198026	0.63	-0.462035	0	99	10.5	2.35138	12.69	2.54081	4	1.33	11.5
3	1	2	9	-3.63931	1	0	1	-88	-99	1	10	1	256	14126.8	8	74.75	8.35	-1.53	1.61	-0.41	0.42	0.350657	0.38	-0.967584	0	105	2.7	0.993252	14.05	2.64262	4	1.17	11.8
0	1	2	8	-4.40392	1	1	1	-88	-99	1	9	1	256	14126.8	8	69.5	7.875	-0.67	-0.75	-0.95	0.06	0.0582689	0.73	-0.314711	0	113	16.3	2.79117	12.88	2.55568	#NULL!	1.05	12.8
3	1	2	6	2.13314	1	0	1	-88	-99	0	6	2	257	13890.1	8	62.15	5.1	-2.62	-3.03	-3.79	0.32	0.277632	0.39	-0.941609	0	130	38.2	3.64284	5.27	1.66203	#NULL!	1.17	12
9	1	1	11	10.1593	1	0	1	-88	-99	0	7	2	257	13890.1	8	69.5	7.875	-0.26	0.05	-0.21	0.36	0.307485	0.83	-0.18633	0	102	8.7	2.16332	13.96	2.6362	4	1.67	11.1
3	1	2	6	0.0611985	1	0	1	-88	-99	0	9	2	258	13655.3	8	67.85	6.975	-1.14	-0.66	-1.23	6.72	2.04381	1.64	0.494696	2	106.4	26.977	3.29498	5.4114	1.68851	1	0.79	12.8
3	1	2	8	-3.0252	1	0	1	-88	-99	1	6	1	258	13655.3	8	67.9	8.1	0.24	-1.51	-0.71	0.58	0.457425	0.54	-0.616186	0	107	116.8	4.76046	5.63	1.72811	1	1.17	12
3	1	2	6	-3.34296	1	0	1	-88	-99	1	9	1	258	13655.3	8	66.8	7.65	-0.06	-2.01	-1.23	0.07	0.0676586	0.58	-0.544727	0	126	41.1	3.71601	7.97	2.07568	#NULL!	1.24	14.5
0	1	2	5	-4.45058	1	1	1	-88	-99	1	9	1	258	13655.3	8	68.85	7.3	-1.38	-1.08	-1.66	2.61	1.28371	0.84	-0.174353	0	111	7.4	2.00148	13.23	2.58249	#NULL!	0.7	13.1
0	1	1	6	6.045	1	0	1	-88	-99	1	8	1	258	13655.3	8	70.4	7.55	-1.49	-0.39	-1.35	0.06	0.0582689	0.63	-0.462035	0	105	6.8	1.91692	13.8	2.62467	4	1.27	10.1
0	1	1	7	3.75178	1	1	1	-88	-99	0	9	1	259	13422.6	8	71.55	8.85	0.11	0.11	0.09	2.04	1.11186	1.36	0.307485	3	98.88	8.625	2.15466	13.536	2.60535	4	0.78	13.3
3	1	2	4	-2.47732	1	1	1	-88	-99	1	9	1	260	13191.9	8	68.55	8.5	0.59	-1.26	-0.29	0.12	0.113329	0.97	-0.0304592	0	100	9	2.19722	17.91	2.88536	4	1.14	12.1
3	1	2	7	1.05468	0	1	1	-88	-99	1	8	2	264	12289.1	8	64.25	6.125	-1.36	-2.27	-2.39	0.03	0.0295588	0.81	-0.210721	0	101	141.3	4.95089	7.27	1.98376	1	1.32	11.9
3	1	2	6	2.31302	1	0	1	-88	-99	0	7	1	266	11849.7	8	66.9	7.375	-0.56	-2.11	-1.65	3.34	1.46787	1.11	0.10436	3	105.06	20.4	3.01553	6.8544	1.92489	1	0.76	12.6
3	1	2	8	-1.9056	1	0	1	-88	-99	1	8	1	266	11849.7	8	70.8	8.15	-0.66	-0.37	-0.73	0.18	0.165514	0.43	-0.84397	0	106	22.5	3.11352	8.2	2.10413	1	1.12	12.5
3	1	2	7	-0.258368	0	0	1	-88	-99	1	10	1	266	11849.7	8	71.05	8.175	-0.71	-0.25	-0.71	2.1	1.1314	1.19	0.173953	3	96.82	8.775	2.17191	15.8976	2.76617	4	1.2	10
3	1	2	7	3.59755	1	0	1	-88	-99	1	10	2	268	11418.2	8	70.8	8.225	-0.14	0.38	0.05	3.81	1.5707	1.06	0.0582689	3	111.24	10.2	2.32239	9.9552	2.2981	#NULL!	0.89	13.1
0	1	2	5	-0.949977	1	0	1	-88	-99	1	8	2	269	11205.5	8	71.15	7.8	-0.83	0.51	-0.39	0.7	0.530628	0.46	-0.776529	0	102	18.3	2.9069	5.98	1.78842	1	1.02	11.8
3	2	2	6	-2.43459	0	0	1	-88	-99	1	9	1	269	11205.5	8	70.9	9.125	0.67	-0.38	0.27	0.1	0.0953102	0.88	-0.127833	0	114	3.7	1.30833	14.46	2.67139	#NULL!	1.68	12.8
3	1	2	5	-1.12365	1	0	1	-88	-99	1	10	1	270	10994.8	8	67.25	7.275	-0.86	-2.03	-1.81	1.21	0.792993	1.07	0.0676586	3	98.88	7.05	1.95303	9.0432	2.20201	4	0.82	11.4
3	1	1	9	-1.86885	1	0	1	-88	-99	1	10	1	270	10994.8	8	68.25	8.45	0.62	-1.58	-0.44	0.25	0.223144	0.65	-0.430783	0	103	3.3	1.19392	21.14	3.05117	4	1.31	13.4
0	2	1	9	-0.328607	1	0	1	-88	-99	1	7	1	271	10786.1	8	69.35	7.5	-1.22	-1.11	-1.53	1.83	1.04028	1.23	0.207014	3	109.18	102.075	4.62571	6.9696	1.94156	1	1.42	12.9
9	1	1	6	3.41897	1	0	1	-88	-99	1	9	1	271	10786.1	8	69.5	9.5	1.59	-1.04	0.63	0.28	0.24686	0.36	-1.02165	0	109	4.6	1.52606	11.94	2.47989	4	0.86	12.6
0	1	2	8	-0.38523	1	1	1	-88	-99	0	6	1	272	10579.4	8	67.15	6.275	-2.72	-2.11	-3.14	18.14	2.95178	1.22	0.198851	2	89.6	33.337	3.50667	7.5864	2.02636	1	0.88	12.6
3	1	2	6	1.90964	1	1	1	-88	-99	1	10	1	272	10579.4	8	71.7	8.55	-0.36	-0.08	-0.35	15.11	2.77944	1.18	0.165514	2	91.84	6.148	1.81613	12.5715	2.53143	4	0.6	11.5
9	2	2	3	-2.45051	1	0	1	-88	-99	0	7	2	273	10374.7	8	66.45	7.475	0.09	-1.51	-0.79	0.05	0.0487902	0.47	-0.755023	0	107	10.2	2.32239	7.08	1.95727	2	1.15	12
0	1	2	4	1.67258	1	0	1	-88	-99	0	6	1	273	10374.7	8	69.55	7.775	-0.84	-1.06	-1.23	1.12	0.751416	0.97	-0.0304592	0	95	8.7	2.16332	14.13	2.6483	4	1.04	11.9
6	1	2	9	-3.95091	0	0	1	-88	-99	1	10	2	273	10374.7	8	62.85	5.925	-1.18	-3	-2.76	0.98	0.683097	0.65	-0.430783	0	124	48.4	3.8795	6.24	1.83098	#NULL!	0.76	12.1
3	1	1	5	2.36249	0	0	1	-88	-99	1	8	2	273	10374.7	8	71.4	9.275	1.01	0.54	0.98	0.07	0.0676586	0.69	-0.371064	0	94	6.8	1.91692	15.59	2.74663	4	1.11	13.7
0	1	2	8	-4.49518	0	0	1	-88	-99	0	9	2	274	10172	9	65.35	6.875	-0.46	-1.99	-1.5	9.95	2.39334	1.73	0.548121	2	97.44	27.772	3.32403	6.5424	1.8783	1	1.16	13.4
0	2	2	6	0.639562	1	0	1	-88	-99	0	7	2	275	9971.24	9	71	6.6	-2.74	0.33	-1.84	0.26	0.231112	0.43	-0.84397	0	109	16.2	2.78501	8.63	2.15524	3	0.95	13.4
9	1	2	8	1.24707	1	1	0	-88	-99	1	7	2	275	9971.24	9	69.7	8.675	0.74	-0.2	0.42	0.55	0.438255	0.72	-0.328504	0	93	26.6	3.28091	6.57	1.88251	1	0.92	13.6
0	1	1	7	2.50973	1	0	1	-88	-99	1	10	1	275	9971.24	9	69.6	9.025	0.95	-1.08	0.11	1.45	0.896088	0.55	-0.597837	0	114	28.1	3.33577	8.51	2.14124	#NULL!	1.03	12.8
3	2	2	6	-1.53771	1	1	1	-88	-99	1	9	2	275	9971.24	9	68.9	7.925	-0.02	-0.53	-0.32	1.31	0.837248	0.83	-0.18633	0	111	39.5	3.6763	10.42	2.34373	#NULL!	0.99	11.5
0	1	2	6	-4.14699	1	0	1	-88	-99	0	7	1	276	9772.53	9	67.35	7.375	-0.73	-2.1	-1.74	5.05	1.80006	1.28	0.24686	2	91.84	39.962	3.68793	12.1104	2.49406	3	1.09	10.3
0	1	2	7	2.42138	1	0	1	-88	-99	1	9	1	276	9772.53	9	81.25	9.6	-1.31	4.09	0.68	20.21	3.05447	1.31	0.270027	2	131.04	22.949	3.13327	6.4641	1.86626	#NULL!	0.83	11.3
3	1	1	10	1.91097	1	1	1	-88	-99	0	3	1	277	9575.82	9	74.2	9.45	0.14	0.93	0.52	1.81	1.03318	1.31	0.270027	3	94.76	34.35	3.5366	8.2176	2.10628	1	1.09	12.9
3	1	2	5	-4.20783	0	0	1	-88	-99	1	8	1	277	9575.82	9	71	8.625	-0.04	-0.49	-0.32	0.68	0.518794	1.1	0.0953102	3	107.12	6.45	1.86408	12.0192	2.48651	4	0.72	12.6
3	1	2	6	5.72456	1	0	0	-88	-99	1	4	2	278	9381.11	9	57.85	4.2	-2.69	-5.15	-5.22	1.31	0.837248	0.68	-0.385662	0	111	81.9	4.4055	6.28	1.83737	#NULL!	1.11	15.9
0	1	2	9	-0.732879	1	0	1	-88	-99	1	10	2	278	9381.11	9	67.5	7.55	-0.13	-1.17	-0.74	1.58	0.947789	0.72	-0.328504	0	117	43.2	3.76584	9.51	2.25234	#NULL!	0.84	13.1
0	1	2	9	-2.54358	1	1	1	-88	-99	1	9	2	278	9381.11	9	64.45	6.375	-0.98	-2.43	-2.17	2.5	1.25276	1.05	0.0487902	3	90.64	9.9	2.29253	10.6656	2.36702	4	1.18	13.2
1	1	2	3	-1.47923	1	1	1	-88	-99	0	7	1	279	9188.39	9	65.1	6.9	-0.68	-3.15	-2.36	0.11	0.10436	0.52	-0.653926	0	94	7.7	2.04122	12.47	2.52333	4	0.81	12.7
3	1	2	5	-1.86342	1	0	1	-88	-99	0	6	1	279	9188.39	9	65.45	6.7	-1.19	-3	-2.62	0.17	0.157004	0.44	-0.820981	0	105	3.7	1.30833	14.49	2.67346	4	1.05	13.4
3	1	2	4	1.42556	0	1	1	-88	-99	1	7	1	279	9188.39	9	70	7.55	-1.36	-0.97	-1.55	1.8	1.02962	0.88	-0.127833	0	92	15.2	2.7213	11.15	2.41144	3	1.02	14.5
3	1	1	8	9.36613	1	0	1	-88	-99	1	9	2	279	9188.39	9	68.15	7.275	-0.75	-0.92	-1.07	0.36	0.307485	0.73	-0.314711	0	103	24.5	3.19867	12.24	2.50471	3	1.62	11.6
3	1	2	5	0.820914	1	88	1	-88	-99	1	7	1	279	9188.39	9	72.05	8.25	-0.9	-0.06	-0.74	0.49	0.398776	1.17	0.157004	3	93.73	3.975	1.38002	12.7104	2.54242	4	1.13	11.4
3	1	2	4	2.34351	0	0	1	-88	-99	1	10	2	279	9188.39	9	66.4	6.825	-0.91	-1.64	-1.6	1.3	0.832909	0.32	-1.13943	0	90	4.6	1.52606	15.58	2.74599	4	0.55	11.2
3	2	2	10	-2.38419	1	1	1	-88	-99	1	9	1	280	8997.68	9	67.05	6.7	-1.82	-2.3	-2.63	0	0	0.49	-0.71335	0	85	10.8	2.37955	7.53	2.0189	2	1.61	12.2
3	1	2	5	-4.40392	0	0	1	-88	-99	1	8	1	280	8997.68	9	69.8	7.275	-1.77	-1.08	-1.9	2.82	1.34025	1.2	0.182322	3	117.42	12.45	2.52172	9.8784	2.29035	#NULL!	1.07	12.8
6	1	2	7	0.506776	0	0	1	-88	-99	0	2	1	282	8622.26	9	68.15	9.575	2.11	-1.85	0.59	0.72	0.542324	0.54	-0.616186	0	115	5.9	1.77495	15.26	2.72524	#NULL!	0.93	13.6
3	2	2	4	-2.06294	0	0	1	-88	-99	1	9	2	282	8622.26	9	71.45	7.7	-1.06	0.39	-0.61	0.64	0.494696	0.93	-0.0725707	0	94	20.4	3.01553	7.27	1.98376	1	0.96	14
3	1	1	6	3.6711	0	0	1	-88	-99	1	9	1	282	8622.26	9	66.5	7.725	0.16	-2.58	-1.37	3.1	1.41099	0.91	-0.0943107	0	82	2.6	0.955511	17.72	2.87469	4	0.96	11.8
3	1	2	8	3.12844	1	0	1	-88	-99	0	7	1	283	8437.54	9	72.6	9.2	0.26	0.1	0.22	7.64	2.1564	1.42	0.350657	2	107.52	70.437	4.25472	6.8034	1.91742	1	0.77	14.3
0	1	2	6	-1.10149	1	0	1	-88	-99	0	6	1	283	8437.54	9	62.4	9.725	4.54	-4.42	0.73	1.55	0.936093	0.71	-0.34249	0	103	7	1.94591	16.13	2.78068	4	0.85	10.2
3	2	2	8	-3.76045	1	0	1	-88	-99	1	8	1	283	8437.54	9	69.9	7.475	-1.46	-1.09	-1.68	17.54	2.91993	1.11	0.10436	2	101.92	18.656	2.92617	10.5879	2.35971	3	0.84	12.5
12	1	2	7	-1.06641	1	0	1	-88	-99	0	6	2	284	8254.83	9	69.75	8.4	0.38	-0.35	0.09	0.55	0.438255	0.84	-0.174353	0	107	29.6	3.38777	10.1	2.31254	3	1.79	11.2
3	1	2	7	1.42899	1	0	1	-88	-99	1	7	1	284	8254.83	9	69.5	7.875	-0.67	-1.29	-1.22	1.71	0.996949	1.16	0.14842	3	97.85	60.375	4.10058	12.2976	2.5094	3	1	10.8
3	1	2	7	-4.20783	1	0	1	-88	-99	1	10	1	285	8074.12	9	70.3	9.65	1.52	-0.95	0.64	1.32	0.841567	0.68	-0.385662	0	87	5.3	1.66771	21.34	3.06058	4	1.17	13.3
3	1	2	9	-0.612434	0	0	1	-88	-99	1	10	2	286	7895.41	9	70.05	7.275	-1.32	-0.26	-1.13	1.88	1.05779	1.18	0.165514	3	107.12	32.775	3.48967	8.9184	2.18812	3	0.85	12.9
3	1	2	7	-2.20979	0	0	1	-88	-99	1	10	1	286	7895.41	9	69.95	7.875	-0.82	-1.13	-1.23	5.86	1.92571	1.43	0.357674	2	#NULL!	4.187	1.43198	12.18	2.4998	#NULL!	1.27	14.1
3	1	1	9	1.69985	1	0	1	-88	-99	1	8	1	289	7371.27	9	70.75	7.225	-2.18	-0.83	-2.04	0.31	0.270027	0.77	-0.261365	0	101	16.8	2.82138	8.48	2.13771	3	0.91	13.6
3	1	2	7	-3.53905	1	1	1	-88	-99	1	8	1	289	7371.27	9	71.5	9.75	1.27	-0.5	0.7	0.21	0.19062	0.61	-0.494296	0	85	3	1.09861	22.37	3.10772	4	1.13	12.1
0	1	1	8	6.48441	1	0	1	-88	-99	1	9	1	290	7200.56	9	71.7	8.625	-0.26	-0.43	-0.44	22.37	3.15145	1	0	1	113.85	7.084	1.95784	11.3609	2.43018	#NULL!	0.95	#NULL!
3	1	2	7	-2.48644	0	0	1	-88	-99	1	8	1	290	7200.56	9	80.15	10.975	0.55	3.3	1.79	2.46	1.24127	0.84	-0.174353	0	97	5.9	1.77495	12.76	2.54632	4	0.76	10.9
3	1	1	8	2.42953	0	0	1	-88	-99	0	8	1	291	7031.85	9	68.25	7.5	-0.83	-1.97	-1.71	0.23	0.207014	0.6	-0.510826	0	87	8.8	2.17475	13.53	2.60491	4	1.09	10.9
3	1	1	6	-3.36924	1	0	#NULL!	-88	-99	1	-99	1	291	7031.85	9	67.5	7.125	-1.21	-2.3	-2.18	0.33	0.285179	0.97	-0.0304592	0	100	7.7	2.04122	16	2.77259	4	0.91	10.4
9	1	2	4	-3.39242	1	1	1	-88	-99	0	6	1	292	6865.13	9	68.35	7.125	-1.52	-1.94	-2.19	0.93	0.65752	0.61	-0.494296	0	96	13.3	2.58776	6.86	1.92571	1	1.19	12.7
3	1	2	6	-2.25443	1	1	1	-88	-99	0	6	2	292	6865.13	9	66.55	7	-0.66	-1.8	-1.49	12.8	2.62467	1.6	0.470004	2	118.72	23.85	3.17178	10.2921	2.33138	#NULL!	0.89	13.6
15	1	2	5	0.466553	0	0	1	-88	-99	1	9	2	292	6865.13	9	72.8	8.55	-0.23	0.76	0.17	12.09	2.57185	0.86	-0.150823	1	100.98	39.578	3.67827	5.8916	1.77353	1	0.6	13.8
3	2	2	7	-3.75613	0	0	1	-88	-99	1	10	2	292	6865.13	9	64.5	5.9	-1.88	-2.63	-2.96	0.13	0.122218	0.57	-0.562119	0	101	16.8	2.82138	9.17	2.21594	3	1.36	12.2
9	1	1	9	9.96472	1	1	1	-88	-99	1	10	2	292	6865.13	9	70.95	8.64	0.37	0	0.25	0.43	0.357674	0.59	-0.527633	0	99	8.8	2.17475	12.19	2.50062	4	0.89	14.4
9	2	2	5	1.64678	0	0	1	-88	-99	0	6	2	293	6700.42	9	67.95	7.45	-0.41	-1.24	-0.98	1.68	0.985817	0.48	-0.733969	0	102	71.9	4.27528	7.72	2.04381	1	1.53	10.5
6	1	2	6	-1.06635	1	1	1	-88	-99	1	8	2	294	6537.71	9	68.35	8.825	1.3	-1.09	0.4	1.02	0.703098	0.71	-0.34249	0	111	8.4	2.12823	8.88	2.1838	#NULL!	0.99	14.4
3	1	2	7	-3.80556	1	0	1	-88	-99	0	6	1	296	6218.29	9	71.45	7.775	-1.47	-0.65	-1.44	15.03	2.77446	0.73	-0.314711	1	122.76	24.871	3.2137	6.798	1.91663	#NULL!	0.83	11.5
0	1	2	6	0.840232	1	0	1	-88	-99	1	7	2	296	6218.29	9	67.9	7.25	-0.7	-1.31	-1.23	1.18	0.779325	0.81	-0.210721	0	116	18.8	2.93386	11.46	2.43886	#NULL!	1.34	13.9
3	1	2	7	-4.59322	1	1	1	-88	-99	1	10	2	296	6218.29	9	72.05	8.625	0.05	0.38	0.2	0.16	0.14842	0.6	-0.510826	0	105	6.7	1.90211	13.47	2.60046	4	1.33	13.8
9	1	1	5	5.57704	1	0	1	-88	-99	1	8	1	296	6218.29	9	69.85	8.275	-0.17	-1.35	-0.87	0.48	0.392042	0.75	-0.287682	0	77	3.5	1.25276	16.66	2.81301	4	0.84	13.5
6	1	1	7	-0.596771	1	0	1	-88	-99	1	7	1	298	5906.86	9	77.1	9.325	-0.75	1.8	0.21	3.97	1.60342	0.87	-0.139262	0	117	20.2	3.00568	7.89	2.0656	#NULL!	0.74	15
3	1	1	7	6.59025	0	0	1	-88	-99	1	10	1	298	5906.86	9	69.45	7.525	-1.22	-1.56	-1.75	0.61	0.476234	0.64	-0.446287	0	94	7.1	1.96009	14.19	2.65254	4	0.96	12.5
0	1	2	9	0.560389	0	1	1	-88	-99	1	10	1	299	5754.15	9	69.6	7.675	-1.02	-1.52	-1.58	0.76	0.565314	0.79	-0.235722	0	104	12.5	2.52573	10.26	2.32825	3	1.16	11.2
0	1	1	7	-1.81564	1	0	1	-88	-99	1	8	1	299	5754.15	9	69.2	7.7	-0.84	-1.69	-1.54	3.58	1.5217	1.11	0.10436	3	95.79	3.75	1.32176	21.0528	3.04703	4	0.81	12.4
3	1	2	6	-3.1355	1	0	1	-88	-99	1	9	1	300	5603.44	9	71.1	8.475	-0.28	-0.88	-0.69	2.22	1.16938	1.46	0.378436	3	93.73	50.925	3.93035	13.1232	2.57438	3	1.53	12.5
3	1	2	7	3.52706	1	0	1	-88	-99	0	9	2	302	5308.01	9	73.4	8.575	-0.35	0.82	0.1	1.61	0.95935	0.59	-0.527633	0	103	22.4	3.10906	11.89	2.4757	3	0.93	12.4
3	1	2	6	3.39611	1	1	1	-88	-99	1	7	1	302	5308.01	9	71.75	7.875	-1.4	-0.63	-1.37	0.13	0.122218	0.79	-0.235722	0	83	9.4	2.24071	19.8	2.98568	4	1.2	11.5
3	1	2	7	-0.8516	0	0	1	-88	-99	1	8	2	303	5163.3	9	70.35	8.05	-0.25	-0.43	-0.42	0.87	0.625938	0.7	-0.356675	0	106	26.8	3.2884	6.88	1.92862	1	0.96	13.6
9	1	1	12	5.40855	1	0	1	-88	-99	1	9	1	304	5020.59	9	70.55	9	0.62	-1.19	-0.16	0.26	0.231112	0.71	-0.34249	0	105	7.9	2.06686	9	2.19722	4	1.5	13.7
0	1	2	10	-3.33158	1	0	1	-88	-99	0	7	2	305	4879.88	10	68.05	7.65	-0.15	-1.4	-0.86	0.4	0.336472	0.63	-0.462035	0	103	12.9	2.55723	7.58	2.02551	1	0.95	12.8
0	2	2	5	-1.70174	1	1	1	-88	-99	0	6	1	305	4879.88	10	68.7	8.525	0.57	-2.02	-0.67	4.68	1.73695	0.91	-0.0943107	0	92	6.4	1.8563	12.74	2.54475	4	0.86	11.7
3	1	2	6	2.04277	1	1	1	-88	-99	1	10	1	305	4879.88	10	73.5	9.175	-0.03	0.08	0	0.78	0.576613	0.89	-0.116534	0	90	38.6	3.65325	8.43	2.1318	3	1.02	14.4
9	1	2	4	2.0147	1	0	1	-88	-99	0	8	1	307	4604.45	10	76.5	10.75	1.09	1.36	1.45	0.08	0.076961	0.61	-0.494296	0	96	3.9	1.36098	18.91	2.93969	4	1.08	7.8
3	1	2	7	-0.673271	1	1	1	-88	-99	1	7	1	307	4604.45	10	72.3	9.375	0.57	-0.48	0.18	3.59	1.52388	1.5	0.405465	3	108.15	30.975	3.43318	9.6864	2.27072	3	0.96	10.6
0	2	1	7	-1.11257	1	1	1	-88	-99	1	8	1	307	4604.45	10	72.95	8.75	-0.45	-0.19	-0.45	0.29	0.254642	0.95	-0.0512933	0	109	173.1	5.15387	13.91	2.63261	3	1.71	14.7
12	1	2	8	-0.612002	1	0	1	-88	-99	1	10	2	307	4604.45	10	70.5	7.7	-0.79	-0.44	-0.82	0.87	0.625938	0.78	-0.248461	0	101	22	3.09104	25.54	3.24025	3	1.47	13.4
3	2	2	4	-2.35559	0	0	1	-88	-99	1	7	2	309	4337.03	10	69	7.25	-1.04	-1.08	-1.34	10.68	2.45788	1.44	0.364643	2	109.76	9.487	2.24992	5.0808	1.62547	2	0.89	12
6	1	2	9	3.56526	1	0	1	-88	-99	1	8	1	310	4206.31	10	69.1	7.5	-1.13	-1.93	-1.87	0.66	0.506818	0.94	-0.0618754	0	109	16.6	2.8094	9.03	2.20055	3	0.97	13.2
9	2	2	6	-4.82846	0	0	1	-88	-99	1	8	2	310	4206.31	10	70.4	7.55	-0.99	-0.53	-1	1.11	0.746688	0.81	-0.210721	0	112	7.3	1.98787	12.61	2.53449	#NULL!	1.26	12.1
9	1	1	12	6.27695	1	0	1	-88	-99	0	4	1	311	4077.6	10	72.4	9.575	0.79	-0.51	0.34	0.95	0.667829	0.65	-0.430783	0	125	32	3.46574	5.5	1.70475	#NULL!	1.01	14.4
3	1	2	4	-4.20783	1	0	1	-88	-99	0	3	2	311	4077.6	10	68.6	7.325	-0.81	-1.28	-1.27	24.54	3.24025	1.36	0.307485	2	110.88	28.196	3.33918	6.3075	1.84174	#NULL!	0.79	12.3
0	1	2	6	0.148496	1	0	1	-88	-99	0	5	1	311	4077.6	10	69.4	7.65	-0.99	-1.81	-1.7	0.22	0.198851	0.48	-0.733969	0	107	3	1.09861	17.16	2.84258	4	1.03	13.1
9	1	1	11	6.27695	1	0	1	-88	-99	1	8	2	311	4077.6	10	69.5	8.35	0.39	-0.91	-0.18	1.49	0.912283	0.69	-0.371064	0	86	4.8	1.56862	17.54	2.86448	4	0.82	14.4
0	2	2	3	-2.45182	1	0	1	-88	-99	0	7	1	312	3950.89	10	70.5	7.525	-1.57	-1.35	-1.86	1.37	0.86289	0.84	-0.174353	0	94	11.2	2.41591	13.31	2.58852	4	0.99	11.7
3	1	2	7	4.25602	1	1	1	-88	-99	1	8	2	312	3950.89	10	73	8.3	-0.61	0.48	-0.23	0.17	0.157004	0.47	-0.755023	0	90	3.1	1.1314	14.64	2.68376	4	1.09	13.8
3	1	2	6	-2.28543	1	0	1	-88	-99	1	8	2	312	3950.89	10	65.1	6.325	-1.31	-2.7	-2.53	0.25	0.223144	0.66	-0.415515	0	93	28.6	3.35341	12.24	2.50471	3	0.99	14.2
9	1	2	6	7.00316	1	1	1	-88	-99	1	9	1	312	3950.89	10	74.1	8.9	-0.56	0.22	-0.33	21.05	3.09331	1.49	0.398776	2	106.4	22.366	3.10754	13.2501	2.58401	3	0.5	10.6
0	1	2	10	0.397264	1	1	1	-88	-99	1	10	1	313	3826.18	10	75.05	8.3	-1.68	0.61	-0.98	1.16	0.770108	0.51	-0.673345	0	99	4.6	1.52606	17.41	2.85704	4	0.73	13.3
3	1	2	5	-0.732879	1	0	1	-88	-99	1	9	1	313	3826.18	10	68.65	8.15	0.05	-2.17	-1.14	0.28	0.24686	0.55	-0.597837	0	87	4.5	1.50408	21.79	3.08145	4	1.28	13.1
0	1	2	6	-2.82751	1	1	1	-88	-99	0	6	1	314	3703.47	10	71	8.375	-0.4	-1.17	-0.91	0.02	0.0198026	0.65	-0.430783	0	91	2.2	0.788457	14.89	2.70069	4	0.82	12.5
3	1	2	8	-4.41071	1	0	1	-88	-99	1	10	1	314	3703.47	10	65.65	7.375	-0.08	-3.49	-2.06	0.66	0.506818	0.81	-0.210721	0	120	11.5	2.44235	8.84	2.17929	#NULL!	1.39	12.5
3	1	2	8	-3.19371	1	1	1	-88	-99	1	10	2	314	3703.47	10	67.6	6.025	-2.77	-1.73	-2.97	2.45	1.23837	0.78	-0.248461	0	109	25.9	3.25424	8.88	2.1838	3	0.93	12.4
3	1	1	8	3.90255	1	1	1	-88	-99	0	7	2	315	3582.75	10	71.25	8.025	-0.54	-0.28	-0.54	0.11	0.10436	0.53	-0.634878	0	115	11.6	2.45101	9.24	2.22354	#NULL!	1.32	12.6
3	1	2	6	5.98214	1	0	1	-88	-99	0	7	2	315	3582.75	10	70	7.475	-1	-0.78	-1.13	0.94	0.662688	0.57	-0.562119	0	109	13.9	2.63189	9.25	2.22462	3	1.03	13.6
3	1	2	7	-0.741628	1	1	1	-88	-99	0	6	2	316	3464.04	10	68.35	7.35	-0.69	-1.46	-1.28	0.18	0.165514	0.45	-0.798508	0	102	4.8	1.56862	12.38	2.51608	4	0.91	12.6
0	1	2	8	-1.20631	1	1	1	-88	-99	0	5	1	316	3464.04	10	75.05	9.55	0.05	0.56	0.28	3.39	1.47933	1.14	0.131028	3	114.33	31.575	3.45237	13.2	2.58022	#NULL!	1.1	12.9
1	1	2	8	0.768079	1	0	1	-88	-99	1	9	2	316	3464.04	10	69	7.5	-0.66	-1.2	-1.11	2.86	1.35067	1.15	0.139762	3	104.03	37.35	3.62033	11.8176	2.46959	3	1.01	12.4
0	1	2	7	0.410283	1	0	#NULL!	-88	-99	1	-99	2	316	3464.04	10	69.5	7.175	-1.32	-1	-1.48	1.41	0.879627	1.36	0.307485	3	117.42	13.8	2.62467	12.5568	2.53026	#NULL!	1.54	15.2
3	1	2	8	0.339389	1	0	1	-88	-99	0	9	1	317	3347.33	10	68.9	8.25	0.11	-2.13	-1.06	0.16	0.14842	0.61	-0.494296	0	114	6.5	1.8718	13.85	2.62829	#NULL!	0.83	13.7
3	1	2	5	-4.43656	1	0	1	-88	-99	1	8	1	317	3347.33	10	68.3	7.2	-1.36	-2.39	-2.3	0.44	0.364643	0.76	-0.274437	0	106	25.7	3.24649	16.43	2.79911	3	1.45	12.6
9	1	1	8	2.7229	1	0	1	-88	-99	1	8	1	318	3232.62	10	73.65	9.575	0.44	-0.09	0.29	0.84	0.609766	0.5	-0.693147	0	112	2.1	0.741937	12.88	2.55568	#NULL!	0.76	13.1
0	2	1	7	2.89106	0	0	1	-88	-99	1	10	1	319	3119.9	10	70.1	8.725	0.39	-1.64	-0.58	4.01	1.61144	1.01	0.00995033	3	103	5.7	1.74047	13.824	2.62641	4	1.03	13.2
0	1	2	8	0.0321358	88	88	1	-88	-99	1	9	1	320	3009.19	10	70.9	7.65	-1.49	-1.31	-1.77	0.52	0.41871	0.56	-0.579818	0	66	3.5	1.25276	23.18	3.14329	4	0.96	12.1
6	1	2	7	-4.02316	1	0	1	-88	-99	1	10	2	321	2900.48	10	67.5	6.525	-1.79	-1.88	-2.33	0.33	0.285179	1.14	0.131028	3	109.18	65.325	4.17937	7.536	2.01969	1	1.4	14.2
9	1	2	6	0.693427	1	0	1	-88	-99	0	3	1	322	2793.77	10	72.9	9.425	0.46	-0.48	0.11	25.27	3.26843	1.53	0.425268	2	86.24	9.805	2.28289	16.0602	2.77634	4	0.81	11.8
0	1	2	8	-0.638412	1	0	1	-88	-99	1	9	2	323	2689.06	10	66.5	7.275	-0.22	-2.31	-1.42	0.2	0.182322	0.67	-0.400478	0	99	5.7	1.74047	14.24	2.65605	4	1.19	13.6
0	1	2	4	-3.45758	1	0	1	-88	-99	1	8	2	323	2689.06	10	69.1	7.325	-0.96	-1.27	-1.36	1.98	1.09192	0.81	-0.210721	0	97	5.2	1.64866	14.91	2.70203	4	0.66	11
0	1	2	7	-3.00457	1	1	1	-88	-99	1	10	1	324	2586.34	10	70.5	6.95	-2.59	-1.56	-2.67	5.83	1.92132	1.73	0.548121	2	125.44	27.931	3.32974	7.0383	1.95137	#NULL!	0.74	11.5
6	1	2	6	1.93034	0	1	1	-88	-99	1	8	1	324	2586.34	10	69.15	7.6	-0.98	-2.14	-1.86	2.05	1.11514	1.03	0.0295588	3	91.67	14.325	2.66201	14.4576	2.67122	3	1.16	11.3
3	1	1	10	7.57407	1	1	1	-88	-99	1	9	1	325	2485.63	10	73.4	9.4	0.3	-0.32	0.06	1.89	1.06126	0.66	-0.415515	0	106	8.4	2.12823	9.73	2.27521	4	0.88	11.5
1	1	2	6	1.2534	1	0	1	-88	-99	1	10	2	325	2485.63	10	71.2	6.65	-2.71	-0.46	-2.19	0.77	0.57098	0.85	-0.162519	0	111	8.8	2.17475	12.34	2.51285	#NULL!	1.09	10.5
3	2	2	5	1.98726	1	0	1	-88	-99	1	8	2	327	2290.21	10	67.3	6.3	-2.13	-2.05	-2.68	0.28	0.24686	0.54	-0.616186	0	139	14.1	2.64617	6.87	1.92716	#NULL!	1.36	13.7
6	1	2	7	3.5871	1	1	1	-88	-99	1	9	1	328	2195.49	10	73.9	8.9	-0.5	-0.16	-0.46	0.9	0.641854	0.58	-0.544727	0	117	8.5	2.14007	13.04	2.56802	#NULL!	1.08	12.8
0	2	2	5	-1.4975	1	1	1	-88	-99	1	8	2	329	2102.78	10	70	6.775	-2.14	-1.01	-2.07	0.52	0.41871	1.18	0.165514	3	101.97	27.6	3.31782	6.2784	1.83712	1	0.75	8.3
3	1	2	10	-2.40158	1	0	1	-88	-99	1	7	1	329	2102.78	10	70.1	7.975	-0.71	-1.81	-1.47	0.34	0.29267	0.47	-0.755023	0	91	5.3	1.66771	20.51	3.02091	4	1.12	14.1
3	1	2	8	-4.46476	1	1	1	-88	-99	0	7	1	330	2012.07	10	69.45	7.125	-1.91	-2.11	-2.5	4.63	1.72811	1.07	0.0676586	3	92.7	5.625	1.72722	14.5152	2.6752	4	0.96	12.3
3	1	2	6	-0.481506	1	0	1	-88	-99	0	6	2	331	1923.36	10	59.7	5.475	-0.64	-5.13	-3.83	3.53	1.51072	0.86	-0.150823	0	68	3.7	1.30833	30	3.4012	4	0.62	12.6
9	1	2	7	0.0501423	1	0	1	-88	-99	1	8	2	331	1923.36	10	72.7	8.925	0.27	0.03	0.21	2.58	1.27536	0.59	-0.527633	0	107	16.5	2.80336	6.11	1.80993	1	1.02	11.4
9	1	1	4	5.63066	1	0	1	-88	-99	1	8	2	331	1923.36	10	70.4	8	-0.33	-0.88	-0.68	0.34	0.29267	0.66	-0.415515	0	99	7	1.94591	13.65	2.61374	4	1.76	12.5
0	2	2	4	-1.42988	1	0	0	-88	-99	1	7	1	332	1836.65	10	82.05	9.725	-1.35	3.28	0.32	0.79	0.582216	0.47	-0.755023	0	128	9.4	2.24071	10.32	2.33408	#NULL!	1.41	9.1
3	1	2	5	-4.46476	88	0	1	-88	-99	1	8	1	332	1836.65	10	71.65	7.8	-1.48	-1.19	-1.69	11.77	2.5471	0.88	-0.127833	1	100.98	4.158	1.42503	12.3703	2.5153	4	0.81	11.7
3	1	2	6	-3.06576	1	0	1	-88	-99	1	6	1	332	1836.65	10	67.5	7.275	-0.95	-2.98	-2.32	0.61	0.476234	0.79	-0.235722	0	85	7.1	1.96009	15.89	2.76569	4	1.14	11.8
0	1	2	9	-1.63072	1	1	1	-88	-99	1	7	2	333	1751.93	10	70.15	7.3	-1.3	-1.01	-1.46	2.75	1.32176	1.5	0.405465	3	90.64	52.35	3.95795	8.0256	2.08264	1	0.93	11.8
3	2	2	4	-0.0617105	1	1	1	-88	-99	1	9	1	333	1751.93	10	71.9	9.95	1.39	-1.1	0.52	1.1	0.741937	1.08	0.076961	3	106.09	19.425	2.96656	9.1776	2.21677	3	0.85	12.7
3	1	2	6	-3.26953	1	1	1	-88	-99	1	9	1	333	1751.93	10	75.4	9.9	0.39	0.4	0.48	4.32	1.67147	0.95	-0.0512933	0	107	9.7	2.27213	14.08	2.64476	4	0.83	12.2
3	1	2	4	-2.07886	1	1	1	-88	-99	1	8	1	333	1751.93	10	70.45	9.125	0.81	-1.73	-0.27	1.41	0.879627	0.95	-0.0512933	0	75	16.1	2.77882	30	3.4012	3	1.23	11.2
3	1	2	4	-0.875976	1	0	1	-88	-99	1	8	1	335	1588.51	11	74.1	8.6	-0.98	-0.19	-0.83	0.24	0.215111	0.63	-0.462035	0	117	13.7	2.6174	6.58	1.88403	#NULL!	1.39	12.1
3	1	1	8	-2.18661	1	1	1	-88	-99	1	9	1	335	1588.51	11	74.35	7.9	-2.12	-0.08	-1.6	0.03	0.0295588	0.61	-0.494296	0	118	135.7	4.91045	8	2.07944	#NULL!	0.95	13.1
6	1	1	4	1.27395	1	0	1	-88	-99	1	9	1	336	1509.8	11	71.1	7.95	-1.07	-1.5	-1.55	1.39	0.871293	0.72	-0.328504	0	110	33.9	3.52342	11.1	2.40695	#NULL!	1.1	13.7
3	1	2	6	-0.688758	1	1	1	-88	-99	1	7	1	336	1509.8	11	73.55	8.875	-0.45	-0.44	-0.55	0.08	0.076961	0.58	-0.544727	0	114	7	1.94591	13.41	2.596	#NULL!	1.01	13.2
0	1	2	5	-4.72168	1	0	1	-88	-99	0	6	2	337	1433.08	11	68.3	6.7	-1.74	-1.81	-2.22	0.41	0.34359	0.45	-0.798508	0	109	13.9	2.63189	9.69	2.27109	3	1.23	12.9
3	1	2	6	-4.71911	1	1	0	-88	-99	0	5	2	337	1433.08	11	76.45	8.575	-1.07	1.42	-0.16	4.28	1.66393	1.19	0.173953	3	113.3	14.25	2.65676	9.8784	2.29035	#NULL!	0.95	11.8
3	2	2	7	-2.95977	1	1	1	-88	-99	1	9	1	337	1433.08	11	75	10.65	1.35	0.16	1.12	0.21	0.19062	0.66	-0.415515	0	119	19.6	2.97553	8.21	2.10535	#NULL!	0.76	11.7
3	1	2	8	-0.999828	0	0	1	-88	-99	1	10	1	337	1433.08	11	76.45	11.625	2	0.78	1.93	0.4	0.336472	0.96	-0.040822	0	115	12.2	2.50144	11.45	2.43799	#NULL!	1.55	13.5
3	2	2	6	-1.26082	1	0	1	-88	-99	0	7	1	338	1358.37	11	72.4	9.25	0.39	-0.97	-0.18	0.22	0.198851	0.88	-0.127833	0	94	5.7	1.74047	17.17	2.84316	4	1.49	12.9
3	1	1	7	0.753292	1	0	1	-88	-99	0	8	2	339	1285.66	11	67.2	5.925	-2.84	-2.27	-3.28	0.75	0.559616	0.87	-0.139262	0	112	22.3	3.10459	12.16	2.49815	#NULL!	1.11	11.4
3	1	1	6	-3.3084	1	0	1	-88	-99	1	8	1	339	1285.66	11	69.45	7.325	-1.56	-2.25	-2.32	4.89	1.77326	0.83	-0.18633	0	107	17.5	2.8622	11.31	2.42569	3	0.69	12.8
9	1	2	5	-0.581431	1	1	1	-88	-99	1	10	2	339	1285.66	11	72.5	8.775	0.13	-0.18	0.02	3.05	1.39872	0.89	-0.116534	0	100	16.3	2.79117	13.92	2.63333	3	0.91	14.5
3	2	2	6	-2.54612	0	0	1	-88	-99	1	9	2	339	1285.66	11	69.1	7.925	-0.08	-1.52	-0.82	2.89	1.35841	1.07	0.0676586	3	86.52	2.775	1.02065	28.8	3.36038	4	0.92	11.7
12	1	2	5	-2.89215	1	0	1	-88	-99	1	8	2	340	1214.95	11	68.65	7.375	-0.75	-1.71	-1.43	0.02	0.0198026	0.56	-0.579818	0	124	34.1	3.5293	7.28	1.98513	#NULL!	1.49	13
6	1	2	9	3.44374	1	0	1	-88	-99	1	9	1	340	1214.95	11	73.65	9.825	0.75	-0.47	0.35	0.65	0.500775	0.69	-0.371064	0	109	7.2	1.97408	9.23	2.22246	4	1.08	15.3
3	1	1	5	3.26574	1	1	1	-88	-99	1	9	1	340	1214.95	11	70.2	8.2	-0.39	-1.95	-1.3	1.18	0.779325	1.15	0.139762	3	95.79	23.475	3.15594	10.5696	2.35798	3	0.97	14.4
3	1	2	3	-4.49518	1	0	1	-88	-99	1	8	1	340	1214.95	11	72.55	8	-1.44	-0.94	-1.52	9.82	2.3814	1.23	0.207014	2	115.36	11.395	2.43317	11.049	2.40234	#NULL!	0.66	11.7
12	1	2	7	3.53258	1	0	1	-88	-99	1	8	1	340	1214.95	11	73.95	9.175	-0.15	-0.34	-0.28	0.29	0.254642	0.6	-0.510826	0	92	4.4	1.4816	14.05	2.64262	4	1.1	12.3
3	1	2	8	1.02995	1	0	1	-88	-99	1	8	2	340	1214.95	11	70.45	7.175	-1.6	-1	-1.67	4.93	1.78002	1.07	0.0676586	3	98.88	6.825	1.92059	14.2848	2.6592	4	0.74	12.9
3	1	2	6	-3.35653	0	0	1	-88	-99	0	3	1	341	1146.24	11	69.3	8.8	0.76	-2.35	-0.66	1.61	0.95935	0.98	-0.0202027	0	109	18.4	2.91235	13.57	2.60786	3	0.87	13
0	1	2	8	2.45048	1	88	0	-88	-99	1	7	2	341	1146.24	11	73.95	8.975	0.02	0.36	0.19	1.43	0.887891	0.61	-0.494296	0	115	35.4	3.56671	6.34	1.84688	#NULL!	0.91	#NULL!
6	1	2	7	-3.55666	1	0	1	-88	-99	0	8	2	342	1079.52	11	70.1	7.8	-0.53	-1.17	-0.97	1.58	0.947789	0.71	-0.34249	0	112	24.4	3.19458	5.26	1.66013	#NULL!	1.27	13.3
6	1	2	5	2.83183	1	88	1	-88	-99	1	9	1	342	1079.52	11	76	10.9	1.37	0.5	1.3	1.61	0.95935	0.86	-0.150823	0	99	8.7	2.16332	13.47	2.60046	4	0.77	11.2
3	1	2	5	-1.59182	1	0	1	-88	-99	0	6	1	343	1014.81	11	66.45	6.75	-1.49	-3.59	-3.07	13.85	2.698	1.32	0.277632	2	101.92	27.56	3.31637	22.7244	3.12344	3	1.03	10
0	1	2	4	2.74016	0	0	0	-88	-99	1	6	2	343	1014.81	11	69.95	7.775	-0.54	-1.25	-1.01	0.28	0.24686	0.71	-0.34249	0	96	25.2	3.22684	9.73	2.27521	3	1.15	#NULL!
9	1	2	8	-2.32366	0	1	1	-88	-99	1	10	1	344	952.099	11	74.25	8.675	-0.92	-0.28	-0.82	0.19	0.173953	0.48	-0.733969	0	108	7.5	2.0149	6.94	1.9373	2	0.99	12.9
0	1	2	4	-2.27675	1	0	1	-88	-99	1	8	1	344	952.099	11	75.45	9.4	-0.25	0.23	-0.08	0.29	0.254642	0.7	-0.356675	0	91	2.1	0.741937	13.32	2.58927	4	1	9
3	1	2	9	1.03169	1	0	1	-88	-99	1	9	2	345	891.387	11	69.45	7.15	-1.34	-1.47	-1.73	0.46	0.378436	0.59	-0.527633	0	101	22	3.09104	5.86	1.76815	1	1.15	12.7
0	2	2	8	1.10025	1	0	1	-88	-99	1	10	1	345	891.387	11	74.2	7.875	-2.13	-0.32	-1.71	0.16	0.14842	0.4	-0.916291	0	102	12.7	2.5416	6.94	1.9373	1	0.98	12
3	1	2	9	1.96204	1	0	1	-88	-99	1	9	2	346	832.675	11	69.05	7.35	-0.9	-1.65	-1.5	0.59	0.463734	0.54	-0.616186	0	102	5.7	1.74047	14.51	2.67484	4	0.94	12.9
3	1	2	7	-2.25443	1	1	1	-88	-99	1	10	1	346	832.675	11	72.95	8.175	-1.3	-0.87	-1.37	0.95	0.667829	0.6	-0.510826	0	84	4.8	1.56862	22.44	3.11085	4	0.88	11.5
9	1	1	9	5.06037	1	0	0	-88	-99	1	7	1	347	775.963	11	70.15	7.975	-0.73	-2.08	-1.61	0.07	0.0676586	0.46	-0.776529	0	135	43.4	3.77046	5.55	1.7138	#NULL!	1.91	13
0	1	1	9	-2.44017	1	1	1	-88	-99	1	8	1	347	775.963	11	72.85	9.2	0.19	-0.93	-0.3	0.27	0.239017	0.38	-0.967584	0	109	12.6	2.5337	8.09	2.09063	1	0.88	10.7
3	1	2	7	0.346176	1	1	1	-88	-99	0	7	1	348	721.251	11	73.45	8.15	-1.47	-0.69	-1.41	0.68	0.518794	1.1	0.0953102	3	79.31	1.05	0.0487902	28.1184	3.33642	4	0.9	11.5
3	1	1	8	2.04694	1	0	1	-88	-99	1	10	2	348	721.251	11	68.4	7.55	-0.4	-1.93	-1.29	0.23	0.207014	0.51	-0.673345	0	112	18.4	2.91235	10.84	2.38324	#NULL!	1.12	13.9
3	2	2	9	0.217073	1	0	1	-88	-99	1	8	1	348	721.251	11	73.4	8.45	-1	-0.71	-1.08	2.98	1.38128	0.85	-0.162519	0	96	11.9	2.47654	13.52	2.60417	4	1.04	11.2
3	1	1	7	4.81594	1	0	1	-88	-99	1	10	2	348	721.251	11	70.9	7.85	-0.69	-0.95	-0.96	1.46	0.900161	0.81	-0.210721	0	113	42.2	3.74242	10.44	2.34564	#NULL!	1.07	11.1
12	1	2	10	-0.343059	1	0	1	-88	-99	1	9	2	350	617.826	11	73.75	8.9	-0.02	0.14	0.06	6.99	2.07819	0.87	-0.139262	1	112.86	28.105	3.33595	7.9928	2.07854	#NULL!	0.9	12.3
6	1	2	7	-3.22129	0	0	1	-88	-99	0	9	2	351	569.114	11	72.25	7.425	-1.7	-0.47	-1.46	0.23	0.207014	0.8	-0.223144	0	116	19.3	2.96011	8.31	2.11746	#NULL!	1.1	11.1
3	1	1	7	1.01601	0	0	0	-88	-99	1	8	1	351	569.114	11	79.05	10.025	-0.3	1.64	0.45	0.14	0.131028	0.54	-0.616186	0	119	15.7	2.75366	17.73	2.87526	#NULL!	1.1	11.3
3	1	2	8	0.236951	1	0	1	-88	-99	0	7	1	352	522.402	11	72.9	9.325	0.33	-0.99	-0.22	0.03	0.0295588	0.49	-0.71335	0	121	20.8	3.03495	8.56	2.1471	#NULL!	0.81	#NULL!
3	1	2	9	0.261085	1	0	1	-88	-99	1	9	2	352	522.402	11	70.8	8.1	-0.31	-1.05	-0.73	1.61	0.95935	1.09	0.0861777	3	107.12	29.175	3.37331	9.072	2.20519	3	0.97	11.9
3	1	2	7	-4.43656	1	0	1	-88	-99	0	7	2	353	477.689	11	69.15	6.5	-2.36	-1.71	-2.6	0.1	0.0953102	0.5	-0.693147	0	127	11.3	2.4248	8.52	2.14242	#NULL!	0.92	11
3	1	2	4	-4.40392	1	0	1	-88	-99	0	7	2	353	477.689	11	66.35	6.875	-0.81	-2.81	-2.12	17.79	2.93332	1.27	0.239017	2	89.6	14.098	2.64603	16.6518	2.81252	3	0.78	13
0	1	2	8	-4.41071	1	1	1	-88	-99	1	9	1	353	477.689	11	69.2	8.4	0.23	-2.57	-1.17	6.7	2.04122	0.94	-0.0618754	1	97.02	11.55	2.44669	15.9959	2.77233	4	0.85	12.3
3	1	2	8	-3.59547	1	1	1	-88	-99	1	8	2	353	477.689	11	66.75	5.825	-2.88	-2.65	-3.51	0.05	0.0487902	0.72	-0.328504	0	71	1.4	0.336472	30	3.4012	4	1.18	12
3	1	2	9	-0.734109	1	1	1	-88	-99	1	8	1	355	394.265	11	73.35	9.25	0.12	-0.85	-0.31	10.24	2.41948	0.92	-0.0833816	1	84.15	12.243	2.50495	16.686	2.81457	3	0.84	14.2
0	1	2	7	-4.40392	0	0	1	-88	-99	1	9	1	355	394.265	11	71.85	9.1	0.35	-1.48	-0.46	0.37	0.314811	0.74	-0.301105	0	74	2.4	0.875469	23.33	3.14974	4	1.49	12
9	1	2	6	5.75401	1	1	1	-88	-99	0	5	1	356	355.553	11	77.6	9.25	-0.96	0.94	-0.32	0.14	0.131028	0.35	-1.04982	0	111	6	1.79176	7.69	2.03992	#NULL!	0.92	15.3
3	1	2	7	3.22317	1	1	1	-88	-99	1	8	2	356	355.553	11	71.45	7.725	-1.03	-0.86	-1.16	0.43	0.357674	0.59	-0.527633	0	117	4.4	1.4816	7.59	2.02683	#NULL!	1.23	11
3	1	2	7	-0.394167	1	0	1	-88	-99	1	8	2	359	251.416	11	72.65	7.2	-2.17	-0.43	-1.77	0.55	0.438255	0.58	-0.544727	0	118	23.2	3.14415	6.31	1.84214	#NULL!	0.91	12.8
9	1	2	4	-3.57926	1	0	1	-88	-99	0	7	2	361	191.992	11	71.3	7.55	-1.24	-0.99	-1.38	0.15	0.139762	0.7	-0.356675	0	106	11.9	2.47654	8.82	2.17702	4	1.43	11.2
0	1	2	10	-3.26828	1	0	1	-88	-99	1	9	2	364	117.855	11	73.65	8.3	-0.77	-0.12	-0.61	0.12	0.113329	0.69	-0.371064	0	115	9.7	2.27213	11.92	2.47822	#NULL!	1.3	12.6
3	1	1	8	5.20373	1	0	1	-88	-99	1	9	2	364	117.855	11	72.2	7.45	-1.64	-0.69	-1.51	0.13	0.122218	0.48	-0.733969	0	82	3.5	1.25276	12.86	2.55412	4	0.99	11
6	1	2	7	-1.69472	1	0	1	-88	-99	1	10	1	364	117.855	11	76.85	9.45	-0.52	0.48	-0.18	1.1	0.741937	0.71	-0.34249	0	96	4.3	1.45862	16.36	2.79484	4	0.93	13.2
3	1	2	8	4.98104	1	0	1	-88	1	1	8	2	367	61.7184	12	67.35	6.475	-1.83	-2.61	-2.74	0.4	0.336472	0.58	-0.544727	0	117	10.7	2.37024	8.4	2.12823	#NULL!	1.06	12.7
9	1	2	6	1.01005	1	0	1	-88	1	1	7	1	367	61.7184	12	76.75	9.425	-0.54	0.39	-0.23	0.9	0.641854	0.77	-0.261365	0	85	7	1.94591	13.46	2.59972	4	1.24	12.6
0	2	2	7	-1.0814	1	1	1	-88	1	0	5	1	368	47.0062	12	73.1	8.275	-1.19	-1.16	-1.42	0.09	0.0861777	0.58	-0.544727	0	74	48.2	3.87536	9.21	2.22029	3	1.01	10.2
3	1	2	7	0.847681	0	0	1	-88	1	1	7	1	368	47.0062	12	69.45	6.925	-2.28	-2.69	-3.03	0.13	0.122218	0.53	-0.634878	0	124	12	2.48491	8.02	2.08194	#NULL!	1.45	13
0	1	1	6	0.781491	1	0	1	-88	1	1	6	1	368	47.0062	12	73.9	9.6	0.41	-0.82	-0.07	0.38	0.322083	0.59	-0.527633	0	95	5.1	1.62924	8.07	2.08815	2	1.12	14.5
3	2	2	7	-1.23927	1	1	1	-88	1	1	6	1	368	47.0062	12	74.75	8.875	-0.78	-0.46	-0.79	5.98	1.94305	0.87	-0.139262	1	80.19	4.851	1.57918	23.7621	3.16809	4	0.9	12.2
3	1	2	7	-3.14907	1	1	1	-88	1	0	6	1	369	34.294	12	70	7.65	-1.19	-2.47	-2.13	1.35	0.854415	0.92	-0.0833816	0	88	19	2.94444	20.49	3.01994	3	1.69	10.2
3	2	2	7	-3.64583	1	0	1	-88	1	1	5	1	370	23.5818	12	70.55	9.875	1.7	-2.26	0.17	0.02	0.0198026	0.31	-1.17118	0	113	7.2	1.97408	11.01	2.3988	#NULL!	1.05	11.6
0	1	2	6	-0.677167	1	1	1	-88	1	0	4	2	371	14.8696	12	71.1	7.775	-0.86	-1.22	-1.21	0.53	0.425268	0.62	-0.478036	0	117	15.5	2.74084	14.78	2.69327	#NULL!	0.91	13
9	1	2	9	-2.33825	1	0	1	-88	1	1	7	2	371	14.8696	12	71.05	6.55	-2.85	-1.24	-2.67	0.28	0.24686	0.7	-0.356675	0	118	1.9	0.641854	14.24	2.65605	#NULL!	1.07	11.9
3	1	2	7	-2.20979	0	1	1	-88	1	1	7	2	372	8.15735	12	73.75	8.125	-1.05	-0.21	-0.85	0.41	0.34359	0.65	-0.430783	0	121	19.8	2.98568	8.74	2.16791	#NULL!	1.17	14.7
6	1	2	6	-0.24624	1	0	1	-88	1	1	7	1	372	8.15735	12	73.5	9.125	-0.1	-1.05	-0.56	5.67	1.89762	1.16	0.14842	2	96.32	3.869	1.353	12.7629	2.54654	4	0.84	10.8
0	1	2	5	-3.53905	88	0	1	-88	1	0	5	1	373	3.44514	12	74.8	8.05	-2.01	-0.52	-1.7	2.89	1.35841	1.09	0.0861777	3	93.73	13.65	2.61374	14.7168	2.68899	3	0.79	11.5
3	1	1	8	2.84323	1	0	1	-88	1	1	6	2	373	3.44514	12	76.9	9.925	0.48	0.99	0.78	11.83	2.55179	1.4	0.336472	2	137.76	6.148	1.81613	7.7517	2.04791	#NULL!	0.77	13.4
0	1	2	6	-4.22141	1	1	1	-88	1	1	6	2	373	3.44514	12	71.45	7.825	-0.88	-1.11	-1.17	3.07	1.40364	1.04	0.0392207	3	94.76	13.8	2.62467	10.8384	2.3831	3	1.12	12.1
3	1	2	4	-1.49177	1	0	1	-88	1	1	7	1	373	3.44514	12	74.55	9.55	0.18	-0.63	-0.15	0.93	0.65752	1.14	0.131028	3	106.09	4.05	1.39872	13.6992	2.61734	4	1.12	12.9
6	1	1	7	4.72599	1	1	0	-88	0	1	7	1	374	0.73292	12	72.1	7.575	-2.01	-1.67	-2.26	0.35	0.300105	0.68	-0.385662	0	115	18	2.89037	5.79	1.75613	#NULL!	1.34	13.6
0	2	2	8	-4.17393	1	0	1	-88	1	1	4	1	374	0.73292	12	72.8	8.625	-0.59	-1.38	-1.09	0.59	0.463734	0.75	-0.287682	0	95	19.9	2.99072	13.78	2.62322	3	1.01	11.2
3	1	2	4	-0.536793	1	1	1	-88	1	1	5	1	374	0.73292	12	71.6	7.95	-1.23	-1.88	-1.82	1.68	0.985817	0.79	-0.235722	0	89	4	1.38629	13.96	2.6362	4	1.18	12.5
0	2	2	6	-4.65952	1	1	0	-88	0	0	2	1	375	0.020705	12	74.6	9.95	0.65	-0.64	0.21	0.6	0.470004	0.64	-0.446287	0	109	26.1	3.26194	8.83	2.17816	3	1.28	11.8
3	1	2	10	2.11017	1	1	1	-88	1	1	7	2	375	0.020705	12	69.2	7.275	-1.07	-2.01	-1.8	0.15	0.139762	0.5	-0.693147	0	121	24.4	3.19458	6.04	1.7984	#NULL!	1.08	13.3
6	1	2	7	-1.84931	1	0	1	-88	1	1	7	2	375	0.020705	12	70.85	7.875	-0.64	-1.37	-1.13	0.66	0.506818	0.27	-1.30933	0	75	5.9	1.77495	15.84	2.76254	4	0.8	14.4
3	1	2	4	0.95805	1	1	1	-88	1	1	6	2	377	4.59627	12	71.5	7.4	-1.53	-1.15	-1.66	0.55	0.438255	0.84	-0.174353	0	102	39	3.66356	6.33	1.8453	1	1.05	11.9
3	1	1	10	-1.5411	1	0	1	-88	1	1	6	2	377	4.59627	12	73.35	8.4	-0.56	-0.44	-0.6	0.17	0.157004	0.35	-1.04982	0	111	6.4	1.8563	8.89	2.18493	#NULL!	0.9	14.4
0	1	2	5	-1.27233	1	0	1	-88	1	1	6	1	377	4.59627	12	74	9.35	0.07	-0.92	-0.37	0.22	0.198851	0.57	-0.562119	0	75	3	1.09861	16.81	2.82197	4	1.22	9.5
1	1	2	7	-3.15366	1	0	1	-88	1	1	5	1	378	9.88406	12	73.7	8.275	-1.36	-1.06	-1.49	0.03	0.0295588	0.43	-0.84397	0	84	4.1	1.41099	20.09	3.00022	4	0.85	13.9
0	1	2	6	-3.31954	1	1	1	-88	1	0	5	2	379	17.1718	12	66.65	6.625	-1.33	-3.04	-2.63	4.66	1.73342	1.1	0.0953102	3	108.15	30.375	3.41362	8.3424	2.12135	3	1.17	11.3
0	1	2	9	-1.48657	1	0	1	-88	1	1	7	1	379	17.1718	12	70.5	7.8	-1.11	-2.41	-2.03	3.44	1.49065	1.66	0.506818	3	105.06	39.3	3.67122	13.9968	2.63883	3	0.88	12.8
0	1	2	8	1.54946	1	1	1	-88	1	1	7	1	379	17.1718	12	69.75	7.4	-1.52	-2.72	-2.5	0.77	0.57098	0.9	-0.105361	0	83	4.1	1.41099	16.72	2.81661	4	1.17	13.3
9	1	2	7	2.23753	1	0	1	-88	1	1	7	1	379	17.1718	12	73.2	7.3	-2.81	-1.29	-2.62	2.23	1.17248	0.78	-0.248461	0	86	5.1	1.62924	20.72	3.0311	4	0.85	12.1
3	1	1	11	6.22291	1	1	1	-88	1	1	7	2	379	17.1718	12	71.35	9.025	0.73	-1.24	-0.03	2.93	1.36864	0.78	-0.248461	0	91	3.2	1.16315	21.05	3.0469	4	0.93	13.8
3	1	2	10	-2.96305	1	1	1	-88	1	1	9	1	380	26.4596	12	71.55	8.025	-1.1	-1.99	-1.78	0.21	0.19062	0.47	-0.755023	0	113	10.7	2.37024	7.41	2.00283	#NULL!	1.02	12.7
0	1	2	8	0.924394	1	0	1	-88	1	1	6	2	380	26.4596	12	73.4	8.475	-0.48	-0.46	-0.55	5.36	1.85003	1.05	0.0487902	2	108.64	4.611	1.52844	11.136	2.41018	4	1.01	13
3	1	2	7	-0.647248	1	0	1	-88	1	1	5	2	380	26.4596	12	76.25	9.2	-0.22	0.63	0.13	0.39	0.329304	0.9	-0.105361	0	110	8.8	2.17475	12.8	2.54945	#NULL!	1.36	13.9
3	1	2	10	1.32898	1	1	1	-88	1	1	7	2	381	37.7474	12	71.95	6.525	-3.16	-1.03	-2.78	2.24	1.17557	0.91	-0.0943107	0	124	24.5	3.19867	7.28	1.98513	#NULL!	1.03	10
6	1	1	8	0.705192	1	1	1	-88	1	1	6	2	381	37.7474	12	75.45	8.525	-0.91	0.31	-0.51	0.01	0.00995033	0.5	-0.693147	0	119	19.4	2.96527	8.88	2.1838	#NULL!	1.3	12.8
3	1	2	4	-4.20783	1	0	1	-88	1	1	6	1	381	37.7474	12	78.35	8.875	-1.66	0.83	-0.88	1.16	0.770108	1.24	0.215111	3	111.24	16.2	2.78501	12.384	2.51641	#NULL!	0.98	11.7
9	1	2	8	2.0373	1	1	1	-88	1	1	7	2	381	37.7474	12	73.95	9.45	0.6	-0.27	0.34	0.2	0.182322	0.79	-0.235722	0	92	4	1.38629	12.95	2.5611	4	1.35	10.7
9	1	2	7	0.942428	0	0	1	-88	1	1	6	2	381	37.7474	12	71.2	7.925	-0.67	-1.32	-1.11	2.55	1.26695	0.47	-0.755023	0	77	10.4	2.34181	16.88	2.82613	4	0.8	11.6
3	1	2	4	-2.14895	1	0	1	-88	1	1	6	2	381	37.7474	12	72.55	9.3	0.76	-0.8	0.21	0.27	0.239017	0.53	-0.634878	0	105	19.3	2.96011	11.01	2.3988	3	1.5	11.3
0	1	2	7	-1.23396	1	0	1	-88	1	0	2	2	382	51.0352	12	70.5	7.725	-0.76	-1.61	-1.34	0.23	0.207014	0.6	-0.510826	0	129	34.5	3.54096	7.85	2.06051	#NULL!	1.26	12.9
9	1	2	9	5.76763	1	1	1	-88	1	1	7	2	382	51.0352	12	69.65	8.025	-0.1	-1.93	-1.02	2.26	1.18173	0.96	-0.040822	0	89	21.8	3.08191	9.44	2.24496	3	1.2	11.8
0	2	2	4	-2.38083	1	0	1	-88	1	1	5	1	382	51.0352	12	71.3	7.5	-1.87	-2.12	-2.4	0.13	0.122218	0.52	-0.653926	0	105	23.7	3.16548	9.62	2.26384	3	0.92	11.8
3	1	2	8	-0.388436	1	0	1	-88	1	1	5	1	382	51.0352	12	71.95	7.325	-2.39	-1.85	-2.62	0.43	0.357674	0.58	-0.544727	0	108	7.4	2.00148	14.19	2.65254	4	0.95	12
0	1	2	3	-4.69599	1	0	1	-88	1	0	3	1	383	66.323	12	70.6	7.9	-0.99	-2.43	-1.94	27.27	3.3418	1.31	0.270027	2	84	4.505	1.50519	25.6302	3.24377	4	0.53	11.3
3	1	2	7	2.30898	1	1	1	-88	1	1	6	2	383	66.323	12	72.3	8.4	-0.3	-0.93	-0.64	15.56	2.80699	0.93	-0.0725707	1	101.97	26.411	3.27378	7.2409	1.97975	1	0.72	14.2
12	1	2	6	-1.5235	1	1	1	-88	1	1	7	2	383	66.323	12	71.5	8.075	-0.54	-1.24	-0.97	0.04	0.0392207	0.38	-0.967584	0	95	3.3	1.19392	18.17	2.89977	4	1.01	14.4
9	1	2	5	2.74057	0	0	1	-88	1	1	6	2	385	102.899	12	73.5	8.8	-0.08	-0.5	-0.27	1.08	0.732368	0.78	-0.248461	0	110	63	4.14313	6.42	1.85942	#NULL!	1.12	12.1
6	1	2	7	5.41313	1	0	1	-88	1	1	7	2	385	102.899	12	68.3	6.6	-1.91	-2.49	-2.7	1.41	0.879627	0.7	-0.356675	0	98	83.2	4.42125	6.73	1.90658	1	1.16	12.3
6	1	2	7	3.32701	1	0	1	-88	1	1	8	2	386	124.186	12	71.8	7.75	-1.08	-1.16	-1.33	21.68	3.12148	1.38	0.322083	2	133.28	20.723	3.03124	7.8039	2.05462	#NULL!	0.71	13.1
3	1	2	7	-3.16045	0	0	0	-88	0	1	4	1	386	124.186	12	66.6	7.475	-0.28	-4.13	-2.46	0.17	0.157004	0.85	-0.162519	0	99	6.5	1.8718	15.01	2.70872	4	1.46	#NULL!
3	1	2	9	1.14642	0	0	1	-88	1	1	6	2	387	147.474	12	71.45	7.4	-1.51	-1.31	-1.73	1	0.693147	0.6	-0.510826	0	103	6.8	1.91692	7.04	1.95161	2	1.31	9.9
12	1	2	8	-0.708086	1	0	0	-88	0	1	7	2	389	200.05	12	70.8	7.25	-1.57	-1.59	-1.92	3.53	1.51072	0.82	-0.198451	0	109	40.4	3.69883	6.01	1.79342	1	1.2	13.5
0	1	1	8	1.91129	1	1	1	-88	1	1	7	1	389	200.05	12	75.55	9.85	0.29	-0.46	0.02	4.55	1.7138	0.64	-0.446287	0	98	5.7	1.74047	16.53	2.80518	4	1.16	13.8
0	2	2	5	-1.65672	0	0	1	-88	1	1	5	1	390	229.337	12	75.4	8.6	-1.33	-0.54	-1.22	1.53	0.928219	0.84	-0.174353	0	108	7.9	2.06686	15.77	2.75811	4	1.02	14.5
3	1	2	7	0.783534	1	0	1	-88	1	0	3	2	391	260.625	12	72.55	9.05	0.46	-0.95	-0.08	0.22	0.198851	1.03	0.0295588	3	121.54	27.975	3.33131	8.976	2.19455	#NULL!	2.07	11.2
9	1	2	9	-1.54666	1	0	1	-88	1	1	7	1	391	260.625	12	72	7.85	-1.51	-1.96	-2.05	0.44	0.364643	0.58	-0.544727	0	108	8.1	2.09186	8.26	2.11142	2	0.93	12.4
0	1	2	6	-3.21423	1	0	1	-88	1	1	5	2	392	293.913	12	69.8	6.75	-2.11	-2.01	-2.55	1.84	1.0438	0.61	-0.494296	0	117	18.7	2.92852	6.73	1.90658	#NULL!	1.16	10.9
9	1	2	8	4.40191	1	1	1	-88	1	1	7	2	392	293.913	12	76.35	9.3	-0.12	0.49	0.14	1.37	0.86289	0.73	-0.314711	0	108	9.3	2.23001	13.78	2.62322	4	0.92	14.3
0	1	2	5	0.486913	1	1	1	-88	1	1	7	2	395	405.776	12	75	9.175	0.03	-0.07	0	0.75	0.559616	0.72	-0.328504	0	86	4.5	1.50408	18.16	2.89922	4	0.76	12.8
3	1	1	5	2.31966	0	1	1	-88	1	0	4	1	397	490.352	13	72.6	7.8	-1.78	-1.8	-2.15	1.22	0.797507	0.95	-0.0512933	0	104	15.8	2.76001	9.08	2.20607	3	0.95	13.5
3	1	1	6	-3.36924	1	1	1	-88	1	1	6	2	399	582.928	13	70.3	7.7	-0.74	-1.91	-1.47	0.2	0.182322	1.1	0.0953102	3	125.66	9.375	2.23805	8.352	2.1225	#NULL!	0.93	11.6
3	1	2	7	-4.20783	1	1	1	-88	1	1	7	1	399	582.928	13	76.15	8.7	-1.38	-0.37	-1.17	0.33	0.285179	0.64	-0.446287	0	101	4.9	1.58924	13.28	2.58626	4	0.97	12.8
0	2	2	2	-5.02455	0	0	1	-88	1	0	2	2	401	683.503	13	74.4	8.4	-0.82	-0.39	-0.76	20.67	3.07593	1.51	0.41211	2	134.4	29.892	3.39759	6.7773	1.91358	#NULL!	0.92	13.3
3	1	2	8	-3.41059	1	1	1	-88	1	1	7	2	401	683.503	13	76.55	9.275	-0.2	0.43	0.05	1.34	0.850151	0.86	-0.150823	0	107	15.4	2.73437	12.84	2.55257	3	1.27	13
3	2	2	4	-2.03602	88	88	1	-88	1	0	3	2	402	736.791	13	69.5	7.6	-0.65	-2.26	-1.6	0.42	0.350657	0.55	-0.597837	0	115	4.8	1.56862	8.87	2.18267	#NULL!	1.1	12
3	1	2	5	-2.81449	1	0	1	-88	1	1	6	2	402	736.791	13	68.9	7.35	-0.86	-2.48	-1.89	0.3	0.262364	0.61	-0.494296	0	128	134	4.89784	6.49	1.87026	#NULL!	1.27	11.2
3	1	1	8	2.37536	1	0	1	-88	1	1	7	1	402	736.791	13	75.1	10.1	0.7	-0.84	0.16	38.65	3.68009	1.45	0.371564	2	135.52	41.234	3.71926	6.7077	1.90326	#NULL!	0.83	13.4
3	1	2	4	1.37814	1	0	1	-88	1	1	6	1	403	792.079	13	71	8.05	-0.88	-2.54	-1.9	2.37	1.21491	0.75	-0.287682	0	115	21.7	3.07731	6	1.79176	#NULL!	1.2	14.3
3	1	2	5	1.43343	1	0	0	-88	1	1	5	1	403	792.079	13	71.55	6.6	-3.57	-2.31	-3.63	0.09	0.0861777	0.83	-0.18633	0	121	19.4	2.96527	8.04	2.08443	#NULL!	1.48	#NULL!
3	1	2	7	1.11432	0	0	1	-88	1	1	6	1	403	792.079	13	77.05	9.525	-0.48	-0.06	-0.38	0.2	0.182322	0.49	-0.71335	0	74	3.4	1.22378	26.15	3.26385	4	0.92	13.3
0	1	2	7	-0.362141	1	0	1	-88	1	0	6	1	404	849.366	13	76.65	7.425	-3.51	-0.24	-2.64	0.02	0.0198026	0.44	-0.820981	0	114	17.9	2.8848	7.69	2.03992	#NULL!	1.37	12.8
3	1	2	4	-1.1377	1	88	1	-88	1	0	4	2	404	849.366	13	69.5	7.65	-0.58	-2.28	-1.56	1.55	0.936093	0.69	-0.371064	0	94	3.2	1.16315	15.01	2.70872	4	0.91	12.9
9	1	1	9	4.15132	1	1	1	-88	1	1	6	2	404	849.366	13	71.95	6.6	-3.02	-1.36	-2.83	2.56	1.26976	0.97	-0.0304592	0	109	25.7	3.24649	6.16	1.81808	1	1.13	12.1
0	1	2	7	-3.22129	1	0	1	-88	1	1	6	1	404	849.366	13	74.65	8.825	-0.82	-1.06	-1.08	7.04	2.08443	1.35	0.300105	2	112	7.632	2.03235	15.2859	2.72693	#NULL!	0.68	#NULL!
3	1	2	9	-1.62715	1	0	1	-88	1	1	7	1	404	849.366	13	73.45	8.525	-0.92	-1.55	-1.4	0.14	0.131028	0.49	-0.71335	0	82	2.4	0.875469	15.61	2.74791	4	0.97	12.9
3	1	2	3	1.25306	1	0	1	-88	1	0	6	1	405	908.654	13	73.15	8.675	-0.62	-1.69	-1.25	23.22	3.18718	1.08	0.076961	2	113.12	7.367	1.99701	12.5802	2.53212	#NULL!	0.62	12.5
6	1	2	7	-4.42961	1	1	1	-88	1	0	4	2	405	908.654	13	73.85	8.75	-0.23	-0.65	-0.44	0.47	0.385262	0.72	-0.328504	0	101	3.5	1.25276	16.4	2.79728	4	1.02	11.9
3	1	2	10	-3.1355	1	0	1	-88	1	1	4	2	405	908.654	13	75.15	8.025	-1.54	-0.16	-1.17	1.58	0.947789	1.22	0.198851	3	105.06	107.7	4.67935	5.1648	1.64187	1	1.12	12.7
0	1	2	7	3.33376	0	1	0	-88	1	1	6	1	405	908.654	13	76.6	8.825	-1.32	-0.27	-1.09	3.26	1.44927	1.14	0.131028	3	80.34	4.725	1.55287	28.8	3.36038	4	1.37	#NULL!
0	1	2	7	-0.808088	1	1	1	-88	1	1	7	2	406	969.942	13	72.9	7.325	-2.04	-1.03	-1.95	0	0	0.54	-0.616186	0	116	15.2	2.7213	7.79	2.05284	#NULL!	1.18	10.1
3	1	1	10	6.81395	0	0	1	-88	1	1	7	1	406	969.942	13	#NULL!	9.25	#NULL!	#NULL!	-0.66	0.23	0.207014	0.78	-0.248461	0	115	6.1	1.80829	11.15	2.41144	#NULL!	1.19	12.1
3	1	2	8	-0.859016	1	1	1	-88	1	1	6	1	407	1033.23	13	68.25	6.825	-2.04	-3.72	-3.39	1.26	0.815365	0.85	-0.162519	0	97	5.5	1.70475	16.88	2.82613	4	1.03	14
3	1	2	6	-4.28224	1	1	1	-88	1	1	6	1	408	1098.52	13	72.6	8.375	-0.89	-1.95	-1.58	0.7	0.530628	0.6	-0.510826	0	88	11.8	2.4681	5.68	1.73695	2	0.83	12
3	1	2	9	-1.6858	0	0	1	-88	1	1	7	2	409	1165.81	13	77	8.175	-1.75	0.48	-1.04	0.41	0.34359	0.37	-0.994252	0	115	20.4	3.01553	6.03	1.79675	#NULL!	0.93	11.8
0	1	2	5	-1.01701	1	0	1	-88	1	1	8	2	409	1165.81	13	74	8.9	-0.07	-0.65	-0.33	0.96	0.672944	1.15	0.139762	3	117.42	146.025	4.98378	8.6304	2.15529	#NULL!	1.31	13.1
3	1	2	8	-1.37498	1	1	1	-88	1	1	7	1	410	1235.09	13	75.55	9.475	-0.18	-0.78	-0.48	0.34	0.29267	0.51	-0.673345	0	116	6.9	1.93152	9.32	2.23216	#NULL!	1.15	12.8
3	1	2	5	-4.46476	1	0	1	-88	1	1	5	1	410	1235.09	13	72.3	7.8	-1.69	-2.1	-2.23	3.98	1.60543	1.82	0.598837	3	97.85	14.7	2.68785	16.2144	2.7859	3	1.37	12.2
3	1	2	5	-1.05939	1	1	1	-88	1	1	4	1	411	1306.38	13	69.2	7.175	-1.74	-3.38	-3	0.17	0.157004	0.43	-0.84397	0	119	10.5	2.35138	8.14	2.09679	#NULL!	1.45	14.5
3	1	2	9	-3.41901	1	1	1	-88	1	1	7	1	411	1306.38	13	74.5	7.2	-3.35	-1.22	-2.96	1.64	0.970779	0.79	-0.235722	0	111	12.2	2.50144	8.22	2.10657	#NULL!	1.07	12.1
6	1	2	9	0.684914	1	1	1	-88	1	1	6	2	411	1306.38	13	71.55	7.775	-0.98	-1.6	-1.47	2.83	1.34286	1.08	0.076961	3	104.03	13.05	2.56879	9.12	2.21047	3	0.89	11.2
3	1	2	10	-0.141154	1	0	1	-88	1	1	6	2	411	1306.38	13	75.3	8.425	-1.01	-0.19	-0.8	1.03	0.708036	0.69	-0.371064	0	101	10.9	2.38876	12.28	2.50797	4	0.99	13
3	1	2	6	3.06549	0	0	1	-88	1	1	6	1	411	1306.38	13	73.5	7.975	-1.77	-1.63	-2.05	0.45	0.371564	0.97	-0.0304592	0	81	5.3	1.66771	25.95	3.25617	4	1	13
3	1	2	7	-4.40392	1	0	1	-88	1	1	7	2	412	1379.67	13	71.1	9.35	1.18	-1.78	0.06	0.05	0.0487902	0.61	-0.494296	0	99	7.1	1.96009	13.82	2.62612	4	0.97	13.2
3	1	2	6	-3.70937	1	0	1	-88	1	0	3	1	413	1454.96	13	74.5	9.375	-0.04	-1.25	-0.59	1.99	1.09527	1.2	0.182322	3	101.97	4.8	1.56862	17.8752	2.88341	4	1	11.4
0	1	2	8	2.2752	1	0	0	-88	0	1	6	2	413	1454.96	13	77.5	10.45	0.92	0.61	0.94	1.79	1.02604	1.12	0.113329	3	105.06	12.525	2.52773	7.6992	2.04112	1	0.62	#NULL!
0	1	1	2	-3.37603	0	0	1	-88	1	1	5	1	413	1454.96	13	74.9	9.575	0.11	-1.09	-0.4	0.11	0.10436	0.42	-0.867501	0	81	3.2	1.16315	16.58	2.8082	4	0.83	11.3
3	1	2	6	2.15729	1	0	1	-88	1	1	5	2	415	1611.53	13	77.45	11.425	1.87	0.56	1.63	9.37	2.33892	0.87	-0.139262	1	90.09	7.161	1.96865	12.5145	2.52689	4	1.02	11.9
3	1	2	5	-0.672041	1	0	1	-88	1	1	6	2	416	1692.82	13	72.65	7.65	-1.46	-1.26	-1.64	1.7	0.993252	0.96	-0.040822	0	109	12.7	2.5416	8.42	2.13061	3	0.95	13.2
9	1	2	8	0.707241	1	1	1	-88	1	1	7	2	416	1692.82	13	71.55	7.9	-0.79	-1.67	-1.37	0.67	0.512824	0.64	-0.446287	0	93	14.5	2.67415	9.12	2.21047	3	1.1	11.1
3	2	2	7	-3.40918	1	1	1	-88	1	1	6	1	417	1776.11	13	72.05	8.25	-0.9	-2.3	-1.77	0.38	0.322083	0.96	-0.040822	0	104	29.2	3.37417	8.66	2.15871	3	1	#NULL!
3	1	2	5	-3.41606	0	0	1	-88	1	1	6	2	417	1776.11	13	70.9	7.45	-1.28	-1.93	-1.87	0.19	0.173953	0.64	-0.446287	0	111	7.5	2.0149	8.74	2.16791	#NULL!	0.84	12.1
15	1	1	7	4.93631	1	1	1	-88	1	1	7	1	417	1776.11	13	75.2	8.4	-1.57	-1.02	-1.61	0.41	0.34359	0.45	-0.798508	0	114	7.2	1.97408	8.86	2.18155	#NULL!	0.93	12.4
0	1	2	6	-1.77035	0	0	1	-88	1	1	6	2	418	1861.4	13	72.15	9.025	0.53	-1.47	-0.28	1.03	0.708036	0.77	-0.261365	0	114	33.2	3.50255	7.19	1.97269	#NULL!	0.88	12.7
3	1	2	8	3.1653	1	1	1	-88	1	1	5	2	418	1861.4	13	75.5	8.575	-0.85	-0.22	-0.7	0.74	0.553885	0.58	-0.544727	0	99	23.4	3.15274	10.69	2.36931	3	1.17	12.7
3	1	1	6	2.45491	1	0	1	-88	1	0	6	2	419	1948.68	13	76	8.3	-1.34	-0.04	-0.97	1.49	0.912283	0.88	-0.127833	0	91	18.6	2.92316	10.79	2.37862	3	0.9	12.8
9	1	2	9	3.03231	1	1	1	-88	1	1	6	1	419	1948.68	13	75.55	9.2	-0.53	-0.91	-0.8	0.13	0.122218	0.5	-0.693147	0	81	3.1	1.1314	29.84	3.39585	4	0.97	12.4
3	1	2	10	3.04189	1	1	1	-88	1	1	4	2	422	2222.55	13	70.1	6.625	-2.44	-2.29	-2.93	0.3	0.262364	0.44	-0.820981	0	110	33.1	3.49953	6.6	1.88707	#NULL!	1.35	13.4
3	1	2	8	0.176113	0	0	1	-88	1	0	1	1	423	2317.83	13	76.15	9.275	-0.59	-0.72	-0.76	0.81	0.593327	0.75	-0.287682	0	95	6.3	1.84055	13.99	2.63834	4	0.86	12.1
0	1	2	3	1.97986	0	0	1	-88	1	1	6	1	423	2317.83	13	75.85	8.075	-2.25	-0.84	-2.01	5.68	1.89912	1.2	0.182322	2	109.76	3.604	1.28204	8.2041	2.10463	2	0.8	14.5
0	2	2	5	-4.95692	1	1	1	-88	1	0	3	1	424	2415.12	13	75.45	7.65	-2.84	-1.02	-2.5	5.64	1.89311	1.24	0.215111	2	89.6	5.883	1.77207	16.3125	2.79193	4	1.08	13.5
3	1	2	8	-3.43706	1	0	1	-88	1	1	6	2	425	2514.41	13	73.95	8.625	-0.42	-0.89	-0.69	0.19	0.173953	0.42	-0.867501	0	99	15	2.70805	9.44	2.24496	3	1.28	13.8
3	2	2	4	-3.94177	0	0	1	-88	1	1	5	2	425	2514.41	13	70.8	7.45	-1.25	-2.06	-1.92	0.9	0.641854	0.58	-0.544727	0	103	10.2	2.32239	10.87	2.38601	4	1.09	15.1
0	1	2	7	-3.29405	1	1	0	-88	0	1	5	2	426	2615.7	14	72.55	8.15	-0.7	-1.43	-1.17	10.46	2.43886	1.9	0.641854	2	122.08	42.559	3.75089	6.8295	1.92125	#NULL!	1.1	14.6
9	1	2	7	-2.32781	1	0	1	-88	1	1	7	1	426	2615.7	14	73.55	8.275	-1.32	-1.81	-1.81	0.37	0.314811	0.51	-0.673345	0	126	11.4	2.43361	9.28	2.22786	#NULL!	1.37	11.3
0	1	2	6	-4.34308	1	1	1	-88	1	1	6	1	427	2718.99	14	78.05	9.575	-0.64	-0.01	-0.49	4.11	1.6312	1.04	0.0392207	3	116.39	50.1	3.91402	5.0208	1.61359	#NULL!	1.46	12.7
3	1	2	5	-3.38317	1	0	1	-88	1	0	3	1	429	2931.56	14	74.45	8.375	-1.42	-1.49	-1.72	1.57	0.943906	0.75	-0.287682	0	93	232.9	5.45061	24.83	3.21205	3	0.4	14.5
12	1	2	8	3.31626	1	0	1	-88	1	1	7	2	429	2931.56	14	72	8.1	-0.63	-1.67	-1.24	0.39	0.329304	0.48	-0.733969	0	111	23.6	3.16125	8.37	2.12465	#NULL!	0.99	13.4
3	1	2	5	1.74206	1	0	1	-88	1	1	6	2	429	2931.56	14	74.35	8.85	-0.22	-0.8	-0.5	11.03	2.4874	1.67	0.512824	2	114.24	14.416	2.66834	14.877	2.69982	#NULL!	1.01	13.1
3	1	2	4	-2.0095	1	1	1	-88	1	0	5	2	431	3152.14	14	78.65	9.175	-0.78	0.77	-0.22	0.61	0.476234	0.81	-0.210721	0	116	15.4	2.73437	7.46	2.00956	#NULL!	0.96	13.9
3	2	2	6	0.662046	1	0	1	-88	1	1	6	2	432	3265.42	14	72.05	7.5	-1.52	-1.69	-1.91	3.08	1.4061	0.97	-0.0304592	0	113	26.2	3.26576	8.22	2.10657	#NULL!	0.78	13.1
3	1	1	9	5.75548	1	88	1	-88	1	1	6	2	432	3265.42	14	78.1	10	0.31	0.56	0.48	0.14	0.131028	0.66	-0.415515	0	79	5.2	1.64866	24.59	3.20234	4	1.37	13.2
3	1	1	5	4.07657	1	1	1	-88	1	1	6	1	432	3265.42	14	72.5	9.35	0.49	-2.32	-0.73	0.37	0.314811	0.87	-0.139262	0	90	7.5	2.0149	26.12	3.2627	4	1.09	13.6
3	1	1	7	0.199295	1	1	1	-88	1	1	4	1	434	3498	14	69.6	7.1	-2	-3.51	-3.21	2.4	1.22378	0.73	-0.314711	0	85	7.2	1.97408	18.72	2.92959	4	1.29	12.9
3	1	1	6	3.89092	1	1	1	-88	1	1	7	2	436	3738.58	14	71.6	8	-0.66	-1.91	-1.39	40.25	3.71965	1.42	0.350657	2	129.92	20.829	3.03635	7.3341	1.99253	#NULL!	0.57	12.5
3	1	2	6	0.503152	1	1	1	-88	1	1	7	2	438	3987.15	14	76.5	9.65	0.26	-0.12	0.15	0.19	0.173953	0.54	-0.616186	0	84	5.1	1.62924	18.86	2.93704	4	1.26	12.4
0	1	2	6	-0.257883	1	1	1	-88	1	1	5	1	438	3987.15	14	75.3	8.5	-1.45	-1.27	-1.63	0.91	0.647103	0.68	-0.385662	0	100	3.6	1.28093	19.26	2.95803	4	0.76	14.1
12	1	2	6	-0.42834	1	1	1	-88	1	1	7	2	439	4114.44	14	71.75	7.425	-1.57	-1.89	-2.05	0.16	0.14842	0.52	-0.653926	0	116	17	2.83321	6.39	1.85473	#NULL!	1.17	11.3
3	1	1	9	3.25281	1	1	1	-88	1	0	3	2	440	4243.73	14	76.55	10.075	0.72	-0.13	0.48	0.12	0.113329	0.66	-0.415515	0	85	5.3	1.66771	27.65	3.31963	4	1.27	14
3	1	2	8	-2.0392	1	1	1	-88	1	1	5	2	440	4243.73	14	72.3	7.425	-1.72	-1.7	-2.05	5.41	1.85786	0.6	-0.510826	1	112.86	58.905	4.07593	8.3121	2.11771	#NULL!	1.43	14
3	1	2	8	-2.03654	1	0	1	-88	1	1	7	2	441	4375.01	14	70.5	7.575	-0.99	-2.37	-1.89	1.07	0.727549	0.72	-0.328504	0	109	15.4	2.73437	6.64	1.89311	1	1.25	12.5
3	1	2	8	0.737226	1	0	1	-88	1	1	7	2	441	4375.01	14	71.15	7.425	-1.4	-2.13	-2.06	0.6	0.470004	0.68	-0.385662	0	94	6.8	1.91692	8.01	2.08069	2	0.88	11.5
3	1	2	6	-3.3396	1	1	0	-88	0	1	6	2	442	4508.3	14	74.95	8.15	-1.3	-0.75	-1.27	0.14	0.131028	0.59	-0.527633	0	102	22.5	3.11352	5.91	1.77665	1	1.15	11.3
9	1	2	8	-3.21998	1	1	1	-88	1	1	7	1	442	4508.3	14	74.45	8.775	-0.83	-1.67	-1.38	0.69	0.524729	1.02	0.0198026	3	121.54	24.15	3.18428	6.7392	1.90794	#NULL!	1.37	11.9
3	2	2	8	-1.71901	1	1	1	-88	1	1	7	1	442	4508.3	14	77.45	9.075	-1.17	-0.47	-1.07	0.51	0.41211	0.57	-0.562119	0	99	6.8	1.91692	13.78	2.62322	4	1.24	12.9
9	1	2	5	1.45498	1	0	1	-88	1	1	5	1	442	4508.3	14	74.35	8.075	-1.85	-1.71	-2.13	0.85	0.615186	1.05	0.0487902	3	87.55	9.525	2.25392	19.9104	2.99124	4	1.13	11.9
3	1	2	6	-0.0706742	1	0	1	-88	1	1	5	1	443	4643.59	14	78.9	10.275	0.03	0.1	0.05	0.32	0.277632	0.63	-0.462035	0	101	3.8	1.335	16.78	2.82019	4	1.01	12.5
3	1	2	6	-1.75678	1	0	1	-88	1	1	5	1	443	4643.59	14	74.45	9.25	-0.18	-1.68	-0.9	0.23	0.207014	0.86	-0.150823	0	107	39.3	3.67122	16.97	2.83145	3	2.17	12.7
3	1	2	8	-2.76828	1	0	1	-88	1	1	5	2	443	4643.59	14	72.1	7.875	-0.98	-1.81	-1.57	0.09	0.0861777	0.68	-0.385662	0	86	6.6	1.88707	21.11	3.04975	4	1.49	13.3
0	1	2	7	-2.30389	1	0	1	-88	1	1	6	2	443	4643.59	14	72.3	7.3	-1.91	-1.74	-2.21	0.38	0.322083	0.65	-0.430783	0	94	16.2	2.78501	8.23	2.10779	1	0.93	11.4
3	1	2	8	-0.1334	1	1	1	-88	1	1	6	2	444	4780.88	14	78.35	10.525	0.82	0.48	0.81	1.19	0.783902	0.72	-0.328504	0	114	11.2	2.41591	6.37	1.8516	#NULL!	1.07	10.8
3	2	2	8	-2.40906	1	1	1	-88	1	1	5	1	444	4780.88	14	77.65	8.6	-1.89	-0.42	-1.57	0.12	0.113329	0.6	-0.510826	0	101	4.4	1.4816	13.67	2.6152	4	1.1	12.5
3	1	2	4	-1.82988	0	0	1	-88	1	1	5	1	445	4920.17	14	73.55	7.85	-1.98	-2.07	-2.39	0.1	0.0953102	0.51	-0.673345	0	90	2.5	0.916291	21.5	3.06805	4	0.85	12.2
9	1	2	8	-2.40711	1	0	1	-88	1	1	7	1	446	5061.45	14	76.45	8.4	-1.89	-0.92	-1.79	0.16	0.14842	0.52	-0.653926	0	116	20.1	3.00072	5.8	1.75786	#NULL!	0.96	14.4
3	1	2	7	-1.34835	1	1	1	-88	1	1	6	1	446	5061.45	14	73.95	8.3	-1.38	-1.92	-1.9	4.62	1.72633	1.38	0.322083	3	109.18	24.6	3.20275	7.0464	1.95252	1	0.93	13.3
3	1	1	9	1.86551	1	1	1	-88	1	1	7	2	449	5497.32	14	74.5	8.425	-0.82	-1	-1.04	0.1	0.0953102	0.56	-0.579818	0	122	13.3	2.58776	7.89	2.0656	#NULL!	1.39	13.6
3	1	1	8	3.26917	0	0	1	-88	1	1	8	2	449	5497.32	14	77.65	10.225	0.65	0.15	0.55	0.55	0.438255	0.53	-0.634878	0	118	21.9	3.08649	9.45	2.24601	#NULL!	1.16	12.4
1	1	2	6	-4.69126	1	0	0	-88	0	1	5	1	450	5646.6	14	73.65	8.225	-1.42	-2.09	-2.01	0.08	0.076961	0.71	-0.34249	0	115	4.7	1.54756	14.34	2.66305	#NULL!	0.89	12.4
3	1	1	7	2.37049	1	1	1	-88	1	1	7	1	451	5797.89	14	62.85	8.625	2.85	-6.39	-1.59	0.44	0.364643	0.68	-0.385662	0	112	22.7	3.12236	9.11	2.20937	#NULL!	1.34	13.2
0	1	2	3	-3.38877	0	0	1	-88	1	0	4	2	452	5951.18	14	73.95	8.675	-0.36	-1.24	-0.81	0.9	0.641854	0.69	-0.371064	0	103	23.1	3.13983	5.18	1.64481	1	1.27	11.6
9	1	2	5	-2.08133	1	0	1	-88	1	1	6	2	453	6106.47	14	71.95	8.5	-0.08	-1.99	-0.98	1.29	0.828552	0.71	-0.34249	0	120	29.7	3.39115	6.92	1.93442	#NULL!	1.23	14.3
3	2	2	8	4.61986	1	0	1	-88	1	1	6	1	453	6106.47	14	76.3	8.075	-2.37	-1.08	-2.19	0.38	0.322083	0.53	-0.634878	0	109	11.7	2.45959	8.83	2.17816	4	1.57	11.9
0	1	2	6	-0.900516	1	0	1	-88	1	1	6	1	453	6106.47	14	77.1	9.4	-0.65	-0.76	-0.82	0.16	0.14842	0.65	-0.430783	0	111	4.4	1.4816	13.75	2.62104	#NULL!	1.11	13
3	1	1	9	2.98909	1	1	1	-88	1	1	7	2	453	6106.47	14	69.2	7.375	-0.91	-2.99	-2.2	2.6	1.28093	0.78	-0.248461	0	106	56.5	4.03424	16.39	2.79667	3	1	13.1
0	2	2	4	-4.64595	1	0	1	-88	1	0	5	1	454	6263.76	14	71.5	7.3	-2.28	-2.99	-3.09	0.62	0.482426	0.64	-0.446287	0	116	18.4	2.91235	7.21	1.97547	#NULL!	0.93	12.7
3	1	1	7	-1.97914	1	1	1	-88	1	1	7	2	455	6423.04	14	70.85	7.25	-1.58	-2.41	-2.35	0.58	0.457425	0.76	-0.274437	0	89	21	3.04452	16.46	2.80093	3	1.42	12.5
0	1	2	4	0.856117	0	0	1	-88	1	1	4	2	456	6584.33	14	70.45	7.625	-0.9	-2.57	-1.93	0.7	0.530628	0.81	-0.210721	0	103	6.1	1.80829	8.27	2.11263	2	1.06	10.1
3	1	2	9	-2.20979	1	0	1	-88	1	1	6	2	457	6747.62	15	73.5	8.225	-0.85	-1.47	-1.29	0.27	0.239017	0.4	-0.916291	0	115	4.7	1.54756	7.54	2.02022	#NULL!	0.79	11.6
3	1	2	8	-3.64421	1	1	1	-88	1	1	7	1	458	6912.91	15	76.1	8.9	-1.08	-1.22	-1.34	2.19	1.16002	1.47	0.385262	3	96.82	14.175	2.65148	19.1616	2.95291	3	0.74	13.1
3	1	2	6	-3.87931	1	0	1	-88	1	1	4	1	463	7769.35	15	78.1	9.375	-0.92	-0.5	-0.91	4.32	1.67147	0.78	-0.248461	0	87	14	2.63906	21.45	3.06572	3	1.02	13.5
0	2	2	4	-4.54334	0	0	1	-88	1	1	6	2	465	8125.92	15	73.5	6.875	-2.97	-1.57	-2.89	0	0	0.51	-0.673345	0	110	7.6	2.02815	8.5	2.14007	#NULL!	1.04	11.6
3	1	2	6	0.428742	1	1	1	-88	1	1	7	1	465	8125.92	15	72.3	6.7	-3.61	-2.81	-3.84	14.34	2.73046	0.9	-0.105361	1	99	8.239	2.10888	10.3515	2.33713	4	0.67	14.7
3	1	2	4	0.640289	1	1	1	-88	1	1	6	2	466	8307.21	15	71.45	8.475	0.02	-2.32	-1.09	0.06	0.0582689	0.65	-0.430783	0	112	16.9	2.82731	7.08	1.95727	#NULL!	0.99	14
3	1	2	7	-1.95287	1	0	1	-88	1	1	7	2	466	8307.21	15	76.05	8.825	-0.65	-0.65	-0.75	11.2	2.50144	1.85	0.615186	2	98.56	9.169	2.21583	11.7537	2.46417	4	0.65	11
3	1	2	7	6.0456	0	0	1	-88	1	1	6	2	466	8307.21	15	75.85	9.1	-0.25	-0.73	-0.49	0.04	0.0392207	0.45	-0.798508	0	130	10.9	2.38876	6.82	1.91986	#NULL!	1.19	11.4
3	1	2	4	-4.53238	1	0	1	-88	1	1	6	1	466	8307.21	15	76.4	9.5	-0.35	-1.21	-0.8	0.17	0.157004	0.77	-0.261365	0	103	3.4	1.22378	15.31	2.72851	4	1.33	11.8
3	2	2	7	-4.99635	1	0	1	-88	1	1	7	2	468	8675.78	15	77.45	8.775	-1.02	-0.17	-0.81	0.05	0.0487902	0.57	-0.562119	0	91	14.1	2.64617	11.14	2.41054	3	1.03	13.1
3	1	2	6	-0.509177	1	1	1	-88	1	1	7	1	469	8863.07	15	76.95	8.975	-1.19	-1.03	-1.34	0.12	0.113329	0.57	-0.562119	0	102	7.7	2.04122	13.35	2.59152	4	1.12	11.5
0	1	2	4	-3.33158	1	1	0	-88	0	1	6	2	471	9243.65	15	74.65	8.85	-0.29	-1.22	-0.76	24.31	3.2312	1.22	0.198851	2	137.76	30.528	3.41864	7.4472	2.00784	#NULL!	1.06	12.5
3	1	2	3	-3.28891	1	0	1	-88	1	0	4	2	474	9829.51	15	71.65	7.7	-1.11	-2.34	-1.95	0.28	0.24686	0.56	-0.579818	0	100	12.2	2.50144	14.97	2.70605	3	1	10.6
3	1	1	9	2.31364	1	1	0	-88	0	1	5	2	474	9829.51	15	75.35	8.275	-1.23	-1.01	-1.34	0.14	0.131028	0.69	-0.371064	0	121	151.8	5.02256	7.04	1.95161	#NULL!	2.03	10.6
3	1	1	8	4.71209	1	0	1	-88	1	1	5	2	477	10433.4	15	77.9	8.3	-1.77	-0.13	-1.33	2.58	1.27536	1.15	0.139762	3	124.63	56.025	4.0258	6.1824	1.82171	#NULL!	0.81	13.2
3	1	2	8	2.25377	1	1	1	-88	1	1	6	2	477	10433.4	15	79	9.225	-0.8	0.27	-0.45	0.44	0.364643	0.58	-0.544727	0	105	8.5	2.14007	10.73	2.37304	4	1.02	12.9
9	2	1	9	0.191282	0	0	0	-88	0	1	5	2	478	10638.7	15	74	7.9	-1.43	-1.54	-1.76	0.42	0.350657	0.93	-0.0725707	0	98	51.3	3.93769	6.98	1.94305	1	1.25	12.2
9	2	2	7	-3.19887	0	0	1	-88	1	1	7	2	478	10638.7	15	71.6	7.275	-1.76	-2.41	-2.47	0.17	0.157004	0.66	-0.415515	0	111	8.6	2.15176	7.77	2.05027	#NULL!	0.72	13.6
0	1	2	5	-3.2957	1	1	1	-88	1	1	7	2	480	11055.2	15	73.8	7.6	-1.83	-1.64	-2.1	0.2	0.182322	0.95	-0.0512933	0	89	4.1	1.41099	12.86	2.55412	4	1.19	11
3	1	1	7	-0.296439	1	1	1	-88	1	1	6	1	481	11266.5	15	70.8	7.5	-1.71	-3.58	-3.01	0.75	0.559616	1.01	0.00995033	3	95.79	2.325	0.84372	17.28	2.84955	4	0.96	7
3	1	1	8	-1.6255	1	0	1	-88	1	0	5	1	482	11479.8	15	76.8	9.675	-0.23	-1.26	-0.73	0.18	0.165514	0.5	-0.693147	0	119	13.1	2.57261	6.07	1.80336	#NULL!	1.17	13.6
3	1	2	4	-3.53463	1	0	1	-88	1	1	7	2	482	11479.8	15	75.55	9.325	0.08	-1.03	-0.39	0.16	0.14842	0.58	-0.544727	0	120	6.3	1.84055	8.65	2.15756	#NULL!	0.76	12.4
0	2	2	5	-2.99989	1	1	1	-88	1	1	6	2	483	11695.1	15	72.5	7.9	-1.04	-2.14	-1.79	7.91	2.18717	1.5	0.405465	2	115.36	68.317	4.22416	10.1877	2.32118	#NULL!	0.84	14.4
3	1	2	7	0.664667	1	1	1	-88	1	1	5	1	484	11912.4	15	74.55	9.175	-0.31	-2.15	-1.23	0.08	0.076961	0.96	-0.040822	0	127	20.9	3.03975	6.07	1.80336	#NULL!	1.68	14.7
9	1	2	7	-0.150568	0	0	0	-88	0	1	6	2	484	11912.4	15	77.35	9.875	0.33	-0.41	0.06	0.17	0.157004	0.79	-0.235722	0	126	12.9	2.55723	7.41	2.00283	#NULL!	1.44	13.7
3	1	2	9	0.533546	1	1	0	-88	0	1	8	1	485	12131.7	15	80.05	10.325	-0.16	-0.04	-0.16	0.74	0.553885	0.58	-0.544727	0	109	6.4	1.8563	17.6	2.8679	4	1.11	#NULL!
9	1	1	6	5.43833	1	1	1	-88	1	1	6	1	486	12353	15	73.55	8.2	-1.42	-2.57	-2.24	0.08	0.076961	0.56	-0.579818	0	78	3.3	1.19392	9.89	2.29152	4	1.08	14.7
3	1	2	5	1.43652	1	0	1	-88	1	1	6	2	486	12353	15	71.55	7.325	-1.67	-2.51	-2.46	0.41	0.34359	0.5	-0.693147	0	102	5.6	1.72277	10.39	2.34084	4	1.06	11.2
3	1	2	5	-4.59322	0	0	1	-88	1	0	3	1	487	12576.3	16	75.1	8.275	-1.74	-1.98	-2.17	13.53	2.67622	1.67	0.512824	2	114.24	20.034	2.99743	11.4753	2.4402	#NULL!	1.09	13.3
9	1	2	11	0.100363	1	0	1	-88	-99	1	8	1	489	13028.8	16	73.7	8.125	-1.59	-2.54	-2.35	5.73	1.90658	1.13	0.122218	2	122.08	12.667	2.539	6.4206	1.85951	#NULL!	0.66	12.4
3	1	1	8	8.12127	1	1	1	-88	-99	1	6	1	490	13258.1	16	75.6	8.775	-1.14	-1.82	-1.66	1.63	0.966984	0.78	-0.248461	0	109	12.2	2.50144	8.73	2.16677	3	1.01	12.5
9	2	2	9	0.332728	1	1	1	-88	-99	1	6	2	490	13258.1	16	74.5	7.725	-1.83	-1.5	-2.03	0.33	0.285179	0.63	-0.462035	0	105	11.5	2.44235	8.97	2.19389	4	0.85	12.5
3	1	2	6	-0.818705	1	1	1	-88	-99	1	7	1	490	13258.1	16	77.7	9.85	-0.22	-1.01	-0.62	0.11	0.10436	0.44	-0.820981	0	91	3.2	1.16315	16.99	2.83262	4	0.83	12.6
0	1	2	7	-2.56776	1	0	1	-88	-99	1	7	1	490	13258.1	16	77.25	9.65	-0.36	-1.18	-0.8	0.71	0.536493	0.79	-0.235722	0	89	4.7	1.54756	22.73	3.12369	4	0.9	13.1
15	1	2	7	1.11552	1	1	1	-88	-99	1	6	2	491	13489.4	16	77.25	8.6	-1.21	-0.53	-1.11	23.22	3.18718	1.55	0.438255	2	110.88	16.854	2.82459	8.0214	2.08211	#NULL!	0.87	11.8
6	1	1	6	-1.64127	0	0	1	-88	-99	1	7	1	492	13722.7	16	81.6	9.675	-1.3	0.47	-0.79	0.09	0.0861777	0.54	-0.616186	0	90	1.9	0.641854	17.2	2.84491	4	1.12	12.6
3	1	2	6	-4.20783	1	1	0	-88	-99	1	6	2	494	14195.3	16	81.35	9.85	-0.58	0.89	-0.01	0.13	0.122218	0.62	-0.478036	0	119	24.7	3.2068	8.63	2.15524	#NULL!	0.94	#NULL!
3	1	2	9	-0.28443	1	1	1	-88	-99	1	7	1	494	14195.3	16	78.9	9.225	-1.29	-0.6	-1.23	0.34	0.29267	0.57	-0.562119	0	100	6	1.79176	13.61	2.6108	4	1.5	12.8
3	1	2	6	-1.76904	1	0	1	-88	-99	1	7	1	494	14195.3	16	79.85	9.6	-1	-0.23	-0.87	0.07	0.0676586	0.57	-0.562119	0	102	5.4	1.6864	18.07	2.89425	4	0.86	13.4
9	1	1	8	9.59095	1	1	1	-88	-99	1	9	2	495	14434.6	16	75.4	8.875	-0.44	-1.24	-0.88	0.25	0.223144	0.74	-0.301105	0	113	49.1	3.89386	5.63	1.72811	#NULL!	1.16	13.2
0	1	2	2	-1.00965	0	0	1	-88	-99	0	4	2	496	14675.8	16	75.1	7.9	-1.7	-1.36	-1.86	0.99	0.688135	0.94	-0.0618754	0	111	12.7	2.5416	7.93	2.07065	#NULL!	0.95	10.6
6	1	2	10	-0.433144	1	0	1	-88	-99	1	8	1	496	14675.8	16	79.95	10.075	-0.44	-0.22	-0.45	0.3	0.262364	0.52	-0.653926	0	91	11.2	2.41591	13	2.56495	4	1.34	13.7
9	1	2	7	0.204024	1	0	0	-88	-99	1	5	1	496	14675.8	16	76.1	9.1	-0.81	-1.7	-1.36	1.39	0.871293	0.91	-0.0943107	0	101	20.6	3.02529	14.71	2.68853	3	1.25	#NULL!
0	2	2	6	-3.49555	0	0	1	-88	-99	1	6	2	496	14675.8	16	73.95	7.75	-1.64	-1.77	-2.03	0.89	0.636577	0.94	-0.0618754	0	80	8.9	2.18605	19.94	2.99273	4	0.84	14.4
3	1	2	9	-1.46035	1	0	1	-88	-99	1	7	2	497	14919.1	16	71.5	7.475	-1.42	-2.65	-2.36	18.32	2.96114	1.8	0.587787	2	117.6	10.017	2.30428	13.1718	2.57808	#NULL!	0.93	13.2
0	1	2	9	0.0865163	1	0	1	-88	-99	1	8	1	498	15164.4	16	74.5	7.85	-2.25	-2.34	-2.7	1.64	0.970779	0.83	-0.18633	0	107	23.1	3.13983	7.3	1.98787	1	0.99	7.5
3	1	2	7	-1.13869	1	1	1	-88	-99	1	7	1	498	15164.4	16	74.4	7.5	-2.81	-2.38	-3.1	0.26	0.231112	0.5	-0.693147	0	125	16.5	2.80336	7.49	2.01357	#NULL!	1.21	13.5
3	1	1	8	-2.99064	1	1	0	-88	-99	1	6	2	499	15411.7	16	72.05	7.35	-1.76	-2.48	-2.51	1.71	0.996949	1.12	0.113329	3	101.97	19.425	2.96656	8.3808	2.12594	3	0.97	10.5
3	2	2	8	-4.89608	1	0	1	-88	-99	1	6	2	499	15411.7	16	75.8	9.05	-0.3	-1.15	-0.73	0.14	0.131028	0.62	-0.478036	0	97	3.7	1.30833	20.49	3.01994	4	0.82	13.9
9	1	2	5	0.55082	1	1	1	-88	-99	1	5	1	499	15411.7	16	72.75	7.7	-1.99	-3.02	-2.88	0.22	0.198851	0.43	-0.84397	0	81	9.2	2.2192	28.85	3.36211	4	0.83	12.7
0	1	2	7	-0.682774	1	0	0	-88	-99	1	7	2	501	15912.3	16	75.05	8.075	-1.44	-1.44	-1.71	0.64	0.494696	0.83	-0.18633	0	111	9.9	2.29253	6.43	1.86097	#NULL!	0.94	11
3	1	2	6	-0.468004	1	0	0	-88	-99	1	6	1	502	16165.6	16	73.35	7.85	-1.92	-2.82	-2.73	1.09	0.737164	0.78	-0.248461	0	114	4.7	1.54756	10.62	2.36274	#NULL!	1.24	#NULL!
3	2	2	5	-2.3396	1	1	0	-88	-99	1	7	2	502	16165.6	16	72.35	7.925	-0.98	-2.4	-1.88	1.3	0.832909	1.24	0.215111	3	85.49	31.65	3.45474	12.1152	2.49446	3	0.6	13.1
3	2	2	8	-1.4966	0	0	1	-88	-99	0	3	1	503	16420.9	16	79.85	9.15	-1.6	-0.35	-1.36	16.01	2.8338	1.08	0.076961	2	129.92	12.455	2.52212	6.8208	1.91998	#NULL!	1.05	10.7
0	1	2	6	-2.89338	1	88	1	-88	-99	1	7	1	503	16420.9	16	75.75	7.975	-2.39	-1.92	-2.6	0.81	0.593327	1.46	0.378436	3	113.3	125.25	4.83031	6.4032	1.8568	#NULL!	0.88	13
9	1	1	7	10.9678	1	1	1	-88	-99	1	8	2	503	16420.9	16	73.65	7.75	-1.57	-1.95	-2.07	0.36	0.307485	0.74	-0.301105	0	113	34.1	3.5293	7.95	2.07317	#NULL!	1.59	13.5
0	1	2	6	-0.381825	1	0	1	-88	-99	1	6	2	503	16420.9	16	77.35	9	-0.71	-0.64	-0.8	0.08	0.076961	0.5	-0.693147	0	115	13.8	2.62467	9.1	2.20827	#NULL!	1.19	10.7
0	1	1	8	1.49266	1	0	1	-88	-99	1	7	1	505	16937.4	16	75.45	9.125	-0.62	-2.05	-1.4	6.35	1.9947	1.09	0.0861777	2	97.44	3.551	1.26723	13.311	2.58859	4	0.89	12.3
12	1	2	6	-0.767035	0	0	0	-88	-99	0	5	1	508	17727.3	16	82.55	9.225	-2.14	0.62	-1.31	0.01	0.00995033	0.63	-0.462035	0	112	32.2	3.47197	6.28	1.83737	#NULL!	0.93	14.7
6	2	2	8	-0.392858	0	1	1	-88	-99	1	6	1	508	17727.3	16	74.6	9.15	-0.35	-2.41	-1.38	0.4	0.336472	0.56	-0.579818	0	117	18	2.89037	8.29	2.11505	#NULL!	1	13.7
3	1	2	10	-0.741628	1	1	1	-88	-99	1	6	1	509	17994.6	16	74.6	8.025	-2	-2.42	-2.57	0.27	0.239017	0.45	-0.798508	0	115	14.4	2.66723	7.47	2.01089	#NULL!	0.94	13.2
9	1	1	6	7.45835	1	0	1	-88	-99	1	5	1	509	17994.6	16	81	10.45	-0.21	0.01	-0.19	0.41	0.34359	0.66	-0.415515	0	101	5.1	1.62924	13.38	2.59376	4	1.56	7.2
0	1	2	8	-3.45449	1	0	1	-88	-99	1	7	1	510	18263.9	16	76	9.075	-0.82	-1.9	-1.47	3.11	1.41342	1.16	0.14842	3	105.06	16.125	2.78037	6.336	1.84625	1	1.13	12
0	1	1	7	4.98053	1	1	1	-88	-99	1	-99	2	510	18263.9	16	73.1	7.8	-1.35	-2.23	-2.06	0.14	0.131028	0.45	-0.798508	0	114	28.5	3.3499	12.54	2.52892	#NULL!	0.77	#NULL!
12	2	2	9	1.92169	1	1	1	-88	-99	1	7	1	511	18535.2	16	74.1	8.05	-1.81	-2.64	-2.55	6.38	1.99877	0.8	-0.223144	1	134.64	22.176	3.09901	9.064	2.20431	#NULL!	1.19	13.6
3	1	2	8	0.502711	1	1	1	-88	-99	1	6	2	512	18808.4	16	74.4	8.85	-0.23	-1.79	-1	0.5	0.405465	0.65	-0.430783	0	111	33.9	3.52342	6.77	1.9125	#NULL!	1.24	13.4
9	1	1	11	0.16472	1	1	0	-88	-99	1	9	2	512	18808.4	16	75.05	8.825	-0.42	-1.56	-1.02	0.17	0.157004	0.59	-0.527633	0	116	5.4	1.6864	13.08	2.57108	#NULL!	1.08	12.7
0	1	2	7	-0.1334	1	1	1	-88	-99	1	7	1	512	18808.4	16	78.15	9.125	-1.26	-1.11	-1.44	0.07	0.0676586	0.54	-0.616186	0	83	4.3	1.45862	23.48	3.15615	4	0.86	10.9
9	1	2	7	1.36346	1	88	1	-88	-99	1	7	1	513	19083.7	16	76.4	9.3	-0.61	-1.79	-1.27	0.57	0.451076	0.71	-0.34249	0	110	20.9	3.03975	7.6	2.02815	#NULL!	1.03	13.7
3	1	2	6	3.41174	1	1	1	-88	-99	1	6	1	514	19361	16	76.85	8.425	-1.96	-1.63	-2.16	0.2	0.182322	0.46	-0.776529	0	112	14.1	2.64617	7.32	1.99061	#NULL!	1.1	13.9
0	1	2	5	2.22962	0	0	1	-88	-99	1	5	1	514	19361	16	74.5	8.775	-0.85	-2.52	-1.8	13.95	2.70471	0.87	-0.139262	1	95.04	11.088	2.40586	7.4675	2.01056	2	0.7	11
3	1	2	7	1.42899	1	0	1	-88	-99	1	7	1	515	19640.3	16	74.9	7.975	-2.16	-2.38	-2.66	0.54	0.431782	0.56	-0.579818	0	102	11.7	2.45959	7.23	1.97824	2	1.04	11.9
3	1	2	8	-0.56062	1	1	1	-88	-99	1	6	1	515	19640.3	16	79.05	9.7	-0.7	-0.8	-0.9	0.16	0.14842	0.69	-0.371064	0	97	34.5	3.54096	7.25	1.981	1	1.43	12.2
0	2	2	6	1.3749	0	1	1	-88	-99	1	7	2	515	19640.3	16	78.75	10.45	0.66	-0.29	0.35	0.78	0.576613	0.75	-0.287682	0	104	9.4	2.24071	19.34	2.96218	4	1.16	13.4
0	2	2	8	-3.13198	1	1	1	-88	-99	1	8	1	521	21358	17	76.05	8.2	-2.1	-2.01	-2.44	1.96	1.08519	0.72	-0.328504	0	105	9.8	2.28238	10.23	2.32532	4	0.99	13.3
3	1	2	8	-3.61893	1	0	1	-88	-99	1	6	1	523	21946.6	17	78.55	10.05	-0.16	-1.09	-0.62	2.2	1.16315	0.7	-0.356675	0	83	3.5	1.25276	21.94	3.08831	4	0.74	13.8
0	1	2	4	-3.08604	1	0	1	-88	-99	1	6	1	524	22243.9	17	74.55	7.15	-3.45	-2.61	-3.62	4.11	1.6312	0.77	-0.261365	0	94	5.5	1.70475	13.59	2.60933	4	0.94	12.9
6	1	2	8	6.00589	0	0	1	-88	-99	1	7	2	525	22543.2	17	72.2	7.75	-1.18	-2.7	-2.21	0.8	0.587787	0.57	-0.562119	0	99	25.5	3.23868	12.22	2.50307	3	1.56	12
3	1	2	3	-1.00653	0	1	1	-88	-99	1	6	2	525	22543.2	17	71.85	8.475	-0.09	-2.82	-1.44	2.86	1.35067	1.24	0.215111	3	98.88	14.25	2.65676	12.6336	2.53636	3	0.99	12.5
3	1	2	5	-4.40392	1	1	1	-88	-99	1	7	1	526	22844.5	17	78.4	9.825	-0.41	-1.18	-0.85	5.63	1.8916	1.04	0.0392207	2	91.84	6.042	1.79874	12.6933	2.54107	4	0.8	11.8
0	1	2	11	-2.76828	1	1	1	-88	-99	1	6	1	527	23147.8	17	75.7	9	-0.84	-2.21	-1.64	1.41	0.879627	0.55	-0.597837	0	114	7.8	2.05412	11.25	2.42037	#NULL!	0.89	11.8
3	1	2	6	1.24292	1	0	1	-88	-99	1	7	1	527	23147.8	17	74.15	8.725	-0.82	-2.79	-1.92	4.34	1.67523	0.8	-0.223144	0	97	5.1	1.62924	18.37	2.91072	4	0.77	10.7
9	1	1	8	3.27567	1	0	0	-88	-99	1	7	2	528	23453.1	17	80.25	9.875	-0.3	0.08	-0.18	0.05	0.0487902	0.85	-0.162519	0	115	15.1	2.71469	7.49	2.01357	#NULL!	0.95	13.2
6	2	2	7	5.09906	1	1	1	-88	-99	1	8	2	528	23453.1	17	79.95	9.325	-0.89	-0.03	-0.66	3.1	1.41099	1.28	0.24686	3	115.36	8.925	2.18886	7.9584	2.07423	#NULL!	0.92	13.7
3	1	2	8	-0.121077	0	0	1	-88	-99	1	7	1	528	23453.1	17	77.5	9.45	-0.67	-1.54	-1.21	0.02	0.0198026	0.32	-1.13943	0	106	13.2	2.58022	10.98	2.39608	3	1.04	11.6
3	2	2	4	-2.67751	1	1	0	-88	-99	1	3	2	528	23453.1	17	74.5	7.975	-1.45	-1.93	-1.98	4.48	1.70111	1.4	0.336472	3	123.6	15.3	2.72785	12.2496	2.50549	#NULL!	1.38	11.6
3	1	1	10	2.43087	1	1	1	-88	-99	1	8	1	532	24694.2	17	66.5	5.525	-4.04	-5.71	-5.44	24.9	3.25424	0.88	-0.127833	1	112.86	43.659	3.77641	5.6856	1.73794	#NULL!	0.6	15.1
3	2	2	6	1.52983	1	1	1	-88	-99	1	8	1	533	25009.5	17	75.6	8.2	-1.98	-2.31	-2.5	0.94	0.662688	1	0	0	112	17.2	2.84491	8.25	2.11021	#NULL!	0.97	11.9
3	1	2	7	0.472398	1	0	1	-88	-99	1	7	2	534	25326.8	17	76.6	8.525	-1.17	-1.26	-1.44	3.71	1.54969	1.08	0.076961	3	94.76	7.05	1.95303	9.3792	2.23849	4	0.66	12.8
0	2	2	7	-1.61226	1	1	0	-88	-99	1	5	2	534	25326.8	17	77.2	9.875	0.36	-1.06	-0.22	0.11	0.10436	0.91	-0.0943107	0	94	7.8	2.05412	16.06	2.77633	4	1.58	#NULL!
0	2	2	7	-4.0819	0	0	1	-88	-99	1	7	1	534	25326.8	17	75.4	8.575	-1.37	-2.4	-2.11	0.25	0.223144	0.52	-0.653926	0	83	8.9	2.18605	18.9	2.93916	4	0.84	12.7
3	1	1	6	-1.08608	1	1	1	-88	-99	1	6	2	534	25326.8	17	76.25	8.475	-1.16	-1.39	-1.49	2.4	1.22378	0.99	-0.0100503	0	88	8.5	2.14007	21.19	3.05353	4	1.14	12
3	1	2	9	-0.493982	1	0	1	-88	-99	1	7	1	534	25326.8	17	77.4	11.15	1.32	-1.65	0.25	5.48	1.86872	0.91	-0.0943107	1	84.15	3.234	1.17372	25.8118	3.25083	4	0.95	12.8
3	1	2	5	-4.72168	1	1	1	-88	-99	1	6	1	535	25646.1	17	75.4	7.95	-2.33	-2.41	-2.79	3.11	1.41342	1.22	0.198851	3	103	78	4.35671	12.7584	2.54619	3	1.7	14.1
3	1	2	8	-0.051315	1	0	1	-88	-99	1	6	1	537	26290.6	17	79.2	9.75	-0.67	-1.01	-0.97	0.19	0.173953	0.4	-0.916291	0	124	15	2.70805	8.32	2.11866	#NULL!	1.09	13.4
3	1	2	6	-2.268	1	1	1	-88	-99	1	7	2	541	27603.8	17	75.25	8.325	-1.13	-1.81	-1.69	4.47	1.69928	0.87	-0.139262	0	105	41.9	3.73529	6.07	1.80336	1	0.76	12.2
6	2	2	8	0.0709606	1	1	1	-88	-99	1	7	1	541	27603.8	17	75.7	8.1	-2.17	-2.36	-2.66	0.06	0.0582689	0.44	-0.820981	0	113	19.4	2.96527	6.94	1.9373	#NULL!	1.23	13.5
9	1	2	8	0.433037	0	0	1	-88	-99	1	8	1	542	27937.1	17	79.65	10.325	-0.07	-0.9	-0.49	0.18	0.165514	0.62	-0.478036	0	130	32.7	3.48738	5.17	1.64287	#NULL!	1.68	14.6
3	1	2	6	1.45801	1	1	1	-88	-99	1	6	1	542	27937.1	17	79.5	8.75	-2.09	-0.96	-1.97	17.43	2.91398	1.17	0.157004	2	135.52	22.366	3.10754	9.2568	2.22536	#NULL!	1.21	12
6	1	2	6	-1.03999	1	1	1	-88	-99	0	3	1	544	28609.7	17	78.15	8.775	-1.75	-1.48	-1.96	3.17	1.42792	1.54	0.431782	3	88.58	18.9	2.93916	12.4512	2.52182	3	0.74	12.5
3	1	2	8	0.932313	88	0	1	-88	-99	1	7	1	544	28609.7	17	77.05	8.6	-1.74	-1.89	-2.14	0.24	0.215111	0.45	-0.798508	0	124	34	3.52636	6.12	1.81156	#NULL!	0.96	#NULL!
3	1	2	5	-2.33825	1	0	1	-88	-99	1	6	2	544	28609.7	17	75.4	8	-1.62	-1.79	-2.04	1.06	0.722706	0.52	-0.653926	0	112	11.1	2.40695	8.53	2.14359	#NULL!	1.01	13.3
3	1	2	9	2.13272	1	1	1	-88	-99	1	7	1	544	28609.7	17	76.55	9.05	-0.98	-2.08	-1.68	1.03	0.708036	0.63	-0.462035	0	114	22.6	3.11795	11.01	2.3988	#NULL!	0.89	12.3
9	1	1	8	1.43374	1	1	1	-88	-99	1	6	1	544	28609.7	17	76.4	8.425	-1.85	-2.13	-2.33	1.46	0.900161	0.8	-0.223144	0	101	20.2	3.00568	14.22	2.65465	3	0.97	12.8
3	1	2	6	-2.26048	1	1	0	-88	-99	1	5	1	547	29633.5	17	81.1	10.1	-0.65	-0.42	-0.71	18.21	2.95543	1.72	0.542324	2	115.36	29.309	3.37789	10.7358	2.37358	#NULL!	1.5	12.4
1	1	2	6	-2.33948	1	1	0	-88	-99	1	5	1	547	29633.5	17	82.85	11.15	0.15	0.23	0.18	0.08	0.076961	0.67	-0.400478	0	83	6.8	1.91692	21.26	3.05683	4	1.14	12.2
0	2	1	4	0.790791	1	1	0	-88	-99	1	5	2	548	29978.8	18	77	8.675	-1.06	-1.28	-1.38	0.14	0.131028	0.55	-0.597837	0	100	28.9	3.36384	7.75	2.04769	1	1.27	13.3
0	1	2	7	-0.465701	1	0	1	-88	-99	1	7	2	548	29978.8	18	73.35	7.375	-2.08	-2.54	-2.78	0.44	0.364643	0.67	-0.400478	0	84	8.5	2.14007	17.46	2.85991	4	1.23	13.4
9	1	2	7	3.75655	1	1	1	-88	-99	1	6	1	548	29978.8	18	78	9.625	-0.57	-1.58	-1.15	3.61	1.52823	0.82	-0.198451	0	85	4.7	1.54756	17.99	2.88982	4	1.05	13.1
3	2	2	5	-0.582158	1	0	0	-88	-99	1	5	2	549	30326.1	18	75.8	9.125	-0.21	-1.7	-0.95	0.49	0.398776	0.84	-0.174353	0	83	8.1	2.09186	14.87	2.69935	4	0.92	12.1
3	2	2	6	1.41759	1	1	0	-88	-99	1	5	2	551	31026.7	18	76.15	7.95	-1.88	-1.6	-2.14	1.81	1.03318	1.07	0.0676586	3	111.24	30.9	3.43076	5.1648	1.64187	#NULL!	1.14	12.6
9	1	2	5	4.69781	0	0	1	-88	-99	1	4	2	555	32451.8	18	74	7.925	-1.4	-2.38	-2.19	0.26	0.231112	0.71	-0.34249	0	99	8.2	2.10413	9.49	2.25024	4	1.23	13.6
0	1	2	6	1.91923	1	1	1	-88	-99	1	6	2	555	32451.8	18	77.4	9.925	0.37	-1.22	-0.29	1.97	1.08856	1.2	0.182322	3	110.21	18.825	2.93519	10.0512	2.30769	#NULL!	1.23	12.2
3	1	2	5	2.71668	1	1	1	-88	-99	1	6	1	557	33176.4	18	77.45	8.325	-2.26	-1.88	-2.5	15.14	2.7813	1.2	0.182322	2	124.32	32.542	3.48253	7.5255	2.0183	#NULL!	0.84	12.3
0	2	2	7	-4.96371	1	1	0	-88	-99	0	4	2	560	34278.3	18	76.1	8.875	-0.59	-1.71	-1.25	0.07	0.0676586	0.44	-0.820981	0	116	5.2	1.64866	8.12	2.09433	#NULL!	1.49	12.8
3	1	2	7	0.516283	1	0	0	-88	-99	1	7	2	560	34278.3	18	74.6	7.375	-2.4	-2.23	-2.86	0.8	0.587787	0.69	-0.371064	0	120	15	2.70805	8.77	2.17134	#NULL!	0.97	13.7
0	1	2	8	0.282273	1	0	1	-88	-99	1	6	1	561	34649.5	18	75.85	9.325	-0.45	-2.51	-1.51	0.37	0.314811	0.81	-0.210721	0	115	16.5	2.80336	7.95	2.07317	#NULL!	1.62	11.1
3	1	2	7	-0.826154	1	1	0	-88	-99	1	6	1	562	35022.8	18	80.45	10.1	-0.51	-0.83	-0.79	2.49	1.2499	0.9	-0.105361	0	80	14.5	2.67415	11.01	2.3988	3	0.7	15.9
3	1	1	9	10.3191	1	1	0	-88	-99	1	4	2	564	35775.4	18	78.6	9.825	0.01	-0.9	-0.42	0.55	0.438255	0.38	-0.967584	0	134	26	3.2581	5.03	1.61542	#NULL!	1.5	11.7
0	1	2	9	0.433037	1	0	1	-88	-99	1	6	2	564	35775.4	18	74.4	8.45	-0.75	-2.33	-1.69	0.32	0.277632	0.96	-0.040822	0	114	21.5	3.06805	6.23	1.82938	#NULL!	1.23	12.9
0	1	2	6	-0.139022	1	0	1	-88	-99	1	7	2	565	36154.7	18	77.55	8.175	-1.88	-1.27	-1.98	0.36	0.307485	0.62	-0.478036	0	107	52.2	3.95508	10.16	2.31846	3	1.03	13.8
0	1	2	4	-4.21462	1	1	1	-88	-99	1	4	2	565	36154.7	18	74.2	7.55	-2.01	-2.41	-2.67	0	0	0.66	-0.415515	0	120	19.1	2.94969	10.54	2.35518	#NULL!	1.28	12.9
9	1	2	8	-1.83119	1	0	1	-88	-99	1	7	1	566	36536	18	77.55	8.775	-1.61	-1.94	-2.08	24.94	3.25579	1.27	0.239017	2	107.52	10.918	2.39041	7.6473	2.03435	2	0.72	14
9	1	2	9	-1.64328	1	1	0	-88	-99	1	5	1	566	36536	18	84.2	10.85	-0.51	0.5	-0.17	0.19	0.173953	0.47	-0.755023	0	100	9.7	2.27213	12.36	2.51447	4	1.03	11.7
1	1	2	5	-0.355435	1	1	0	-88	-99	1	6	2	568	37304.6	18	77.5	8.325	-1.65	-1.32	-1.84	2.56	1.26976	0.48	-0.733969	0	123	40.2	3.69387	8.19	2.10291	#NULL!	0.97	15.2
3	1	2	4	-0.448083	1	0	0	-88	-99	1	5	2	568	37304.6	18	74.45	8.025	-1.37	-2.36	-2.16	1.25	0.81093	1.07	0.0676586	3	111.24	36	3.58352	16.4736	2.80176	#NULL!	1.44	#NULL!
0	1	2	8	-0.647248	1	88	0	-88	-99	1	6	1	572	38865.7	18	77.25	8.675	-1.69	-2.11	-2.21	0.67	0.512824	0.59	-0.527633	0	114	15.7	2.75366	10.61	2.3618	#NULL!	1.27	#NULL!
9	1	2	6	-3.33158	1	0	1	-88	-99	1	6	2	573	39261	18	75.35	7.55	-2.3	-2.1	-2.72	0.35	0.300105	0.73	-0.314711	0	119	10.5	2.35138	11.69	2.45873	#NULL!	1.45	14.2
3	1	2	7	-0.191159	1	1	1	-88	-99	1	7	2	574	39658.3	18	80.25	9.2	-1.11	-0.45	-1.02	0.5	0.405465	0.8	-0.223144	0	119	47.9	3.86912	6.41	1.85786	#NULL!	1.57	13.3
3	1	2	8	-4.94964	0	0	1	-88	-99	1	8	1	574	39658.3	18	80.7	9.6	-1.19	-0.88	-1.31	0.06	0.0582689	0.82	-0.198451	0	81	5.3	1.66771	17.19	2.84433	4	1.13	14.4
0	1	2	6	-4.20783	0	1	1	-88	-99	1	7	2	575	40057.6	18	82.5	8.6	-2.47	0.3	-1.6	3.87	1.58309	1.25	0.223144	3	122.57	11.7	2.45959	8.9952	2.19669	#NULL!	1.05	11
3	2	2	6	-5.30127	1	1	1	-88	-99	1	5	1	575	40057.6	18	79.15	9.1	-1.51	-1.45	-1.79	0.44	0.364643	0.92	-0.0833816	0	78	5	1.60944	14.85	2.698	4	0.97	12.6
0	1	2	5	-0.883838	1	0	1	-88	-99	1	6	1	577	40862.2	18	78.6	9.825	-0.45	-1.67	-1.12	0	0	0.5	-0.693147	0	86	4.3	1.45862	15.36	2.73177	4	1.11	11.6
3	1	2	12	-1.1611	1	0	0	-88	-99	1	6	1	577	40862.2	18	79.85	9.75	-0.81	-1.22	-1.19	4.21	1.65058	0.69	-0.371064	0	103	14.8	2.69463	21.93	3.08786	3	0.89	13.4
3	1	2	7	2.02823	1	0	1	-88	-99	1	7	1	578	41267.4	18	75.6	8.975	-0.86	-2.77	-1.94	0.3	0.262364	0.46	-0.776529	0	94	5.5	1.70475	14.33	2.66236	4	1.11	12.1
9	1	2	9	-3.28212	1	0	0	-88	-99	1	7	2	580	42084	19	74.35	7.525	-2.1	-2.51	-2.79	2.52	1.25846	0.93	-0.0725707	0	102	14.6	2.68102	7.29	1.9865	1	0.83	13.9
15	1	1	8	0.958283	1	0	0	-88	-99	1	6	2	585	44160.5	19	74.6	8.425	-0.84	-2.47	-1.83	0.67	0.512824	0.71	-0.34249	0	123	22.7	3.12236	6.54	1.87794	#NULL!	1.59	11.8
3	1	2	5	-3.07466	1	1	1	-88	-99	1	6	2	585	44160.5	19	76.4	8.775	-0.79	-1.86	-1.49	3.73	1.55393	0.7	-0.356675	0	95	14.2	2.65324	7.91	2.06813	1	1	12.8
12	1	2	9	1.84788	1	1	1	-88	-99	1	6	2	585	44160.5	19	78.35	8.425	-1.7	-1.21	-1.83	1.56	0.940007	0.97	-0.0304592	0	126	17.7	2.87356	8.42	2.13061	#NULL!	1.08	13.6
0	1	2	8	0.894398	1	1	1	-88	-99	1	7	2	587	45005	19	77.7	8.85	-0.98	-1.45	-1.42	1.26	0.815365	0.68	-0.385662	0	108	9	2.19722	12.34	2.51285	4	1.07	10.9
3	1	1	3	-1.0012	1	1	0	-88	-99	0	3	1	589	45857.6	19	78.45	10.025	-0.17	-1.85	-1.01	1.13	0.756122	0.84	-0.174353	0	102	18.6	2.92316	9.1	2.20827	3	0.88	14.1
3	1	2	5	3.6176	1	0	1	-88	-99	1	7	1	589	45857.6	19	81.5	9.425	-1.61	-0.75	-1.56	11.85	2.55334	1.4	0.336472	2	119.84	31.323	3.44435	12.3018	2.50975	#NULL!	0.68	13.7
0	1	2	5	-1.82043	1	0	0	-88	-99	1	5	2	592	47151.5	19	74.95	8.225	-1.2	-2.42	-2.08	0.15	0.139762	0.54	-0.616186	0	124	60	4.09434	5.47	1.69928	#NULL!	1.25	#NULL!
3	1	2	4	-4.46476	1	1	1	-88	-99	0	2	2	598	49793.2	19	75.2	7.7	-2.03	-2.39	-2.69	0.07	0.0676586	0.45	-0.798508	0	89	5.8	1.75786	12.58	2.53211	4	1.19	10.5
9	1	2	5	-2.19359	1	1	1	-88	-99	1	6	1	598	49793.2	19	78.25	9.075	-1.35	-2.01	-1.94	0.23	0.207014	0.55	-0.597837	0	94	6.9	1.93152	20.74	3.03206	4	1.21	13.4
9	2	2	9	0.773078	1	1	1	-88	-99	1	7	1	599	50240.5	19	81.15	9.325	-1.66	-0.98	-1.7	3.59	1.52388	1.06	0.0582689	3	120.51	21.675	3.07616	7.4592	2.00945	#NULL!	0.84	14.1
3	1	2	6	-1.01701	1	1	0	-88	-99	1	5	2	599	50240.5	19	78.9	8.9	-1.18	-1.17	-1.44	0.07	0.0676586	0.58	-0.544727	0	110	18.4	2.91235	8.05	2.08567	#NULL!	1.32	12.9
0	1	1	6	2.92285	1	0	0	-88	-99	1	5	2	599	50240.5	19	77.95	8.5	-1.5	-1.48	-1.83	0.06	0.0582689	0.49	-0.71335	0	119	11.9	2.47654	9.19	2.21812	#NULL!	1.59	#NULL!
0	2	2	5	-3.68639	1	0	1	-88	-99	1	6	1	599	50240.5	19	78.85	9.825	-0.5	-1.8	-1.24	0.49	0.398776	0.68	-0.385662	0	#NULL!	25	3.21888	13.66	2.61447	#NULL!	1.09	#NULL!
0	1	1	6	-3.43686	1	1	0	-88	-99	1	4	1	599	50240.5	19	79.1	8.45	-2.44	-1.72	-2.58	0.36	0.307485	0.7	-0.356675	0	86	9.2	2.2192	17.23	2.84665	4	1.17	12.4
3	1	2	9	1.74246	1	1	1	-88	-99	1	6	1	601	51141.1	19	79	9.275	-1.25	-1.77	-1.76	0.47	0.385262	0.93	-0.0725707	0	113	16.5	2.80336	6.41	1.85786	#NULL!	1.13	14.8
3	1	2	5	-2.20979	1	1	1	-88	-99	1	5	1	601	51141.1	19	81.25	9.375	-1.62	-0.97	-1.67	0.52	0.41871	0.69	-0.371064	0	90	18.2	2.90142	10.04	2.30658	3	1.35	13.4
0	1	2	3	-4.40392	1	0	1	-88	-99	1	5	2	602	51594.3	19	77.6	8.275	-1.74	-1.63	-2.09	0.58	0.457425	0.6	-0.510826	0	113	12.8	2.54945	6.96	1.94018	#NULL!	1.12	15.2
3	1	2	6	-4.41071	1	0	0	-88	-99	1	6	1	602	51594.3	19	78	9.75	-0.41	-2.14	-1.32	19.92	3.04071	1	0	1	102.96	44.583	3.79735	6.9937	1.94501	1	0.74	12.8
3	1	1	4	0.801276	1	0	1	-88	-99	1	6	1	604	52506.9	19	80.65	9.375	-1.48	-1.21	-1.68	1.39	0.871293	1.25	0.223144	3	124.63	23.25	3.14631	8.2368	2.10861	#NULL!	1.17	12.8
3	2	2	4	-4.76762	1	1	0	-88	-99	1	5	2	606	53427.5	19	77.75	8.025	-2.14	-1.62	-2.38	2.84	1.34547	1.04	0.0392207	3	110.21	26.85	3.29027	7.4976	2.01458	#NULL!	0.94	14.1
3	1	2	9	-2.33014	1	0	0	-88	-99	1	6	1	607	53890.8	19	79.2	10.075	-0.27	-1.76	-1.05	1.13	0.756122	0.82	-0.198451	0	105	20.2	3.00568	6.58	1.88403	1	1.51	13.4
12	1	2	6	0.300105	1	1	1	-88	-99	1	6	2	607	53890.8	19	75.15	7.575	-2.22	-2.49	-2.89	0.75	0.559616	0.57	-0.562119	0	113	30.6	3.421	8.82	2.17702	#NULL!	1.32	12.1
9	1	2	4	-0.753891	0	1	1	-88	-99	1	6	2	607	53890.8	19	76.4	7.875	-2.05	-2.08	-2.55	0.1	0.0953102	0.56	-0.579818	0	96	4.2	1.43508	19.07	2.94812	4	1.12	11.7
12	1	2	11	-4.40392	0	0	0	-88	-99	1	6	1	608	54356.1	19	80.15	9.425	-1.3	-1.43	-1.65	0.13	0.122218	0.63	-0.462035	0	111	11.7	2.45959	13.53	2.60491	#NULL!	0.92	14
3	1	1	7	0.335429	1	1	1	-88	-99	1	9	2	608	54356.1	19	78	9.175	-0.64	-1.55	-1.23	0	0	0.38	-0.967584	0	88	4.2	1.43508	19.98	2.99473	4	1.17	12
1	1	1	8	9.69546	1	1	0	-88	-99	1	5	1	609	54823.4	20	81.2	10.85	0.2	-1.07	-0.4	0.12	0.113329	0.52	-0.653926	0	121	24.9	3.21487	5.8	1.75786	#NULL!	1.22	19.7
0	1	2	9	-2.40457	1	1	1	-88	-99	1	6	1	609	54823.4	20	81.25	9.225	-1.82	-1.05	-1.85	0.32	0.277632	0.91	-0.0943107	0	112	18.7	2.92852	6.3	1.84055	#NULL!	0.87	12.3
3	1	2	5	3.11201	1	0	1	-88	-99	1	6	2	609	54823.4	20	73.2	8.9	0.12	-3.16	-1.49	8.26	2.2257	1.67	0.512824	2	116.48	41.976	3.7371	6.8034	1.91742	#NULL!	0.92	11.8
6	1	2	5	0.576879	0	1	1	-88	-99	1	10	2	609	54823.4	20	76.35	8.275	-1.46	-2.11	-2.12	0.9	0.641854	1.13	0.122218	3	115.36	8.85	2.18042	13.2096	2.58094	#NULL!	1.28	14.7
3	2	2	8	-4.32603	1	1	1	-88	-99	1	7	1	611	55763.9	20	76.25	8.5	-1.69	-2.84	-2.58	1.16	0.770108	0.79	-0.235722	0	114	23.7	3.16548	13.27	2.58551	#NULL!	1.01	13.7
0	2	2	4	-2.56767	1	0	1	-88	-99	1	5	2	612	56237.2	20	75.5	8.225	-1.33	-2.42	-2.19	1.28	0.824175	0.65	-0.430783	0	98	54.5	3.9982	14.01	2.63977	3	1.15	12.2
3	1	2	5	-2.12035	0	0	1	-88	-99	1	7	2	616	58150.4	20	78.45	9.575	-0.25	-1.48	-0.92	1.85	1.04732	1.03	0.0295588	3	122.57	11.25	2.42037	6.0096	1.79336	#NULL!	1.41	11.4
0	1	2	7	-3.92778	1	0	1	-88	-99	1	7	1	616	58150.4	20	77.85	9.7	-0.43	-2.32	-1.43	0.12	0.113329	0.64	-0.446287	0	117	10.6	2.36085	8.59	2.1506	#NULL!	1.16	11.7
0	1	2	7	-4.72168	1	1	1	-88	-99	1	7	1	616	58150.4	20	79.6	8.6	-2.33	-1.71	-2.5	0.55	0.438255	0.72	-0.328504	0	106	14.3	2.66026	9.38	2.23858	3	1.07	11.2
3	1	1	4	-1.27929	1	0	1	-88	-99	1	5	1	618	59119	20	82.35	9.775	-1.35	-0.75	-1.38	0.27	0.239017	0.66	-0.415515	0	118	37.1	3.61362	5.32	1.67147	#NULL!	1.06	11.8
3	1	1	7	3.37977	1	1	0	-88	-99	1	5	1	618	59119	20	75.9	8.475	-1.65	-3.03	-2.65	0.39	0.329304	0.48	-0.733969	0	102	3.3	1.19392	15.07	2.71271	4	1.53	12.5
3	1	2	6	#NULL!	1	1	1	-88	-99	1	6	2	618	59119	20	86.35	15.575	3.18	1.11	2.88	0.85	0.615186	0.72	-0.328504	0	90	8.4	2.12823	15.54	2.74342	4	1.55	13.4
9	2	2	5	3.23477	1	1	1	-88	-99	1	7	1	620	60095.5	20	78.05	8.95	-1.47	-2.29	-2.17	0.15	0.139762	0.4	-0.916291	0	118	25.9	3.25424	6.72	1.90509	#NULL!	1.33	12.1
0	1	2	8	3.36893	1	1	1	-88	-99	1	6	1	620	60095.5	20	81.25	9.35	-1.65	-1.16	-1.78	0.19	0.173953	0.65	-0.430783	0	112	32.8	3.49043	7.61	2.02946	#NULL!	1.21	12.4
3	1	2	7	-0.739665	1	88	0	-88	-99	1	5	1	620	60095.5	20	84.7	10.2	-1.42	0.05	-1.01	0.28	0.24686	0.6	-0.510826	0	107	8.7	2.16332	12.98	2.56341	4	0.98	11.3
9	1	2	8	8.71723	1	1	1	-88	-99	1	8	2	621	60586.8	20	76.95	9.775	0.3	-2.02	-0.77	0.08	0.076961	0.56	-0.579818	0	112	6.2	1.82455	9.31	2.23109	#NULL!	0.71	13.8
0	2	1	8	1.0271	1	1	1	-88	-99	1	6	1	622	61080.1	20	77.55	9.35	-0.82	-2.49	-1.79	0.3	0.262364	0.6	-0.510826	0	121	16.9	2.82731	9.01	2.19834	#NULL!	1.13	12.7
3	1	2	9	-1.54091	0	0	1	-88	-99	1	8	2	622	61080.1	20	78	8.375	-1.69	-1.69	-2.09	0.88	0.631272	0.53	-0.634878	0	89	5.9	1.77495	17.41	2.85704	4	1.06	11.7
3	2	2	7	-1.1214	1	0	0	-88	-99	1	6	2	624	62072.7	20	78.6	9.35	-0.55	-1.51	-1.15	3.27	1.45161	0.78	-0.248461	0	108	31.2	3.44042	6.09	1.80665	1	1.02	11.3
3	1	2	8	1.96312	0	1	0	-88	-99	1	5	1	625	62572	20	81.1	10.9	0.27	-1.27	-0.44	0.23	0.207014	0.68	-0.385662	0	108	31.1	3.43721	8.96	2.19277	3	1.15	13.2
0	1	1	6	-0.993829	1	0	0	-88	-99	1	5	1	625	62572	20	76.95	8.75	-1.5	-2.72	-2.39	0.22	0.198851	0.64	-0.446287	0	114	7.1	1.96009	13.32	2.58927	#NULL!	1.09	11.5
3	1	2	8	1.18208	1	0	0	-88	-99	1	6	2	626	63073.3	20	78.85	9.5	-0.42	-1.45	-1.03	5.34	1.84688	0.84	-0.174353	1	100.98	4.389	1.4791	18.6945	2.92823	4	0.95	13.5
3	1	2	6	0.211657	1	1	1	-88	-99	1	7	1	629	64589.1	20	79.85	9.25	-1.46	-1.74	-1.92	3.69	1.54543	1.22	0.198851	3	103	22.8	3.12676	6.9696	1.94156	1	0.95	11.5
0	1	2	7	-3.31254	1	0	1	-88	-99	1	4	1	629	64589.1	20	83	10.675	-0.42	-0.64	-0.65	0.02	0.0198026	1.23	0.207014	3	107.12	56.925	4.04173	12.4704	2.52336	3	0.78	11.9
9	1	2	7	-3.13184	1	1	1	-88	-99	1	6	2	631	65609.7	20	75	7.825	-1.8	-2.76	-2.74	0.02	0.0198026	0.46	-0.776529	0	122	63.7	4.15418	5.85	1.76644	#NULL!	1.17	14.8
9	1	1	8	10.9403	1	1	0	-88	-99	1	6	1	633	66638.3	20	76.25	9.2	-0.71	-3.04	-1.99	1	0.693147	0.94	-0.0618754	0	105	49.9	3.91002	6.47	1.86718	1	1.35	14.4
3	1	2	8	-1.5235	1	1	1	-88	-99	1	7	2	633	66638.3	20	77	8.6	-1.15	-2.12	-1.92	0.04	0.0392207	0.61	-0.494296	0	121	11.4	2.43361	12.06	2.48989	#NULL!	1.47	11.6
3	1	1	8	4.25748	1	1	1	-88	-99	1	6	1	633	66638.3	20	80.7	9.8	-0.93	-1.48	-1.43	0.68	0.518794	0.45	-0.798508	0	105	11.1	2.40695	14.05	2.64262	4	0.91	10.5
3	1	2	7	2.04708	1	1	0	-88	-99	1	7	1	633	66638.3	20	80.05	9.85	-0.73	-1.71	-1.38	0.49	0.398776	0.47	-0.755023	0	117	23.3	3.14845	8.16	2.09924	#NULL!	1.25	#NULL!
3	1	2	5	-2.96436	1	1	1	-88	-99	1	6	1	634	67155.6	20	82.9	10.575	-0.51	-0.73	-0.76	0.23	0.207014	0.54	-0.616186	0	106	9	2.19722	11.33	2.42745	4	1.1	12.5
0	1	2	5	-4.66084	0	0	1	-88	-99	1	5	1	634	67155.6	20	83.05	10.25	-0.93	-0.67	-1.03	0.1	0.0953102	0.38	-0.967584	0	95	7.4	2.00148	12.33	2.51204	4	1.28	9.7
3	1	2	8	-2.81774	1	1	0	-88	-99	1	6	2	635	67674.8	20	85.55	11.7	0.33	0.66	0.62	1.42	0.883768	0.88	-0.127833	0	125	46.9	3.84802	7.32	1.99061	#NULL!	0.72	14.3
9	1	1	5	-1.46102	1	0	0	-88	-99	1	4	2	636	68196.1	20	78.8	8.675	-1.46	-1.56	-1.86	2.25	1.17865	1.99	0.688135	3	133.9	144.075	4.97033	9.12	2.21047	#NULL!	1.54	11
3	1	2	5	-0.116382	1	1	0	-88	-99	1	6	1	636	68196.1	20	84.4	10.475	-1.01	-0.22	-0.85	3.7	1.54756	0.78	-0.248461	0	99	8.3	2.11626	14.13	2.6483	4	0.74	11.7
3	1	2	7	-2.67481	1	1	0	-88	-99	1	5	1	638	69244.7	20	81.05	9.5	-1.4	-1.41	-1.73	7.6	2.15176	1.74	0.553885	2	120.96	16.271	2.78938	7.2993	1.98778	#NULL!	0.84	13.5
0	1	2	7	-4.40392	1	0	0	-88	-99	1	6	1	639	69772	20	78.5	9.75	-0.52	-2.31	-1.5	2.61	1.28371	0.69	-0.371064	0	113	21.9	3.08649	6.2	1.82455	#NULL!	1.13	12.4
3	1	2	10	3.23221	0	0	0	-88	-99	1	6	1	639	69772	20	82.5	12.175	1.27	-0.92	0.47	0.45	0.371564	0.65	-0.430783	0	89	5.1	1.62924	14.65	2.68444	4	1.28	11.9
0	1	1	7	-1.59292	1	1	1	-88	-99	1	5	1	640	70301.3	21	79.6	9.4	-1.21	-1.93	-1.83	1.27	0.81978	0.81	-0.210721	0	122	25	3.21888	8.34	2.12106	#NULL!	1.22	15
3	1	2	7	-1.69594	1	1	1	-88	-99	1	7	2	641	70832.6	21	81.65	9.6	-0.95	-0.67	-1.02	0.17	0.157004	0.98	-0.0202027	0	123	17	2.83321	7.98	2.07694	#NULL!	1.44	13.7
0	1	2	6	-1.00287	1	1	1	-88	-99	1	7	1	641	70832.6	21	75.95	8.325	-1.89	-3.21	-2.92	0.06	0.0582689	0.56	-0.579818	0	95	40.6	3.70377	7.55	2.02155	1	1.38	13.3
3	2	2	7	-4.76762	1	1	1	-88	-99	1	7	1	642	71365.9	21	81.3	9.85	-1.01	-1.36	-1.43	0.3	0.262364	0.56	-0.579818	0	109	28.8	3.36038	7.31	1.98924	1	1.13	11.9
9	1	1	7	8.32642	1	1	0	-88	-99	1	6	1	643	71901.1	21	80.35	9.9	-0.73	-1.7	-1.39	0.61	0.476234	0.67	-0.400478	0	117	53.4	3.97781	7.17	1.96991	#NULL!	1.41	13.8
3	2	2	9	-0.200548	1	1	1	-88	-99	1	7	1	644	72438.4	21	85.55	11.575	-0.07	0.09	-0.01	0.13	0.122218	0.62	-0.478036	0	120	24.2	3.18635	8.92	2.1883	#NULL!	1.06	14.6
3	1	1	6	4.68961	88	88	0	-88	-99	1	7	1	644	72438.4	21	81.95	9.625	-1.45	-1.16	-1.65	0.25	0.223144	0.53	-0.634878	0	109	4.9	1.58924	13.47	2.60046	4	1.14	14.4
3	1	2	6	-0.608329	1	1	1	-88	-99	0	2	2	645	72977.7	21	87.45	12.275	0.4	1.17	0.95	0.27	0.239017	1.2	0.182322	3	124.63	102.225	4.62718	8.7168	2.16525	#NULL!	1.63	13
3	1	2	10	-0.0651884	1	1	0	-88	-99	1	5	1	645	72977.7	21	83.55	9.825	-1.59	-0.61	-1.47	2.33	1.20297	0.61	-0.494296	0	103	10.2	2.32239	14.61	2.68171	4	1.1	13.1
0	1	2	7	6.90784	1	1	1	-88	-99	0	4	1	648	74607.6	21	76.1	8.075	-2.32	-3.22	-3.21	0.91	0.647103	0.78	-0.248461	0	63	3.5	1.25276	30	3.4012	4	0.7	14.1
0	1	2	8	2.95873	0	0	0	-88	-99	1	6	1	648	74607.6	21	78.25	8.85	-1.66	-2.47	-2.4	0.06	0.0582689	0.43	-0.84397	0	105	8.6	2.15176	9.05	2.20276	4	1.16	13.6
6	1	2	7	-0.173346	1	1	0	-88	-99	1	5	1	648	74607.6	21	84.5	10.525	-0.97	-0.31	-0.87	0.23	0.207014	0.86	-0.150823	0	107	7.8	2.05412	9.27	2.22678	4	0.9	13.5
6	1	2	6	0.0117134	1	1	0	-88	-99	1	6	2	649	75154.9	21	79.7	10.3	0.3	-1.38	-0.48	0.47	0.385262	0.85	-0.162519	0	120	41.5	3.72569	7.68	2.03862	#NULL!	1.1	10.5
9	1	2	8	4.48721	1	1	1	-88	-99	1	7	2	653	77364	21	77.6	9.15	-0.57	-2.1	-1.49	0.58	0.457425	0.61	-0.494296	0	107	36.1	3.58629	7.49	2.01357	1	1.29	13
3	1	2	4	-1.92426	0	0	1	-88	-99	1	8	1	653	77364	21	80.6	9.575	-1.21	-1.71	-1.74	0.28	0.24686	0.63	-0.462035	0	111	23.5	3.157	14.21	2.65395	#NULL!	1.36	11
0	1	1	8	13.4397	0	1	0	-88	-99	1	8	2	654	77921.3	21	80.45	9.825	-0.41	-1.19	-0.9	0.2	0.182322	0.61	-0.494296	0	111	41.1	3.71601	6.34	1.84688	#NULL!	1.26	#NULL!
3	1	1	8	0.201491	1	0	0	-88	-99	1	5	2	654	77921.3	21	82.25	10.15	-0.46	-0.61	-0.62	0.14	0.131028	0.56	-0.579818	0	119	15.7	2.75366	8.94	2.19054	#NULL!	1.16	13.1
0	2	2	9	1.26211	1	1	0	-88	-99	1	5	2	654	77921.3	21	78.35	8.425	-1.7	-1.87	-2.21	24.52	3.23946	0.89	-0.116534	1	119.79	80.542	4.38878	10.0734	2.3099	#NULL!	0.98	15.3
3	1	2	6	0.865688	0	1	0	-88	-99	1	6	1	654	77921.3	21	82.35	11.825	0.96	-1.11	0.13	0.4	0.336472	0.8	-0.223144	0	118	42.2	3.74242	11.49	2.44148	#NULL!	0.83	14.1
0	1	1	8	3.88048	1	0	0	-88	-99	1	6	1	657	79605.2	21	80.45	9.225	-1.64	-1.79	-2.08	0.48	0.392042	0.77	-0.261365	0	124	33	3.49651	6.78	1.91398	#NULL!	1.12	14.3
1	1	2	7	-2.94338	1	0	1	-88	-99	1	7	2	657	79605.2	21	82.6	9.7	-1.07	-0.52	-1.02	0	0	0.61	-0.494296	0	103	33.5	3.51155	7.05	1.95303	1	1.32	14.1
3	1	2	8	4.98401	1	1	0	-88	-99	1	7	1	658	80170.5	21	85.65	10.35	-1.49	-0.02	-1.07	0.15	0.139762	0.52	-0.653926	0	112	20.3	3.01062	5.19	1.64673	#NULL!	1.22	14
3	1	2	6	7.40485	1	1	0	-88	-99	1	5	2	658	80170.5	21	80.55	9.45	-0.87	-1.19	-1.24	0.24	0.215111	0.52	-0.653926	0	116	12.2	2.50144	6.29	1.83896	#NULL!	1.05	12.5
3	1	2	7	0.647237	1	1	1	-88	-99	1	5	2	658	80170.5	21	78.4	9.325	-0.54	-1.89	-1.36	0.06	0.0582689	0.49	-0.71335	0	116	14.7	2.68785	9.02	2.19944	#NULL!	1.6	11.5
9	1	2	6	7.04539	1	1	0	-88	-99	1	6	1	659	80737.8	21	81.1	10.6	-0.06	-1.59	-0.86	0.96	0.672944	0.81	-0.210721	0	116	45.7	3.8221	7.27	1.98376	#NULL!	1.25	14
3	1	2	5	-0.63002	1	1	1	-88	-99	1	6	1	660	81307	21	83.5	9.85	-1.54	-0.78	-1.51	0.13	0.122218	0.62	-0.478036	0	115	23.9	3.17388	8.34	2.12106	#NULL!	1.27	12.3
3	1	2	7	-0.599983	1	0	0	-88	-99	1	6	1	662	82451.6	21	79.55	10.35	-0.02	-2.15	-1.08	1.49	0.912283	0.99	-0.0100503	0	124	12.7	2.5416	8.26	2.11142	#NULL!	1.36	#NULL!
0	1	2	6	3.90293	1	88	0	-88	-99	1	6	2	662	82451.6	21	80.55	9.575	-0.72	-1.23	-1.16	5.23	1.82938	0.86	-0.150823	1	112.86	11.55	2.44669	14.9865	2.70715	#NULL!	1.12	#NULL!
3	1	1	5	2.08523	1	1	0	-88	-99	1	6	2	663	83026.9	21	80.85	10.125	-0.16	-1.14	-0.7	0.15	0.139762	0.68	-0.385662	0	98	4.4	1.4816	15.85	2.76317	4	1.12	13.6
6	1	2	7	-3.39938	1	1	0	-88	-99	1	6	1	664	83604.2	21	82.05	10.7	-0.16	-1.31	-0.8	12.06	2.56955	1.26	0.231112	2	128.8	20.67	3.02868	7.3863	1.99963	#NULL!	0.93	9.7
0	1	2	5	-3.9075	1	1	1	-88	-99	1	6	2	664	83604.2	21	77.9	8.55	-1.42	-2.1	-2.13	0.22	0.198851	0.44	-0.820981	0	120	8.1	2.09186	8.83	2.17816	#NULL!	2.05	14.6
0	1	2	7	4.82871	1	0	0	-88	-99	1	-99	1	665	84183.5	21	78.7	10.325	0.13	-2.46	-1.13	0.68	0.518794	0.57	-0.562119	0	115	18.9	2.93916	10.93	2.39151	#NULL!	1.07	#NULL!
9	1	2	8	1.67663	0	0	0	-88	-99	1	6	1	665	84183.5	21	81.75	10.575	-0.24	-1.42	-0.91	0.38	0.322083	0.45	-0.798508	0	97	8.1	2.09186	12.23	2.50389	4	0.85	#NULL!
0	1	2	5	-4.54862	0	1	1	-88	-99	0	5	1	666	84764.8	21	83.2	10.325	-0.88	-0.94	-1.13	8.8	2.28238	0.88	-0.127833	1	95.04	13.475	2.60084	10.7841	2.37807	3	0.56	11.6
0	1	2	7	0.382336	1	1	0	-88	-99	1	6	2	666	84764.8	21	78.9	8.975	-1.09	-1.8	-1.73	0.6	0.470004	1.05	0.0487902	3	147.29	17.475	2.86077	5.4336	1.6926	#NULL!	1.4	12.8
3	1	2	5	-3.28212	0	1	0	-88	-99	1	4	1	667	85348.1	21	79.9	10.075	-0.42	-2.07	-1.35	13.44	2.67	2.09	0.737164	2	109.76	73.723	4.30031	6.2727	1.83621	1	1.04	11.7
0	1	2	6	0.287313	0	0	1	-88	-99	1	7	2	667	85348.1	21	80	8.325	-2.24	-1.45	-2.39	0.35	0.300105	0.46	-0.776529	0	125	16.8	2.82138	7.12	1.96291	#NULL!	0.9	15.3
3	1	1	6	9.46357	1	1	1	-88	-99	1	6	1	667	85348.1	21	77.9	9.325	-0.94	-2.76	-2.04	10.08	2.40514	0.89	-0.116534	1	116.82	40.81	3.70893	7.6529	2.03508	#NULL!	1.15	13.1
0	1	2	8	1.37817	1	88	0	-88	-99	1	7	2	669	86520.6	21	74.6	7.85	-1.65	-3.2	-2.91	0.72	0.542324	0.65	-0.430783	0	116	42.9	3.75887	5.15	1.639	#NULL!	0.95	12.3
0	2	1	9	3.1575	1	88	0	-88	-99	1	6	2	669	86520.6	21	82.45	10.225	-0.43	-0.68	-0.64	5.72	1.90509	1.32	0.277632	2	107.52	16.642	2.81193	5.8029	1.75836	1	0.51	#NULL!
3	1	2	6	-2.3785	1	1	0	-88	-99	1	5	2	669	86520.6	21	76.4	8.45	-1.22	-2.62	-2.26	0.4	0.336472	0.65	-0.430783	0	110	9.9	2.29253	6.25	1.83258	#NULL!	0.79	12.3
3	1	2	5	1.17573	1	0	1	-88	-99	1	7	2	669	86520.6	21	80.6	10.45	0.26	-1.28	-0.46	6.79	2.05284	0.83	-0.18633	1	102.96	58.597	4.07068	6.6435	1.89364	1	1.12	11.9
9	1	2	5	0.876402	1	0	1	-88	-99	1	7	1	670	87109.9	22	79.25	9.8	-0.62	-2.32	-1.61	3.79	1.56653	0.75	-0.287682	0	104	16	2.77259	10.4	2.34181	3	1.26	11.4
3	1	2	7	-2.76828	1	0	1	-88	-99	1	6	2	670	87109.9	22	82.4	9.9	-0.78	-0.71	-0.91	0.49	0.398776	0.53	-0.634878	0	108	8.4	2.12823	14.29	2.65956	4	1.33	11.3
9	1	2	7	-0.708086	1	1	1	-88	-99	1	6	1	671	87701.2	22	80.9	9.2	-1.77	-1.77	-2.17	0.14	0.131028	0.65	-0.430783	0	118	14	2.63906	7.08	1.95727	#NULL!	1.31	13.7
3	1	1	6	6.46301	1	0	0	-88	-99	1	5	2	671	87701.2	22	79.95	9.975	-0.12	-1.5	-0.86	0.45	0.371564	1.22	0.198851	3	126.69	6.975	1.94233	15.0048	2.70837	#NULL!	0.96	12.9
6	1	2	5	-4.14699	0	0	0	-88	-99	1	5	2	672	88294.5	22	78.4	8.3	-1.89	-2.01	-2.44	0	0	0.68	-0.385662	0	113	11.2	2.41591	9.38	2.23858	#NULL!	1.37	14.2
3	1	1	5	0.130507	1	0	1	-88	-99	1	7	2	673	88889.8	22	79.1	9.475	-0.51	-1.79	-1.3	1.37	0.86289	0.91	-0.0943107	0	133	17	2.83321	5.78	1.7544	#NULL!	0.91	13.7
6	1	1	9	5.2544	1	1	0	-88	-99	1	7	2	674	89487.1	22	80	9.375	-0.84	-1.51	-1.4	0.57	0.451076	0.57	-0.562119	0	103	21.7	3.07731	8.37	2.12465	3	1.09	12.2
9	1	2	7	1.68469	1	1	0	-88	-99	1	5	2	676	90687.6	22	74.4	8.175	-1.14	-3.32	-2.6	0.03	0.0295588	0.59	-0.527633	0	116	21.1	3.04927	6.57	1.88251	#NULL!	1.49	12.9
3	1	2	6	7.00794	1	1	1	-88	-99	1	6	1	676	90687.6	22	81.15	10.2	-0.54	-1.73	-1.28	26.65	3.31963	1.52	0.41871	2	137.76	29.839	3.39582	6.9165	1.93391	#NULL!	0.83	13.7
3	1	2	6	0.0171442	1	0	0	-88	-99	1	6	1	676	90687.6	22	78.2	9.35	-0.96	-2.73	-2.05	9.89	2.38784	1.23	0.207014	2	132.16	7.208	1.97519	8.6043	2.15226	#NULL!	0.69	12.9
0	2	2	4	-1.02667	1	1	1	-88	-99	1	5	2	677	91290.9	22	69.15	7.15	-1.25	-5	-3.71	0.12	0.113329	0.76	-0.274437	0	106	23.9	3.17388	8.78	2.17248	3	1.38	11.7
3	1	2	6	-3.64935	1	0	0	-88	-99	1	5	1	677	91290.9	22	82.9	10.15	-1.01	-1.14	-1.33	0.59	0.463734	0.6	-0.510826	0	118	12.3	2.5096	9.08	2.20607	#NULL!	1.97	15.7
3	1	1	7	-1.56173	1	0	1	-88	-99	1	7	2	678	91896.2	22	79.65	9.525	-0.58	-1.66	-1.28	0.69	0.524729	0.81	-0.210721	0	113	11.5	2.44235	12.89	2.55645	#NULL!	0.93	11.4
9	1	2	6	-2.41284	1	1	0	-88	-99	1	5	1	678	91896.2	22	79.95	9.75	-0.83	-2.15	-1.69	1.72	1.00063	0.69	-0.371064	0	112	9.7	2.27213	13.77	2.62249	#NULL!	1.42	14.7
9	1	1	7	1.25839	1	1	1	-88	-99	1	7	2	680	93112.8	22	76.55	8.575	-1.09	-2.67	-2.2	0.39	0.329304	0.61	-0.494296	0	119	97	4.57471	7.69	2.03992	#NULL!	1.07	9
3	1	1	9	1.29337	0	0	0	-88	-99	1	5	1	680	93112.8	22	83.6	10.725	-0.51	-0.93	-0.86	0.5	0.405465	0.54	-0.616186	0	125	12.8	2.54945	8.09	2.09063	#NULL!	1.44	#NULL!
0	1	2	5	-3.07466	1	0	1	-88	-99	0	6	2	681	93724.1	22	78.15	8.05	-2.19	-2.16	-2.75	0.98	0.683097	0.66	-0.415515	0	112	8	2.07944	15.32	2.72916	#NULL!	1.07	13.1
9	2	2	6	-1.69848	1	1	0	-88	-99	1	7	2	681	93724.1	22	84.6	11.6	0.47	-0.11	0.33	0.15	0.139762	0.54	-0.616186	0	116	5.5	1.70475	13.15	2.57642	#NULL!	0.79	12.2
3	1	2	7	0.776777	1	0	0	-88	-99	1	6	1	681	93724.1	22	83.7	12.05	0.88	-0.91	0.17	0.45	0.371564	0.51	-0.673345	0	87	10.9	2.38876	16.84	2.82376	4	1.23	13
3	1	2	8	-0.925171	1	0	0	-88	-99	1	4	1	682	94337.4	22	82.45	10.375	-0.64	-1.34	-1.16	2.07	1.12168	1.06	0.0582689	3	104.03	14.925	2.70304	13.7088	2.61804	3	1.27	12.6
6	1	2	8	0.975176	1	1	1	-88	-99	1	5	1	684	95569.9	22	78.2	8.725	-1.84	-2.79	-2.7	0.31	0.270027	0.47	-0.755023	0	117	31	3.43399	5.95	1.78339	#NULL!	1.15	13.8
6	1	2	7	-1.1282	1	1	0	-88	-99	1	6	2	684	95569.9	22	76.05	8.1	-1.63	-2.86	-2.72	3.85	1.57898	1.32	0.277632	3	118.45	11.025	2.40017	10.2432	2.32661	#NULL!	1.65	12.4
3	1	1	6	3.95489	1	1	0	-88	-99	1	6	1	685	96189.2	22	82.6	9.675	-1.55	-1.32	-1.79	0.19	0.173953	0.51	-0.673345	0	107	35.9	3.58074	6.88	1.92862	1	1.11	11.5
0	1	2	5	-1.00657	1	1	1	-88	-99	1	4	1	685	96189.2	22	80.15	9.275	-1.5	-2.14	-2.17	2.8	1.335	1.66	0.506818	3	122.57	35.925	3.58143	12.4416	2.52105	#NULL!	1.24	13.1
6	1	1	4	7.6263	1	0	1	-88	-99	0	6	1	687	97433.8	22	77.2	7.575	-3.4	-3.15	-3.86	16.94	2.88703	0.89	-0.116534	1	121.77	20.713	3.03076	9.0125	2.19861	#NULL!	0.96	13.6
3	1	2	8	-1.69594	1	1	0	-88	-99	1	6	2	687	97433.8	22	84.45	10.7	-0.4	-0.22	-0.36	0.5	0.405465	0.94	-0.0618754	0	115	13.5	2.60269	14.36	2.66445	#NULL!	1.36	11.9
3	1	2	6	-4.46476	1	0	1	-88	-99	1	7	1	688	98059.1	22	83.55	10.25	-1.05	-1.02	-1.3	0.03	0.0295588	0.72	-0.328504	0	103	29	3.3673	13.9	2.63189	3	1.61	12.6
0	1	2	5	-3.34975	1	1	0	-88	-99	1	5	1	689	98686.4	22	80.15	9.175	-1.64	-2.18	-2.28	0.08	0.076961	0.77	-0.261365	0	121	32	3.46574	12.24	2.50471	#NULL!	1.8	#NULL!
0	1	2	7	1.15108	1	1	0	-88	-99	1	7	1	690	99315.7	22	82.05	11.15	0.34	-1.55	-0.56	0.22	0.198851	0.54	-0.616186	0	101	10.3	2.33214	8.75	2.16905	4	1.13	11.4
0	2	2	8	-4.05248	0	0	0	-88	-99	1	6	1	690	99315.7	22	85.5	11.15	-0.51	-0.39	-0.56	0.25	0.223144	1.3	0.262364	3	118.45	13.05	2.56879	12.5856	2.53255	#NULL!	2.11	14.2
0	1	2	8	-4.40392	1	0	1	-88	-99	1	7	2	691	99947	22	74.85	7.825	-1.76	-3.29	-3.06	0.17	0.157004	0.44	-0.820981	0	106	7.9	2.06686	8.47	2.13653	4	0.85	11.9
3	1	2	6	-1.78042	1	1	0	-88	-99	1	7	2	692	100580	22	74.7	8.225	-1.14	-3.35	-2.63	0.29	0.254642	0.94	-0.0618754	0	108	40.9	3.71113	8.56	2.1471	3	1.39	10.8
3	2	2	7	0.7004	1	1	0	-88	-99	1	4	1	692	100580	22	81.55	10.3	-0.51	-1.73	-1.27	1.11	0.746688	0.72	-0.328504	0	108	7.3	1.98787	10.82	2.3814	4	1.13	11.9
3	1	2	8	3.35965	1	0	0	-88	-99	1	6	1	692	100580	22	77.25	9.325	-0.79	-3.17	-2.15	1.53	0.928219	0.98	-0.0202027	0	85	3.5	1.25276	28.96	3.36592	4	1.42	13.9
3	1	2	8	0.454005	1	1	0	-88	-99	1	5	1	696	103133	22	81.4	9.575	-1.39	-1.82	-1.94	0.01	0.00995033	0.42	-0.867501	0	128	45.8	3.82428	5.51	1.70656	#NULL!	1.13	14.2
9	1	2	7	-1.78393	1	0	0	-88	-99	1	5	1	696	103133	22	84.05	10.5	-0.88	-0.93	-1.12	0.46	0.378436	1.03	0.0295588	3	109.18	21	3.04452	6.2016	1.82481	1	1.26	11.9
3	1	2	9	0.74567	0	0	0	-88	-99	1	7	1	696	103133	22	79.55	8.725	-2.14	-2.44	-2.76	22.14	3.14156	1.64	0.494696	2	123.2	29.309	3.37789	13.4589	2.59964	#NULL!	0.86	#NULL!
0	1	2	4	-3.41059	0	0	1	-88	-99	1	5	1	698	104422	22	82.55	9.425	-1.87	-1.45	-2.09	0.84	0.609766	0.67	-0.400478	0	110	11.1	2.40695	9.1	2.20827	#NULL!	1	11.5
6	1	2	7	-0.246385	0	1	0	-88	-99	0	4	1	699	105069	22	82.25	10.45	-0.49	-1.56	-1.18	1.4	0.875469	1.15	0.139762	3	118.45	15.45	2.73761	6.8064	1.91786	#NULL!	1.24	12.4
3	1	2	6	4.4359	1	1	0	-88	-99	1	6	1	699	105069	22	78.05	9.65	-0.54	-2.96	-1.88	3.88	1.58515	1.03	0.0295588	3	101.97	16.575	2.8079	12.3456	2.5133	3	0.79	13
9	1	2	7	-3.38918	0	0	1	-88	-99	0	4	1	700	105719	23	80.9	9.9	-0.85	-2.02	-1.66	0.27	0.239017	0.61	-0.494296	0	109	20.3	3.01062	7.12	1.96291	1	1.21	13.3
3	2	2	5	-3.94177	0	0	0	-88	-99	1	6	1	700	105719	23	78.55	9.1	-1.38	-2.8	-2.4	0.01	0.00995033	0.47	-0.755023	0	111	16.7	2.81541	8.6	2.15176	#NULL!	0.56	16
9	1	2	8	4.82801	1	0	1	-88	-99	1	8	2	702	107023	23	83.3	9.575	-1.4	-0.72	-1.36	0.27	0.239017	0.69	-0.371064	0	116	46.4	3.8373	5.3	1.66771	#NULL!	1.85	12.1
9	1	2	7	0.656222	1	1	1	-88	-99	1	7	1	702	107023	23	83.45	10.425	-0.82	-1.18	-1.22	0.17	0.157004	0.55	-0.597837	0	116	11.8	2.4681	8.26	2.11142	#NULL!	1.3	12.4
0	1	2	4	2.2941	1	1	0	-88	-99	1	7	1	703	107678	23	83.2	10.825	-0.29	-1.28	-0.89	0.29	0.254642	0.68	-0.385662	0	105	6.8	1.91692	9.66	2.26799	4	1.45	12.4
3	1	2	8	-3.13184	1	1	1	-88	-99	1	7	2	704	108336	23	75.9	8.125	-1.57	-3.06	-2.8	0.48	0.392042	0.63	-0.462035	0	97	44.4	3.79324	6.95	1.93874	1	1.15	13
9	1	2	4	0.698915	1	1	0	-88	-99	1	5	1	705	108995	23	78.4	9.025	-1.46	-2.89	-2.5	1.38	0.8671	0.77	-0.261365	0	107	32.6	3.48431	8.99	2.19611	3	1.3	13.3
3	1	2	6	-4.66002	1	1	1	-88	-99	1	5	2	705	108995	23	80.35	9.325	-0.98	-1.67	-1.6	0.15	0.139762	0.71	-0.34249	0	93	10.4	2.34181	15.03	2.71005	4	1.07	11.6
3	2	2	7	4.31927	1	0	1	-88	-99	1	6	1	706	109656	23	79.25	9.1	-1.54	-2.62	-2.43	12.99	2.63834	1.1	0.0953102	2	122.08	14.999	2.70798	6.6903	1.90066	#NULL!	0.89	10.7
0	1	2	8	4.37245	0	0	0	-88	-99	1	8	1	706	109656	23	83.25	11.225	0.13	-1.29	-0.58	0.45	0.371564	0.52	-0.653926	0	117	91.2	4.51305	7.23	1.97824	#NULL!	1.58	13.2
3	1	2	5	-1.2013	1	0	1	-88	-99	1	5	1	707	110320	23	79.35	9.425	-1.13	-2.59	-2.13	0.25	0.223144	0.63	-0.462035	0	96	37.9	3.63495	6.8	1.91692	1	0.99	10.2
3	2	2	4	-4.89608	1	1	1	-88	-99	1	5	1	708	110985	23	81.5	8.975	-2.24	-1.88	-2.56	0.39	0.329304	0.53	-0.634878	0	119	9.3	2.23001	7.05	1.95303	#NULL!	1.44	12.5
3	1	2	7	3.56062	1	1	1	-88	-99	1	6	1	708	110985	23	80.95	9.85	-0.93	-2.07	-1.74	0.19	0.173953	0.6	-0.510826	0	107	17.5	2.8622	12.32	2.51122	3	0.9	7.5
9	1	2	6	-2.0663	1	0	0	-88	-99	1	4	1	710	112321	23	87.1	12.85	0.82	-0.04	0.59	0.11	0.10436	0.68	-0.385662	0	123	14.8	2.69463	6.87	1.92716	#NULL!	1.1	14
3	1	2	9	0.726006	1	1	0	-88	-99	1	5	1	710	112321	23	84.3	10.025	-1.54	-0.97	-1.6	0.56	0.444686	0.39	-0.941609	0	131	11.6	2.45101	7.82	2.05668	#NULL!	1.26	12.7
3	1	2	6	#NULL!	1	1	1	-88	-99	1	6	2	711	112993	23	85.6	10.95	-0.42	-0.08	-0.29	0.57	0.451076	0.49	-0.71335	0	117	6.7	1.90211	9.44	2.24496	#NULL!	1.14	11.6
3	1	2	7	-4.33629	1	0	0	-88	-99	1	5	1	711	112993	23	82.55	11.475	0.56	-1.56	-0.41	0.31	0.270027	0.59	-0.527633	0	94	3.3	1.19392	18.09	2.89536	4	0.88	14.8
9	1	1	8	2.70563	1	1	1	-88	-99	1	9	2	713	114341	23	80.45	9.875	-0.35	-1.71	-1.16	0	0	0.37	-0.994252	0	112	44.7	3.79997	5.35	1.6771	#NULL!	1.29	11.9
3	1	1	6	1.46216	1	1	0	-88	-99	1	5	1	713	114341	23	87	11.075	-1	-0.1	-0.74	0.19	0.173953	0.47	-0.755023	0	133	54.7	4.00186	6.25	1.83258	#NULL!	1.2	#NULL!
0	1	2	5	2.69967	1	1	1	-88	-99	1	7	1	713	114341	23	87.1	11.425	-0.63	-0.07	-0.46	2.9	1.36098	0.89	-0.116534	0	116	45.9	3.82647	8.77	2.17134	#NULL!	0.91	12.4
0	1	2	7	1.80198	1	1	0	-88	-99	1	6	1	714	115019	23	80	8.225	-3.01	-2.43	-3.33	0.16	0.14842	0.56	-0.579818	0	118	32.1	3.46886	7.84	2.05924	#NULL!	0.9	12.9
3	1	2	9	2.3409	1	1	0	-88	-99	1	6	2	715	115698	23	79.95	9.525	-0.65	-1.88	-1.47	0.08	0.076961	0.61	-0.494296	0	111	35.7	3.57515	7.96	2.07443	#NULL!	1.09	14.4
0	1	2	8	-3.78583	1	0	1	-88	-99	1	6	2	716	116379	23	79.4	8.325	-2.09	-2.06	-2.65	1.53	0.928219	0.63	-0.462035	0	114	35.1	3.5582	6.36	1.85003	#NULL!	1.28	11.8
3	1	1	8	4.48293	1	1	0	-88	-99	1	5	2	718	117748	23	82.55	9.85	-0.88	-1.09	-1.2	0.07	0.0676586	0.4	-0.916291	0	124	13.6	2.61007	7.32	1.99061	#NULL!	1.4	12.3
3	1	2	6	-1.22536	1	1	0	-88	-99	1	6	1	719	118435	23	80.4	10.175	-0.41	-2.34	-1.51	0	0	0.42	-0.867501	0	114	44.4	3.79324	4.81	1.5707	#NULL!	0.91	12.4
3	1	2	6	-4.14699	1	1	0	-88	-99	1	5	1	719	118435	23	90.05	12.55	-0.18	0.85	0.34	0.35	0.300105	0.72	-0.328504	0	123	30	3.4012	7.86	2.06179	#NULL!	1.46	12.3
3	2	2	9	2.29453	0	1	1	-88	-99	1	7	1	720	119124	23	83.55	11.225	0.06	-1.31	-0.65	1.4	0.875469	0.88	-0.127833	0	90	4	1.38629	15.81	2.76064	4	0.77	13.8
3	1	1	8	-0.661264	1	0	0	-88	-99	1	5	2	720	119124	23	82.65	9.45	-1.38	-1.08	-1.56	0.36	0.307485	0.48	-0.733969	0	96	4.7	1.54756	16.14	2.7813	4	1.08	14.1
3	1	2	8	2.54432	1	0	0	-88	-99	1	6	1	722	120509	23	83.35	10.825	-0.33	-1.39	-0.98	0.17	0.157004	0.54	-0.616186	0	101	15.9	2.76632	12.22	2.50307	3	1.41	12.6
3	1	2	4	-3.22676	1	1	0	-88	-99	1	6	2	723	121204	23	83.45	9.925	-1.02	-0.85	-1.17	0.44	0.364643	0.7	-0.356675	0	98	86	4.45435	8.53	2.14359	3	1.37	11.7
0	2	2	9	-0.289948	1	1	0	-88	-99	1	7	2	726	123302	23	67.55	9.7	2.5	-5.82	-1.37	0.36	0.307485	0.56	-0.579818	0	109	73.3	4.29456	5.04	1.61741	1	1.03	#NULL!
1	1	1	8	2.68779	1	1	0	-88	-99	1	5	1	727	124005	23	84.8	10.8	-0.72	-0.96	-1.02	0.85	0.615186	0.87	-0.139262	0	112	48.4	3.8795	5.27	1.66203	#NULL!	1.43	16.2
3	1	2	9	2.74826	1	1	0	-88	-99	1	7	1	730	126127	23	81.1	10.5	-0.18	-2.19	-1.28	1.41	0.879627	0.52	-0.653926	0	102	19.3	2.96011	6.05	1.80006	1	1.03	11.3
3	1	2	7	0.192447	0	1	1	-88	-99	1	6	2	731	126838	23	80.45	9.375	-1.11	-1.64	-1.69	1.73	1.0043	0.71	-0.34249	0	90	3.4	1.22378	23.61	3.16167	4	1.32	11
